# Supplementary material for: Predictors of hospitalisations for heart failure and mortality in patients with pulmonary hypertension associated with left heart disease: a systematic review
Source: PubMed Central journal article supplement — BMJ Open. 2014 Jul 10;4(7):e004843. doi: 10.1136/bmjopen-2014-004843 (PMC4120416; doi:10.1136/bmjopen-2014-004843), 2014-07-10
Supplement: bmjopen-2014-004843.draft_revisions.pdf [file bmjopen-2014-004843.draft_revisions.pdf]

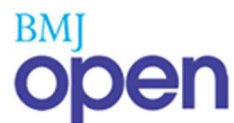

**Predictors of hospitalizations for heart failure and mortality  
in patients with pulmonary hypertension associated with  
left heart disease: A systematic review**

|                                    |                                                                                                                     |
|------------------------------------|---------------------------------------------------------------------------------------------------------------------|
| Journal:                           | <i>BMJ Open</i>                                                                                                     |
| Manuscript ID:                     | bmjopen-2014-004843                                                                                                 |
| Article Type:                      | Research                                                                                                            |
| Date Submitted by the Author:      | 12-Jan-2014                                                                                                         |
| Complete List of Authors:          | Dzudie, Anastase<br>Kengne, Andre; South African Medical Research Council,<br>Thienemann, Friedrich<br>Sliwa, Karen |
| <b>Primary Subject<br>Heading</b>: | Cardiovascular medicine                                                                                             |
| Secondary Subject Heading:         | Cardiovascular medicine                                                                                             |
| Keywords:                          | Pulmonary hypertension, left heart disease, outcome, mortality, predictors,<br>hospitalization                      |
|                                    |                                                                                                                     |

SCHOLARONE™  
Manuscripts

1  
2  
3 **Predictors of hospitalizations for heart failure and mortality in patients with pulmonary**  
4 **hypertension associated with left heart disease: A systematic review**  
5  
6  
7

8 **Authors:**

9  
10 Anastase DZUDIE, MD, FESC (1,2), Andre Pascal Kengne, MD, PhD (2,3), Friedrich  
11 Thienemann, MD, PhD (2,4,5) and Karen Sliwa, MD, PhD, FESC, FACC (2,3,6)  
12  
13

14  
15  
16 **Affiliations:**

- 17  
18  
19 (1) Douala General Hospital and Buea Faculty of Health Sciences, Cameroon  
20  
21 (2) Department of Medicine, Faculty of Health Sciences, University of Cape Town, South  
22 Africa  
23  
24 (3) Non-Communicable Diseases Research Unit, South African Medical Research Council,  
25 Cape Town, South Africa  
26  
27 (4) Clinical Infectious Diseases Research Initiative, Institute of Infectious Diseases and  
28 Molecular Medicine, Faculty of Health Sciences, University of Cape Town, Cape Town,  
29 South Africa  
30  
31 (5) Division of Infectious Diseases and HIV Medicine, Department of Medicine, University  
32 of Cape Town, Cape Town, South Africa  
33  
34 (6) Hatter Institute for Cardiovascular Research in Africa, Cape Heart Group, University of  
35 Cape Town, Cape Town, South Africa  
36  
37  
38  
39  
40  
41  
42

43 **Address for Correspondence:**

44  
45 Dr Anastase DZUDIE, MD; FESC. Douala General Hospital; P.O Box 4856, Douala; Cameroon;  
46  
47 Tel: + (237)79617981; Fax: + (237)33370146; E-mail: aitzudie@yahoo.com  
48  
49  
50  
51  
52  
53  
54  
55  
56  
57  
58  
59  
60

**ABSTRACT**

Objectives: Left heart disease (LHD) is the main cause of pulmonary hypertension (PH), but little is known regarding the predictors of adverse outcome of PH associated with LHD (PH-LHD).

We conducted a systematic review to investigate the predictors of hospitalizations for heart failure and mortality in patients with PH-LHD.

Design: Systematic review

Data sources: PubMed MEDLINE and SCOPUS from inception to August 2013 were searched, and citations identified via the ISI Web of science.

Study selection: Studies that reported on hospitalization and/or mortality in patients with PH-LHD were included if the age of participants was greater than 18 years and PH was diagnosed using Doppler echocardiography and/or right heart catheterization. Two reviewers independently selected studies, assessed their quality and extracted relevant data.

Results: In all 45 studies (38 from Europe and USA) were included among which 71.1% were of high quality. Thirty-nine studies were published between 2003 and 2013. The number of participants across studies ranged from 46 to 2385; the proportion of men from 21% to 91%; mean/median age from 63 to 82 years; and prevalence of PH from 7 to 83.3%. PH was consistently associated with increased mortality risk in all forms of LHD, except for aortic valve disease where findings were inconsistent. Six of the nine studies with data available on hospitalizations reported a significant adverse effect of PH on hospitalization risk. Other predictors of adverse outcome were very broad and heterogeneous including right ventricular dysfunction, functional class, left ventricular function and presence of kidney disease.

1  
2  
3 Conclusions: PH is almost invariably associated with increased mortality risk in patients with  
4  
5 LHD. However, effects on hospitalization risk are yet to be fully characterized; while available  
6  
7 evidence on the adverse effects of PH have been derived essentially from Caucasians.  
8  
9

10 Word count - 289  
11

12 **Key words:**  
13

14 Pulmonary hypertension, left heart disease, outcome, mortality, predictors, hospitalization  
15  
16  
17  
18  
19  
20  
21  
22  
23  
24  
25  
26  
27  
28  
29  
30  
31  
32  
33  
34  
35  
36  
37  
38  
39  
40  
41  
42  
43  
44  
45  
46  
47  
48  
49  
50  
51  
52  
53  
54  
55  
56  
57  
58  
59  
60

For peer review only

## ARTICLE SUMMARY

### Article focus

A systematic review to identify and synthesize the evidence on predictors of hospitalizations for heart failure (HF) and mortality in patients with pulmonary hypertension due to left heart disease (PH-LHD)

### Key messages

- PH is an independent predictor of mortality in patients with LHD, but the evidence is more consistent in patients with HF and mitral regurgitation.
- Existing evidence on the outcomes of patients with LHD-PH have been derived essentially from studies in Western and developed countries, and may not apply to populations in other settings
- The hypothesis of targeting PH to improve the outcomes of patients with left heart diseases should be actively investigated.

### Strengths and limitations

- Our search strategy was likely limited by its focus on full report published in English and French, and traceable via PubMed MEDLINE and/or SCOPUS

- Important heterogeneity in the included studies precluded the pooling of data to perform a metaanalysis.
- This is the first systematic review on determinants of hospitalizations and mortality in patients with PH-LHD, which presents the available up-to-date and high quality evidence on the subject matter.

For peer review only

## INTRODUCTION

Pulmonary hypertension (PH) describes a group of disorders resulting from an increase in pulmonary vascular resistance, pulmonary blood flow, pulmonary venous pressure, or a combination of these features (1). Based on shared pathological, hemodynamic characteristics and therapeutic approaches, five clinical groups of PH have been distinguished (2), with PH associated with left heart disease (PH-LHD) or PH group 2 credited to be the most frequent form of PH in contemporary clinical settings (3). Indeed, pulmonary hypertension is common in patients with left heart disease (LHD), where it often reflects the background LHD, but has also been reported to be a marker of disease severity and unfavorable prognosis. Patients with PH-LHD have more severe symptoms, worse tolerance to effort, experience higher hospitalization rates, and are more likely to receive an indication of the need for cardiac transplant (3), with major implications for the quality of life of patients and healthcare costs. Several studies have reported PH-LHD to be associated with increased mortality, both in patients with systolic dysfunction and those with preserved left ventricular ejection fraction (LVEF) (3-6). Furthermore, the presence of preoperative PH has been associated with poor outcomes in patients with valve disease undergoing valve replacement (5, 7). However, there are still several gaps in the existing evidence, including the prevalence of PH-LHD and measurement of the true impact of PH on symptoms and outcome of various left heart diseases. Equally, little is known regarding the effect of the severity of PH on hospitalizations, re-hospitalization and death, and their co-factors in patients with LHD. Considering the number of recent advances in the management of pulmonary hypertension, it is likely that a better understanding of the impact of PH-LHD on major outcomes might assist the clinical management of patients with pulmonary hypertension.

We performed a systematic review of the existing literature to determine the predictors of hospitalization and mortality in patients with pulmonary hypertension secondary to left heart

1  
2  
3 diseases including systolic dysfunction, diastolic dysfunction and/or valve disease. Additionally,  
4  
5 we aimed to assess whether the severity of PH affects the risk of the two outcomes.  
6  
7  
8  
9

## 10 **METHODS**

11  
12 We search MEDLINE via PubMed and SCOPUS from inception to August 2013 for all published  
13  
14 studies on PH-LHD, using a combination of key words described in the Online Box 1. All  
15  
16 searches were restricted to studies in humans published in 'English' or 'French' languages. In  
17  
18 addition, we manually searched the reference lists of eligible studies and relevant reviews, and  
19  
20 traced studies that had cited them through the ISI Web of Science for any relevant published and  
21  
22 unpublished data. Two independent reviewers (AD and APK) performed the study selection, data  
23  
24 extraction and quality assessment; and disagreements were resolved by consensus or consulting a  
25  
26 third reviewer (KS).  
27  
28  
29  
30

31  
32 Studies that reported on hospitalization and/or mortality in patients with PH-LHD were included  
33  
34 if the following criteria were met: 1) age of participants greater than 18 years; 2) RVSP (Right  
35  
36 ventricular systolic pressure) measured by transthoracic Doppler echocardiography and  
37  
38 calculated from the maximum tricuspid regurgitation jet velocity using the modified Bernoulli  
39  
40 equation ( $4v^2$ ) and adding right atrial pressure (RAP). RAP could be a fixed value from 5 mmHg  
41  
42 to 10 mmHg, could have been estimated clinically using the jugular venous pressure (JVP), or  
43  
44 estimated by measuring the inferior vena cava size and change with spontaneous respiration  
45  
46 using echocardiography; and/or 3) mean pulmonary artery pressure (mPAP) measured by right  
47  
48 heart catheterization or by Doppler echocardiography. We excluded narrative reviews and case  
49  
50 series.  
51  
52  
53

54  
55 The following variables were extracted from each study: publication year; country of origin of  
56  
57 the study, study design, study population's demographics, the mean/median follow-up duration,  
58  
59  
60



1  
2  
3 the outcome predicted, the proportion of measurable RVSP, the mean/median baseline RVSP or  
4 mPAP, the prevalence of PH, the readmission rate, the mortality rate with odds ratio (OR) or  
5 hazards ratio (HR) for PH where reported, and the predictors of outcome including the tricuspid  
6 annular plan systolic excursion (TAPSE). One study (8) reported the effect of PH in relation with  
7 survival. Effects on mortality were obtained by taking the inverse of the HR for survival.  
8  
9

### 10 11 12 13 14 15 **Quality assessment**

16  
17 The methodological quality of the selected studies was assessed using the Quality In Prognosis  
18 Studies (QUIPS) tool, designed for systematic reviews of prognostic studies through an  
19 international expert consensus (Table 1) (9). The QUIPS contains six domains assessing the  
20 following: (1) bias due to patient selection, (2) attrition, (3) measurement of prognostic factors,  
21 (4) outcome measurement, (5) confounding on statistical analysis and reporting results (6)  
22 confounding on presentation. In prognosis studies designed to predict a specific outcome based  
23 on a combination of several possible prognostic factors, confounding is not an issue. Therefore  
24 the items on confounding were considered irrelevant for our quality assessment. The remaining  
25 17 items of the five categories each were scored to assess the quality of the included studies. For  
26 each study, the five domains were scored separately as high (+), moderate (+/-) or low (-) quality  
27 (i.e. presenting a low, moderate, or high risk of bias, respectively). To strengthen the  
28 discriminative capacity of the QUIPS, we used the scoring algorithm developed by de Jonge et al  
29 (10), as explained described in details in the Online Table1.  
30  
31  
32  
33  
34  
35  
36  
37  
38  
39  
40  
41  
42  
43  
44  
45  
46  
47

### 48 49 **Data synthesis**

50 Hospitalizations or re-hospitalizations for heart failure and mortality identified by multivariable  
51 analysis in individual studies are presented, including their estimated effect size (e.g. odds or  
52 hazard ratio) and 95% confidence interval (CI). Quantitative analysis of results was not done due  
53 to important heterogeneity in study design, study population, PH definition and measurement,  
54  
55  
56  
57  
58  
59  
60

1  
2  
3 outcome definitions in the studies, and confounding or other type of prognostic factors. We have  
4  
5 therefore presented a narrative summary of the available evidence.  
6  
7  
8  
9

## 10 **RESULTS**

### 11 **Studies selection**

12  
13 Figure 1 presents a flow diagram for the study selection process. Of the 7550 citations identified  
14  
15 through searches, 6255 titles were examined and 6083 were excluded on the basis of the title  
16  
17 scanning. The remaining 172 abstracts were examined and 55 articles were screened by full text  
18  
19 of which 15 were excluded for various reasons (Figure 1). Five studies were identified via  
20  
21 citation search. Therefore, 45 articles were included in the final review among which 86.7% were  
22  
23 published between 2003 and 2013 (Online Figure 2).  
24  
25  
26  
27  
28

### 29 **Study characteristics and methodological quality**

30  
31 The characteristics of the 45 included studies are described in Table 2. The overall quality score  
32  
33 ranged from 29.5 to 72.5 points with a median of 63.5. Based on the cutoffs of  $\geq 60$  and  $\geq 45$   
34  
35 points, respectively, we classified 34 articles as being of high quality, 7 as moderate-to-high  
36  
37 quality and four as low quality studies. Studies of high quality were recent and scored well on  
38  
39 patient selection, outcome measurement, statistical analysis and presentation. Studies classified as  
40  
41 moderate/low quality scored relatively well on patient selection, but poorly on study attrition,  
42  
43 statistical analysis and presentation. Twenty four (53.3%) studies were from USA, twelve  
44  
45 (26.6%) from Europe (four from UK, three from Italy, and one from Spain, Germany, Denmark,  
46  
47 France, Sweden), six (13.3%) from Asia (two from Japan, one from India, China, Korea and  
48  
49 Australia) and one from South Africa. One study was multicentric across Europe and USA (11)  
50  
51 and another one was multicentric across USA and Canada (12). Only three population based  
52  
53 cohorts were reported including two prospective (13, 14) and one retrospective studies (15). For  
54  
55  
56  
57  
58  
59  
60

1  
2  
3 the remaining 42 hospital-based cohort studies, 20 had a retrospective design. The number of  
4 participants ranged from 46 to 2385 in hospital-based and from 244 to 1049 in population-based  
5 studies. The proportion of men ranged from 21% to 91%, and mean/median age from 63 to 82  
6 years. Twenty six studies were in patients with heart failure (HF) and cardiomyopathies (two in  
7 heart failure with preserved ejection fraction [HFpEF]) and nineteen in patients with valve  
8 disease.

9  
10 Thirteen studies defined PH using right heart catheterization (RHC) and 32 studies using Doppler  
11 echocardiography. Studies applied variable definitions of PH using both RHC (based on mPAP  
12 >25 or 30 mm Hg, or on systolic pulmonary artery pressure (sPAP) > 50 mm Hg, or on  
13 pulmonary vascular resistance (PVR) > 2.5 wood units (WU) and Doppler echocardiography  
14 (based on RVSP with cutoffs varying from 35 to 50 mm Hg or based on a mPAP > 25 mm Hg (8),  
15 or on a right ventricular tricuspid gradient (RV TG) > 25 mm Hg (16).  
16  
17  
18  
19  
20  
21  
22  
23  
24  
25  
26  
27  
28  
29  
30  
31  
32  
33

## 34 **Outcome of pulmonary hypertension**

### 35 **Admissions for heart failure**

36  
37 The duration of follow-up ranged from six months up to 15 years, and the incidence of the  
38 outcome of interest when reported ranged from 19.7 to 75% for readmission. Admissions or  
39 readmissions for HF was reported in 9 studies among which 7 reported hazard ratios or odd ratios  
40 for admission/readmission in relation with PH. Effect estimates for 6 out of the 7 studies were  
41 statistically significant.  
42  
43  
44  
45  
46  
47  
48  
49

### 50 **Mortality**

51  
52 Mortality was reported in all studies; however, not all of them provided multivariable adjusted  
53 effect estimates of mortality risk associated with PH. PH was associated with increased all-cause  
54 mortality in 24 out of 26 studies of HF, while two studies failed to report an association between  
55  
56  
57  
58  
59  
60

1  
2  
3 PH and all-cause mortality at 6 months. One of these two studies, which was a multicentric trial  
4  
5 of HF reported an effect estimates for mortality risk from PH [HR 0.89 (95% CI: 0.66-1.20)]  
6  
7 (12), while the other one (17) didn't. As summarized in Table 3, over 35 potential predictors of  
8  
9 mortality were tested across studies with variable and often inconsistent effects on the outcome of  
10  
11 interest. Age was associated with mortality in 14 studies, male gender in 3/11 studies, left  
12  
13 ventricular ejection fraction (LVEF) in 6/10 studies, right ventricular (RV) function in 3/3 studies  
14  
15 and renal disease (rising creatinine, decreasing glomerular filtration rate (GFR) or dialysis) in  
16  
17 6/17 studies, functional class [New York Heart Association (NYHA) or World Heart  
18  
19 Organization (WHO)] in 7/12 studies while the six minutes walking distance was tested in only  
20  
21 one study but was not integrated in the multivariable analysis for outcome risk (17).  
22  
23  
24  
25  
26  
27  
28

## 29 **DISCUSSION**

30  
31 An increasing number of studies have assessed the risk of readmission and mortality in patients  
32  
33 with LHD related PH over the last decade, and mostly in North America and Europe. Available  
34  
35 studies are mostly consistent on the adverse effect of PH on mortality risk in patients with heart  
36  
37 failure as well as those with mitral valve disease, but less unanimous in those with aortic valve  
38  
39 disease. The consistent adverse effect of PH in this population highlights the importance of early  
40  
41 diagnosis of PH to reduce mortality. While available studies have been overall of acceptable  
42  
43 quality, substantial heterogeneity in the study population, PH definition and measurement,  
44  
45 outcome definitions as well as other prognostic factors limits direct comparisons across studies.  
46  
47 Information on readmission for heart failure was limited and the assessment of other prognostic  
48  
49 factors in an integrated multivariable model was very heterogeneous.  
50  
51  
52  
53  
54

### 55 ***Mortality in patients with pulmonary hypertension and heart failure***

1  
2  
3 While PH was an independent prognostic factor for mortality in fatal-outcome studies, the  
4 prevalence of PH and effects on mortality varied according to LVEF. Differences in the  
5 prevalence of PH could be explained at least in part by population heterogeneity (age, level of  
6 HF, HF centers or community study) and differences in the criteria used to define PH across  
7 studies with a variety of cutoff values. Regardless of the prevalence of PH, there seems to be no  
8 significant association between the magnitude of reduction in LVEF, the presence or absence of  
9 PH and the effects of PH on mortality risk. It is possible that the small size of studies and the  
10 short duration of follow-up precluded the accumulation of substantial number of events to allow  
11 the detection of a relationship if any. Furthermore, although the precise hemodynamic threshold  
12 beyond which RVSP is invariably associated with mortality is subject to debate; the risk of death  
13 associated with PH seems to be higher with increase RVSP (9, 14). A possible pathophysiologic  
14 explanation is that early and higher vascular remodeling occurs in patients with HF and severe  
15 PH, causing a reactive or “post capillary PH with a pre-capillary component”, which in turn has a  
16 greater impact on the RV function. This of course is consistent with late diagnosis in heart valve  
17 disease, especially rheumatic heart disease (RHD) presenting with HF. Equally, RV systolic  
18 function has been shown to be highly influenced by pressure overload and by vascular resistance  
19 in the pulmonary region (52); and RV function assessed using right heart catheterization or  
20 echocardiography has been shown to be associated with mortality (20, 32, 33). It is however  
21 remarkable that one study (32) reported no interaction between PH and RV function, with both  
22 variables being independently associated with mortality. This highlights the fact that RV function  
23 in HF does not only depend on pulmonary pressure but may also reflect intrinsic myocardial  
24 disease. As suggested by Vachieri et al (6), there might be a spectrum of clinical phenotypes of  
25 RV failing in PH-LHD that might evolve from one to the other, from isolated post-capillary PH  
26  
27  
28  
29  
30  
31  
32  
33  
34  
35  
36  
37  
38  
39  
40  
41  
42  
43  
44  
45  
46  
47  
48  
49  
50  
51  
52  
53  
54  
55  
56  
57  
58  
59  
60

1  
2  
3 with little effect on the RV to more advanced disease where the failing RV is the key determinant  
4  
5 of outcome.  
6

7  
8 Over the last decades, the increasing prevalence of HFpEF (53) has been paralleled by an  
9  
10 increasing presence of PH in patients with HFpEF (10). When compare to heart failure with  
11  
12 reduced ejection fraction (HFrEF), patients with HFpEF have their subset of risks factors but  
13  
14 finally, PH convey similar morbidity and mortality risk in the two subgroups of patients (10, 15,  
15  
16 19). The current incomplete understanding of HFpEF limits our ability to explain why these  
17  
18 patients develop PH. However, it is estimated that over time left atrium and ventricular filling  
19  
20 pressure from compromised left ventricle and in some, left atrium relaxation and distensibility  
21  
22 can lead to elevated pulmonary venous pressure, triggering vasoconstriction and arterial  
23  
24 remodeling (2). In total, the finding of PH as an independent prognostic factor for mortality in  
25  
26 patients with HF tends to support the suggestion that PH should be considered as a potential  
27  
28 therapeutic target at least in the group patients with HF who exhibit persisting PH after  
29  
30 optimization of HF therapy. In this line, targeting both pulmonary vasculature and the heart  
31  
32 would probably be more beneficial.  
33  
34  
35  
36  
37

### 38 ***Mortality in patients with PH related to valvular heart disease***

39  
40 PH due to valvular heart disease (VHD) was not always related to mortality risk (34, 35, 40, 41,  
41  
42 47), which is in contrast with PH in patients with heart failure. A simple explanation of this  
43  
44 difference could be that the prevalence and severity of PH correlates with the severity and type of  
45  
46 VHD. Though mitral stenosis (MS) has been the classical disease associated with PH-LHD and  
47  
48 reactive PH was initially described in these patients(4), it is however noticeable that PH due to  
49  
50 MS has received little attention over the last decade, probably because of the progressive decline  
51  
52 in RHD in western countries. Interestingly, the two studies included showed that surgery was safe  
53  
54 and improved survival in patients with PH due to MS(18, 19), with PH regressing to normal  
55  
56  
57  
58  
59  
60

1  
2  
3 levels over 6-12 months after successful Mitral Balloon Valvotomy (MBV)(19). In mitral  
4  
5 regurgitation (MR), nearly all cohort studies on outcomes of severe PH reported increase  
6  
7 mortality (3, 7, 38, 39, 42, 48). The relevance of this finding is that PH can serve both as an  
8  
9 indication for proceeding to surgical or catheter-based interventions, and also as an operative risk  
10  
11 factor for mitral valve interventions (20). By contrast, PH is not as common in the aortic valve  
12  
13 surgical cohort. Mortality rates in different studies of patients with VHD depends on  
14  
15 comorbidities, exclusion criteria, and definition for PH. Studies that also evaluated changes in PH  
16  
17 following valve surgery showed a decline in pulmonary pressures following surgery (19, 21-23).  
18  
19 It is worth noting that the pathophysiology of the pulmonary vasculature in PH due to VHD is  
20  
21 similar to that in patients with HF (1).  
22  
23  
24  
25  
26

27 The paucity of information on the effect of PH-LHD on hospitalizations or re- hospitalizations as  
28  
29 showed in this study highlights the need for more evidence on this outcome. Such information is  
30  
31 important to fully characterize and quantify the contribution of PH-LHD to the global burden of  
32  
33 disease, and assess future improvement from treating the underlying LHD and or controlling PH  
34  
35 in patients with LHD.  
36  
37

38 Of the 35 other potential prognostic factors of mortality in patients with PH that were tested in  
39  
40 multivariable models across studies, investigations on echocardiographic parameters suggested  
41  
42 that PH>60 mm Hg was associated with worse mortality in 7 out of 9 studies. Similarly, a greater  
43  
44 degree of MR, deceleration time when reported (28) and RV function were almost constantly  
45  
46 associated with adverse outcome while LVEF was associated with adverse outcome in 6 of 10  
47  
48 studies. In the evolution of LHD, RV dysfunction usually occurs as a turning point. It shall be  
49  
50 noted that PH incorporates information on diastolic function, MR and pulmonary vascular  
51  
52 disease, and this might explain the pivotal role of PH in gauging the prognosis of patients with  
53  
54 HF.  
55  
56  
57  
58  
59  
60



### ***Strengths and limitations of the studies included in the review***

The first limitation of the studies included in our review is the possibility of study population bias. The majority of studies originated from Western countries and included predominantly Caucasians and reported mostly on PH-LHD in a population with high prevalence of ischemic heart disease. This precludes the generalizability of our findings to developing countries where etiologies of left heart diseases are less of ischemic origin and are more dominated by systemic hypertension, dilated cardiomyopathies and RHD in a younger population (24). Therefore PH-LHD may have a different prognosis in developing countries. Secondly, there was a multiplicity of PH definitions based both on RHC and echocardiography parameters, limiting any possibility of pooling. Finally, readmissions were not frequently reported and multivariable analysis when performed was characterized by a great heterogeneity in the number and range of candidate predictors included in the models, thus limiting interpretation and generalizability. Therefore, findings on these other prognostic factors must be interpreted with caution. For studies that performed only univariate analysis, we cannot rule out the possibility that the reported factors may not preserve a significant association with the outcome once adjusted for the effect of other extraneous factors. In spite of these limitations, the majority of studies included were recent and all reported on the relation of PH-LHD with all-cause mortality, making the conclusions on this relation appropriate for contemporary Western populations.

### ***Strengths and limitations of the review***

First, by restricting our search strategy to full report articles published in English and French, and in journals available in the used electronic databases, we cannot rule out the possibility of language or publication bias. Secondly, we used the QUIPS instrument, designed for prognosis studies to address common sources of bias. The QUIPS, however, lacks discriminative power, henceforth we addressed this by using of the scoring algorithm suggested by de Jonge et al (6).



1  
2  
3 This scoring algorithm can still be subject to criticisms, especially because the cutoff points used  
4  
5 to determine the quality of the studies are quite arbitrary. Thirdly, because of important  
6  
7 heterogeneity in studies included, we were not able to pool data to perform a metaanalysis or to  
8  
9 stratify data by clinically important subgroups (such as mild, moderate, or severe PH). However,  
10  
11 to our knowledge, this is the first systematic review on determinants of hospitalizations and  
12  
13 mortality in patients with PH-LHD and the search strategy used allowed us to present in large the  
14  
15 results of more recent and high quality publications on the topic.  
16  
17  
18  
19  
20  
21

## 22 **CONCLUSION**

23  
24 The majority of studies included in this review showed that PH is an independent predictor of  
25  
26 mortality in patients with LHD, with the more consistent evidence being in those with HF and  
27  
28 MR. Information on readmission for heart failure was somehow very limited. The majority of this  
29  
30 information derives from studies in Western and developed countries, and may not apply to  
31  
32 populations in other settings. All together, these findings suggest that the hypothesis of targeting  
33  
34 PH to improve the outcomes of patients with left heart diseases should be actively investigated.  
35  
36  
37  
38  
39  
40

## 41 **Declaration of competing interest**

42  
43 None for all co-authors  
44  
45  
46  
47

## 48 **Authors 'contribution statement**

49  
50 Conceived and designed the protocol: AD and APK. Performed the literature search, selection  
51  
52 and quality assessment of the articles and extraction of data: AD, APK and KS. Interpreted the  
53  
54 data: AD, APK, FT and KS. Wrote the first draft of the manuscript: AD. Contributed to the  
55  
56  
57  
58  
59  
60

1  
2  
3 writing of the manuscript: AD, APK, KS and FT. Agree with manuscript results and  
4  
5 conclusions: AD, APK, FT and KS. All authors read and approved the final manuscript.  
6  
7

## 8 **Funding**

9  
10 None  
11  
12  
13

## 14 **References**

- 15  
16  
17 1. Fang JC, DeMarco T, Givertz MM, Borlaug BA, Lewis GD, Rame JE, et al. World Health  
18 Organization Pulmonary Hypertension group 2: pulmonary hypertension due to left heart disease in the  
19 adult--a summary statement from the Pulmonary Hypertension Council of the International Society for  
20 Heart and Lung Transplantation. *J Heart Lung Transplant*. 2012 Sep;31(9):913-33.  
21  
22
- 23 2. Simonneau G, Gatzoulis MA, Adatia I, Celermajer D, Denton C, Ghofrani A, et al. Updated  
24 clinical classification of pulmonary hypertension. *J Am Coll Cardiol*. 2013 Dec 24;62(25 Suppl):D34-41.  
25  
26
- 27 3. Guazzi M, Borlaug BA. Pulmonary hypertension due to left heart disease. *Circulation*. 2012 Aug  
28 21;126(8):975-90.  
29
- 30 4. Haddad F, Kudelko K, Mercier O, Vrtovec B, Zamanian RT, de Jesus Perez V. Pulmonary  
31 hypertension associated with left heart disease: characteristics, emerging concepts, and treatment  
32 strategies. *Prog Cardiovasc Dis*. 2011 Sep-Oct;54(2):154-67.  
33  
34
- 35 5. Segers VF, Brutsaert DL, De Keulenaer GW. Pulmonary hypertension and right heart failure in  
36 heart failure with preserved left ventricular ejection fraction: pathophysiology and natural history. *Curr*  
37 *Opin Cardiol*. 2012 May;27(3):273-80.  
38  
39
- 40 6. Vachery JL, Adir Y, Barbera JA, Champion H, Coghlan JG, Cottin V, et al. Pulmonary  
41 hypertension due to left heart diseases. *J Am Coll Cardiol*. 2013 Dec 24;62(25 Suppl):D100-8.  
42  
43
- 44 7. Parker MW, Mittleman MA, Waksmonski CA, Sanders G, Riley MF, Douglas PS, et al.  
45 Pulmonary hypertension and long-term mortality in aortic and mitral regurgitation. *Am J Med*. 2010  
46 Nov;123(11):1043-8.  
47
- 48 8. Adhyapak SM. Effect of right ventricular function and pulmonary pressures on heart failure  
49 prognosis. *Prev Cardiol*. 2010;13(2):72-7.  
50  
51
- 52 9. Hayden JA, Cote P, Bombardier C. Evaluation of the quality of prognosis studies in systematic  
53 reviews. *Ann Intern Med*. 2006 Mar 21;144(6):427-37.  
54  
55  
56  
57  
58  
59  
60

10. de Jonge RC, van Furth AM, Wassenaar M, Gemke RJ, Terwee CB. Predicting sequelae and death after bacterial meningitis in childhood: a systematic review of prognostic studies. *BMC Infect Dis.* 2010;10:232.
11. Barbieri A, Bursi F, Grigioni F, Tribouilloy C, Avierinos JF, Michelena HI, et al. Prognostic and therapeutic implications of pulmonary hypertension complicating degenerative mitral regurgitation due to flail leaflet: a multicenter long-term international study. *Eur Heart J.* 2011 Mar;32(6):751-9.
12. Khush KK, Tasissa G, Butler J, McGlothlin D, De Marco T. Effect of pulmonary hypertension on clinical outcomes in advanced heart failure: Analysis of the Evaluation Study of Congestive Heart Failure and Pulmonary Artery Catheterization Effectiveness (ESCAPE) database. *American Heart Journal.* 2009;157(6):1026-34.
13. Bursi F, McNallan SM, Redfield MM, Nkomo VT, Lam CSP, Weston SA, et al. Pulmonary Pressures and Death in Heart Failure A Community Study. *Journal of the American College of Cardiology.* 2012;59(3):222-31.
14. Lam CSP, Roger VL, Rodeheffer RJ, Borlaug BA, Enders FT, Redfield MM. Pulmonary Hypertension in Heart Failure With Preserved Ejection Fraction: A Community-Based Study. *Journal of the American College of Cardiology.* 2009;53(13):1119-26.
15. Strange G, Playford D, Stewart S, Deague JA, Nelson H, Kent A, et al. Pulmonary hypertension: prevalence and mortality in the Armadale echocardiography cohort. *Heart.* 2012 Dec;98(24):1805-11.
16. Damy T, Goode KM, Kallvikbacka-Bennett A, Lewinter C, Hobkirk J, Nikitin NP, et al. Determinants and prognostic value of pulmonary arterial pressure in patients with chronic heart failure. *Eur Heart J.* 2010 Sep;31(18):2280-90.
17. Wang D, Han Y, Zang H, Yu H, Wang S, Wang Z, et al. Prognostic effects of pulmonary hypertension in patients undergoing cardiac resynchronization therapy. *Journal of Thoracic Disease.* 2010;2(2):71-5.
18. Ward C, Hancock BW. Extreme pulmonary hypertension caused by mitral valve disease. Natural history and results of surgery. *Br Heart J.* 1975 Jan;37(1):74-8.
19. Fawzy ME, Hassan W, Stefadouros M, Moursi M, El Shaer F, Chaudhary MA. Prevalence and fate of severe pulmonary hypertension in 559 consecutive patients with severe rheumatic mitral stenosis undergoing mitral balloon valvotomy. *J Heart Valve Dis.* 2004 Nov;13(6):942-7; discussion 7-8.
20. Vahanian A, Alfieri O, Andreotti F, Antunes MJ, Baron-Esquivias G, Baumgartner H, et al. [Guidelines on the management of valvular heart disease (version 2012). The Joint Task Force on the Management of Valvular Heart Disease of the European Society of Cardiology (ESC) and the European Association for Cardio-Thoracic Surgery (EACTS)]. *G Ital Cardiol (Rome).* 2013 Mar;14(3):167-214.

- 1  
2  
3 21. Ben-Dor I, Goldstein SA, Pichard AD, Satler LF, Maluenda G, Li Y, et al. Clinical profile,  
4 prognostic implication, and response to treatment of pulmonary hypertension in patients with severe aortic  
5 stenosis. *Am J Cardiol.* 2011 Apr 1;107(7):1046-51.  
6  
7
- 8 22. Cam A, Goel SS, Agarwal S, Menon V, Svensson LG, Tuzcu EM, et al. Prognostic implications  
9 of pulmonary hypertension in patients with severe aortic stenosis. *J Thorac Cardiovasc Surg.* 2011  
10 Oct;142(4):800-8.  
11
- 12 23. Goldstone AB, Chikwe J, Pinney SP, Anyanwu AC, Funt SA, Polanco A, et al. Incidence,  
13 epidemiology, and prognosis of residual pulmonary hypertension after mitral valve repair for degenerative  
14 mitral regurgitation. *Am J Cardiol.* 2011 Mar 1;107(5):755-60.  
15
- 16 24. Damasceno A, Mayosi BM, Sani M, Ogah OS, Mondo C, Ojji D, et al. The causes, treatment, and  
17 outcome of acute heart failure in 1006 Africans from 9 countries. *Arch Intern Med.* 2012 Oct  
18 8;172(18):1386-94.  
19
- 20 25. Merlos P, Nunez J, Sanchis J, Minana G, Palau P, Bodi V, et al. Echocardiographic estimation of  
21 pulmonary arterial systolic pressure in acute heart failure. Prognostic implications. *Eur J Intern Med.*  
22 2013;24(6):562-7.  
23
- 24 26. Agarwal R, Shah SJ, Foreman AJ, Glassner C, Bartolome SD, Safdar Z, et al. Risk assessment in  
25 pulmonary hypertension associated with heart failure and preserved ejection fraction. *J Heart Lung*  
26 *Transplant.* 2012 May;31(5):467-77.  
27
- 28 27. Agarwal R. Prevalence, determinants and prognosis of pulmonary hypertension among  
29 hemodialysis patients. *Nephrol Dial Transplant.* 2012 Oct;27(10):3908-14.  
30
- 31 28. Aronson D, Eitan A, Dragu R, Burger AJ. Relationship between reactive pulmonary hypertension  
32 and mortality in patients with acute decompensated heart failure. *Circ Heart Fail.* 2011 Sep;4(5):644-50.  
33
- 34 29. Mutlak D, Aronson D, Carasso S, Lessick J, Reisner SA, Agmon Y. Frequency, determinants and  
35 outcome of pulmonary hypertension in patients with aortic valve stenosis. *Am J Med Sci.* 2012  
36 May;343(5):397-401.  
37
- 38 30. Tatebe S, Fukumoto Y, Sugimura K, Miyamichi-Yamamoto S, Aoki T, Miura Y, et al. Clinical  
39 significance of reactive post-capillary pulmonary hypertension in patients with left heart disease. *Circ J.*  
40 2012;76(5):1235-44.  
41
- 42 31. Stern J, Heist EK, Murray L, Alabiad C, Chung J, Picard MH, et al. Elevated estimated pulmonary  
43 artery systolic pressure is associated with an adverse clinical outcome in patients receiving cardiac  
44 resynchronization therapy. *Pacing Clin Electrophysiol.* 2007 May;30(5):603-7.  
45
- 46 32. Lee WT, Peacock AJ, Johnson MK. The role of per cent predicted 6-min walk distance in  
47 pulmonary arterial hypertension. *Eur Respir J.* 2010 Dec;36(6):1294-301.  
48  
49  
50  
51  
52  
53  
54  
55  
56  
57  
58  
59  
60

- 1  
2  
3 33. Moller JE, Hillis GS, Oh JK, Pellikka PA. Prognostic importance of secondary pulmonary  
4 hypertension after acute myocardial infarction. *Am J Cardiol.* 2005 Jul 15;96(2):199-203.  
5  
6 34. Cappola TP, Felker GM, Kao WH, Hare JM, Baughman KL, Kasper EK. Pulmonary hypertension  
7 and risk of death in cardiomyopathy: patients with myocarditis are at higher risk. *Circulation.* 2002 Apr  
8 9;105(14):1663-8.  
9  
10 35. Szejkowski BR, Elder DH, Shearer F, Jack D, Choy AM, Pringle SD, et al. Pulmonary  
11 hypertension predicts all-cause mortality in patients with heart failure: a retrospective cohort study. *Eur J*  
12 *Heart Fail.* 2012 Feb;14(2):162-7.  
13  
14 36. Abramson SV, Burke JF, Kelly JJ, Jr., Kitchen JG, 3rd, Dougherty MJ, Yih DF, et al. Pulmonary  
15 hypertension predicts mortality and morbidity in patients with dilated cardiomyopathy. *Ann Intern Med.*  
16 1992 Jun 1;116(11):888-95.  
17  
18 37. Kjaergaard J, Akkan D, Iversen KK, Kjoller E, Kober L, Torp-Pedersen C, et al. Prognostic  
19 importance of pulmonary hypertension in patients with heart failure. *Am J Cardiol.* 2007 Apr  
20 15;99(8):1146-50.  
21  
22 38. Shalaby A, Voigt A, El-Saed A, Saba S. Usefulness of Pulmonary Artery Pressure by  
23 Echocardiography to Predict Outcome in Patients Receiving Cardiac Resynchronization Therapy Heart  
24 Failure. *The American Journal of Cardiology.* 2008;101(2):238-41.  
25  
26 39. Ristow B, Ali S, Ren X, Whooley MA, Schiller NB. Elevated pulmonary artery pressure by  
27 Doppler echocardiography predicts hospitalization for heart failure and mortality in ambulatory stable  
28 coronary artery disease: the Heart and Soul Study. *J Am Coll Cardiol.* 2007 Jan 2;49(1):43-9.  
29  
30 40. Grigioni F, Potena L, Galie N, Fallani F, Bigliardi M, Coccolo F, et al. Prognostic implications of  
31 serial assessments of pulmonary hypertension in severe chronic heart failure. *J Heart Lung Transplant.*  
32 2006 Oct;25(10):1241-6.  
33  
34 41. Levine TB, Levine AB, Goldberg D, Narins B, Goldstein S, Lesch M. Impact of medical therapy  
35 on pulmonary hypertension in patients with congestive heart failure awaiting cardiac transplantation. *Am J*  
36 *Cardiol.* 1996 Aug 15;78(4):440-3.  
37  
38 42. Ghio S, Gavazzi A, Campana C, Inserra C, Klersy C, Sebastiani R, et al. Independent and additive  
39 prognostic value of right ventricular systolic function and pulmonary artery pressure in patients with  
40 chronic heart failure. *Journal of the American College of Cardiology.* 2001;37(1):183-8.  
41  
42 43. Ghio S, Temporelli PL, Klersy C, Simioniu A, Girardi B, Scelsi L, et al. Prognostic relevance of  
43 a non-invasive evaluation of right ventricular function and pulmonary artery pressure in patients with  
44 chronic heart failure. *European Journal of Heart Failure.* 2013 April 1, 2013;15(4):408-14.  
45  
46 44. Naidoo DP, Mitha AS, Vythilingum S, Chetty S. Pulmonary hypertension in aortic regurgitation:  
47 early surgical outcome. *Q J Med.* 1991 Jul;80(291):589-95.  
48  
49  
50  
51  
52  
53  
54  
55  
56  
57  
58  
59  
60

- 1  
2  
3 45. Roselli EE, Abdel Azim A, Houghtaling PL, Jaber WA, Blackstone EH. Pulmonary hypertension  
4 is associated with worse early and late outcomes after aortic valve replacement: implications for  
5 transcatheter aortic valve replacement. *J Thorac Cardiovasc Surg.* 2012 Nov;144(5):1067-74 e2.  
6  
7  
8 46. Melby SJ, Moon MR, Lindman BR, Bailey MS, Hill LL, Damiano RJ, Jr. Impact of pulmonary  
9 hypertension on outcomes after aortic valve replacement for aortic valve stenosis. *J Thorac Cardiovasc*  
10 *Surg.* 2011 Jun;141(6):1424-30.  
11  
12 47. Le Tourneau T, Richardson M, Juthier F, Modine T, Fayad G, Polge AS, et al. Echocardiography  
13 predictors and prognostic value of pulmonary artery systolic pressure in chronic organic mitral  
14 regurgitation. *Heart.* 2010 Aug;96(16):1311-7.  
15  
16 48. Kainuma S, Taniguchi K, Toda K, Funatsu T, Kondoh H, Nishino M, et al. Pulmonary  
17 hypertension predicts adverse cardiac events after restrictive mitral annuloplasty for severe functional  
18 mitral regurgitation. *J Thorac Cardiovasc Surg.* 2011 Oct;142(4):783-92.  
19  
20 49. Manners JM, Monro JL, Ross JK. Pulmonary hypertension in mitral valve disease: 56 surgical  
21 patients reviewed. *Thorax.* 1977 Dec;32(6):691-6.  
22  
23 50. Malouf JF, Enriquez-Sarano M, Pellikka PA, Oh JK, Bailey KR, Chandrasekaran K, et al. Severe  
24 pulmonary hypertension in patients with severe aortic valve stenosis: clinical profile and prognostic  
25 implications. *J Am Coll Cardiol.* 2002 Aug 21;40(4):789-95.  
26  
27 51. Khandhar S, Varadarajan P, Turk R, Sampat U, Patel R, Kamath A, et al. Survival benefit of  
28 aortic valve replacement in patients with severe aortic regurgitation and pulmonary hypertension. *Ann*  
29 *Thorac Surg.* 2009 Sep;88(3):752-6.  
30  
31 52. Zuern CS, Eick C, Rizas K, Stoleriu C, Woernle B, Wildhirt S, et al. Prognostic value of mild-to-  
32 moderate pulmonary hypertension in patients with severe aortic valve stenosis undergoing aortic valve  
33 replacement. *Clin Res Cardiol.* 2012 Feb;101(2):81-8.  
34  
35 53. Yang C, Li D, Mennett R, Hammond J, Zhang G, Chen D, et al. The impact of pulmonary  
36 hypertension on outcomes of patients with low left ventricular ejection fraction: a propensity analysis. *J*  
37 *Heart Valve Dis.* 2012 Nov;21(6):767-73.  
38  
39 54. Nozohoor S, Hyllen S, Meurling C, Wierup P, Sjogren J. Prognostic value of pulmonary  
40 hypertension in patients undergoing surgery for degenerative mitral valve disease with leaflet prolapse. *J*  
41 *Card Surg.* 2012 Nov;27(6):668-75.  
42  
43 55. Ghoreishi M, Evans CF, DeFilippi CR, Hobbs G, Young CA, Griffith BP, et al. Pulmonary  
44 hypertension adversely affects short- and long-term survival after mitral valve operation for mitral  
45 regurgitation: implications for timing of surgery. *J Thorac Cardiovasc Surg.* 2011 Dec;142(6):1439-52.  
46  
47  
48  
49  
50  
51  
52  
53  
54  
55  
56  
57  
58  
59  
60

- 1  
2  
3 56. Pai RG, Varadarajan P, Kapoor N, Bansal RC. Aortic valve replacement improves survival in  
4 severe aortic stenosis associated with severe pulmonary hypertension. Ann Thorac Surg. 2007  
5  
6 Jul;84(1):80-5.  
7  
8  
9  
10  
11  
12  
13  
14  
15  
16  
17  
18  
19  
20  
21  
22  
23  
24  
25  
26  
27  
28  
29  
30  
31  
32  
33  
34  
35  
36  
37  
38  
39  
40  
41  
42  
43  
44  
45  
46  
47  
48  
49  
50  
51  
52  
53  
54  
55  
56  
57  
58  
59  
60

For peer review only



**Table 1: Results of quality assessment of studies on mortality and readmissions for heart failure in patients with pulmonary hypertension associated with left heart disease**

| Nº  | Study                       | Country/<br>Ethnicity                            | Design                                    | Statistical<br>methods              | Study<br>participation | Study<br>attrition | Measurement<br>of prognostic<br>factors | Assessment<br>of<br>outcomes | Statistical<br>analysis and<br>presentation | Quality<br>score<br>(points) | Quality:<br>+ = high<br>+/- =<br>moderate<br>- = low |
|-----|-----------------------------|--------------------------------------------------|-------------------------------------------|-------------------------------------|------------------------|--------------------|-----------------------------------------|------------------------------|---------------------------------------------|------------------------------|------------------------------------------------------|
| 1.  | Merlos et al, 2013(25)      | Spain                                            | Prospective hospital based cohort         | KM, Cox regression                  | 13.5                   | 15                 | 10                                      | 15                           | 15                                          | 68.5                         | +                                                    |
| 2.  | Agawal et al, 2012(26)      | USA – ethnicity data in 98 patients (63% whites) | Retrospective hospital based cohort       | KM, Cox regression                  | 13.5                   | 7.5                | 12.5                                    | 15                           | 15                                          | 63.5                         | +                                                    |
| 3.  | Agawal R, 2012(27)          | USA – 96% blacks                                 | Prospective hospital based cohort         | KM, Cox regression                  | 12                     | 10                 | 10                                      | 15                           | 15                                          | 62                           | +                                                    |
| 4.  | Aronson et al, 2011(28)     | USA                                              | Prospective hospital based cohort         | Cox regression                      | 15                     | 15                 | 15                                      | 15                           | 12.5                                        | 72.5                         | +                                                    |
| 5.  | Bursi et al, 2012(13)       | USA - Caucasian and blacks                       | Prospective population based cohort study | KM, Logistic regression             | 15                     | 12.5               | 12.5                                    | 12.5                         | 15                                          | 65                           | +                                                    |
| 6.  | Strange et al, 2012(15)     | Armadale-Australia                               | Retrospective population based cohort     | KM, Logistic and cox regression     | 15                     | 7.5                | 10                                      | 12.5                         | 12.5                                        | 58.5                         | +/-                                                  |
| 7.  | Mutlak et al, 2012(29)      | USA                                              | Prospective hospital based cohort         | KM, Logistic and cox regression, KM | 13.5                   | 15                 | 10                                      | 15                           | 15                                          | 69                           | +                                                    |
| 8.  | Tatebe et al, 2012(30)      | Japan                                            | Prospective hospital based cohort         | KM, Logistic and cox regression     | 15                     | 10                 | 15                                      | 15                           | 15                                          | 72.5                         | +                                                    |
| 9.  | Adhyapak et al, 2010(8)     | India                                            | Prospective hospital based cohort         | Cox regression                      | 13.5                   | 10                 | 10                                      | 12.5                         | 5                                           | 53.5                         | +/-                                                  |
| 10. | Stern et al, 2007(31)       | USA                                              | Retrospective hospital based cohort       | KM, Cox regression                  | 13.5                   | 15                 | 12.5                                    | 12.5                         | 12.5                                        | 66                           | +                                                    |
| 11. | Lee et al, 2010(32)         | Korea                                            | Prospective hospital based cohort         | KM, Cox regression                  | 15                     | 15                 | 15                                      | 12.5                         | 15                                          | 72.5                         | +                                                    |
| 12. | Møller et al, 2005(33)      | USA                                              | Prospective hospital based cohort         | KM, Logistic regression             | 13.5                   | 15                 | 12.5                                    | 15                           | 15                                          | 71                           | +                                                    |
| 13. | Cappola et al, 2012(34)     | USA, 35% black and 65% whites                    | Prospective hospital based cohort         | KM, Cox regression                  | 13.5                   | 7.5                | 12.5                                    | 15                           | 15                                          | 62.5                         | +                                                    |
| 14. | Szwejkowski et al, 2011(35) | UK                                               | Retrospective hospital based cohort       | KM, Cox regression                  | 13.5                   | 10                 | 10                                      | 15                           | 15                                          | 61                           | +                                                    |
| 15. | Abramson et al, 1992(36)    | USA                                              | Prospective hospital based cohort         | KM, Cox regression                  | 12                     | 15                 | 10                                      | 15                           | 12.5                                        | 64.5                         | +                                                    |
| 16. | Kjaergaard et               | Denmark                                          | Prospective hospital                      | KM, Cox                             | 13.5                   | 15                 | 12.5                                    | 15                           | 15                                          | 71                           | +                                                    |



|     |                                            |                                      |                                                           |                                                           |      |      |      |      |      |      |     |
|-----|--------------------------------------------|--------------------------------------|-----------------------------------------------------------|-----------------------------------------------------------|------|------|------|------|------|------|-----|
| 17. | al, 2007(37)<br>Shalaby et al,<br>2008(38) | USA, 95%<br>Caucasians               | based cohort<br>Retrospective<br>hospital based<br>cohort | regression<br>KM, Cox<br>regression                       | 13.5 | 12.5 | 15   | 15   | 15   | 71   | +   |
| 18. | Damy et al,<br>2010(16)                    | United<br>Kingdom                    | Prospective hospital<br>based cohort                      | KM, logistic and<br>Cox regression                        | 15   | 10   | 15   | 15   | 15   | 70   | +   |
| 19. | Ristow et al,<br>2007(39)                  | USA                                  | Prospective hospital<br>based cohort                      | Logistic<br>regression                                    | 13.5 | 12.5 | 10   | 15   | 5    | 48.5 | +/- |
| 20. | Grigioni et al,<br>2006(40)                | Italy                                | Retrospective<br>cohort                                   | KM, logistic<br>regression                                | 13.5 | 12.5 | 12.5 | 15   | 15   | 68.5 | +/- |
| 21. | Levine et al,<br>1996(41)                  | USA, mainly<br>Caucasians<br>(78.3%) | Retrospective<br>cohort                                   | No logistic<br>regression, no KM<br>analysis              | 12   | 10   | 10   | 7.5  | 2.5  | 42   | -   |
| 22. | Lam et al,<br>2010(14)                     | USA                                  | Prospective<br>observational<br>community based<br>cohort | KM, Logistic<br>regression                                | 12   | 15   | 10   | 15   | 12.5 | 68   | +   |
| 23. | Kush et al,<br>2009(12)                    | Multicentric<br>USA and<br>Canada    | Prospective cohort<br>in the ESCAPE trial                 | KM                                                        | 15   | 10   | 15   | 15   | 12.5 | 68.5 | +   |
| 24. | Ghio et al,<br>2001(42)                    | Italy                                | Prospective cohort                                        | KM, Cox<br>regression                                     | 13.5 | 12.5 | 12.5 | 12.5 | 12.5 | 63.5 | +   |
| 25. | Wang et al,<br>2010(17)                    | China                                | Retrospective<br>cohort                                   | KM                                                        | 12   | 12.5 | 12.5 | 12.5 | 5    | 54.5 | +/- |
| 26. | Ghio et al,<br>2013(43)                    | Italy                                | Prospective cohort                                        | KM, Cox and<br>logistic regression                        | 13.5 | 10   | 10   | 15   | 15   | 63.5 | +   |
| 27. | Naidoo et al,<br>1991(44)                  | South Africa,<br>Blacks              | Retrospective<br>cohort                                   | No logistic<br>regression, no<br>Kaplan Meier<br>analysis | 12   | 7.5  | 10   | 5    | 7.5  | 42   | -   |
| 28. | Fawzy et al,<br>2004(19)                   | Saudi Arabia                         | Prospective cohort                                        | No logistic<br>regression, no<br>Kaplan Meier             | 12   | 10   | 12.5 | 15   | 7.5  | 57   | +/- |
| 29. | Roseli et al,<br>2002(45)                  | USA                                  | Retrospective<br>hospital based<br>cohort                 | KM, Cox<br>regression                                     | 13.5 | 10   | 10   | 15   | 12.5 | 63.5 | +/- |
| 30. | Melby et al,<br>2011(46)                   | USA                                  | Retrospective<br>hospital based<br>cohort                 | KM, Cox<br>regression                                     | 13.5 | 12.5 | 10   | 15   | 15   | 66   | +   |
| 31. | Le Tourneau et<br>al, 2010(47)             | France,<br>mainly<br>Caucasians      | Prospective hospital<br>based cohort                      | KM, Cox<br>regression                                     | 13.5 | 10   | 10   | 15   | 15   | 63.5 | +   |
| 32. | Parker et al,<br>2010(7)                   | USA                                  | Retrospective<br>hospital based<br>cohort                 | KM, Cox<br>regression                                     | 12   | 15   | 12.5 | 15   | 15   | 71   | +   |
| 33. | Kainuma et al,<br>2011(48)                 | Japan, Asians                        | Retrospective<br>hospital based<br>cohort                 | KM, Cox<br>regression                                     | 10.5 | 10   | 12.5 | 12.5 | 10   | 55.5 | +/- |
| 34. | Barbieri et al,<br>2010(11)                | Multicentric<br>(Europe and<br>USA)  | Prospective hospital<br>based cohort                      | KM, Cox<br>regression                                     | 13.5 | 15   | 12.5 | 15   | 15   | 71   | +   |

|     |                           |               |                                     |                                          |      |     |     |      |      |      |     |
|-----|---------------------------|---------------|-------------------------------------|------------------------------------------|------|-----|-----|------|------|------|-----|
| 35. | Manners et al, 1977(49)   | United Kindom | Retrospective hospital based cohort | No regression analysis, no KM estimation | 10.5 | 7.5 | 5   | 5    | 2.5  | 30.5 | -   |
| 36. | Malouf et al, 2002(50)    | USA           | Prospective hospital based cohort   | KM, Cox and logistic regression          | 10.5 | 10  | 10  | 15   | 12.5 | 58   | +   |
| 37. | Khandhar et al, 2009(51)  | USA           | Retrospective hospital based cohort | KM, Cox regression                       | 13.5 | 10  | 10  | 15   | 12.5 | 61   | +/- |
| 38. | Zuern et al, 2012(52)     | Germany       | Prospective hospital based cohort   | KM, Cox regression                       | 15   | 7.5 | 10  | 15   | 15   | 62.5 | +   |
| 39. | Ben-Dor et al, 2011(21)   | USA           | Prospective hospital based cohort   | KM, Logistic regression                  | 15   | 10  | 10  | 15   | 15   | 68   | +   |
| 40. | Yang et al, 2012(53)      | USA           | Retrospective hospital based cohort | KM, Cox and logistic regression          | 15   | 7.5 | 15  | 12.5 | 15   | 65   | +   |
| 41. | Nozohoor et al, 2012(54)  | Sweden        | Retrospective cohort                | KM, Cox and logistic regression          | 13.5 | 10  | 10  | 15   | 12.5 | 61   | +   |
| 42. | Ward et al 1975(18)       | UK            | Retrospective cohort                | No KM, no logistic or Cox regression     | 12   | 5   | 2.5 | 7.5  | 2.5  | 29.5 | -   |
| 43. | Ghoreishi et al, 2012(55) | USA           | Retrospective cohort                | KM, Cox and logistic regression          | 15   | 10  | 10  | 10   | 15   | 60   | +   |
| 44. | Cam A et al, 2011(22)     | USA           | Retrospective cohort                | KM, Cox and logistic regression          | 13.5 | 15  | 10  | 10   | 12.5 | 61   | +   |
| 45. | Pai et al, 2007(56)       | USA           | Retrospective cohort                | KM, Cox and logistic regression          | 15   | 10  | 10  | 10   | 15   | 60   | +   |

---

KM: Kaplan Meier; UK: United Kindom; USA:United states of America

**Table 2: Study characteristics of studies on mortality and readmissions for heart failure in patients with pulmonary hypertension associated with left heart disease**

| Author, Year published                                             | Diagnostic criteria (RVSP by echocardiography or mPAP by echocardiography or RHC) | Study population (sample size, heart disease, NYHA class, type of HF)                                                                        | Mean / Median follow up (months) | Age- Years / Male sex-%  | Definition of outcomes predicted          | Proportion (%) of measurable RVSP | Median/ Mean (mm Hg) baseline RVSP (echo) or mPAP (RHC) | Prevalence of PH at baseline (%) | HF readmission rate or adjusted Odd/Hazard ratios and CI | Mortality (all cause) rate at 6, 12, 24, 36 months or at mean duration of follow up |                                       |              |                                | Adjusted odd/Hazard ratios and CI (or p value) for all-cause mortality, outcome            |
|--------------------------------------------------------------------|-----------------------------------------------------------------------------------|----------------------------------------------------------------------------------------------------------------------------------------------|----------------------------------|--------------------------|-------------------------------------------|-----------------------------------|---------------------------------------------------------|----------------------------------|----------------------------------------------------------|-------------------------------------------------------------------------------------|---------------------------------------|--------------|--------------------------------|--------------------------------------------------------------------------------------------|
|                                                                    |                                                                                   |                                                                                                                                              |                                  |                          |                                           |                                   |                                                         |                                  |                                                          | 6                                                                                   | 12                                    | 24           | 36 or at mean/median follow up |                                                                                            |
| <b>Studies in patients with heart failure and cardiomyopathies</b> |                                                                                   |                                                                                                                                              |                                  |                          |                                           |                                   |                                                         |                                  |                                                          |                                                                                     |                                       |              |                                |                                                                                            |
| Merlos et al, 2013(25)                                             | RVSP>35 mm Hg                                                                     | 1210 consecutive patients with HF, stratified into normal (RVSP<35), mild (RVSP 36-45), moderate (RVSP 46-60) and severe PH (RVSP >60 mm Hg) | 12                               | 72.6 / 54.1%             | All cause mortality Cardiovascular deaths | 41.5                              | 46                                                      | 35.2                             | NR                                                       | NR                                                                                  | 4.89 per 10 person-years in severe PH | NA           | NA                             | OR for mild PH 1.6 (0.7-3.74), moderate PH 1.34 (0.54-3.16) and severe PH 2.57 (1.07-6.27) |
| Agawal et al, 2012(26)                                             | RHC with mPAP>25 mm Hg                                                            | 339 patients with PH and LHD, 90% with HFpEF, NYHA class NR                                                                                  | 54.2                             | 63 / 21%                 | All cause mortality                       | NA                                | 43                                                      | NA                               | NR                                                       | NR                                                                                  | 2.9%                                  | 4.4%         | 6.8%                           | UTSW cohort HR 1.4 (1.1-1.9) and NU cohort HR 1.4 (1.1-1.7)                                |
| Agawal, 2012(27)                                                   | RVSP>35                                                                           | 288 patients undergoing hemodialysis stratified into PH and NPH-based on RVSP                                                                | 25.8                             | 56.5 vs 53.1 / 65 vs 63% | All cause mortality                       | NA                                | 44.7 vs 27.2                                            | 38                               | NR                                                       | NR                                                                                  | 26.4 vs 24.5                          | 48.3 vs 46.3 | 62.9 vs 56.3                   | HR 2.17 (1.31-3.61)                                                                        |

|                                                                                                                                                                                                                                                                                           |                         |                                                |                                                                                                                                           |    |                     |                                        |    |                |      |                                |                    |                                                      |               |                         |                                                                    |
|-------------------------------------------------------------------------------------------------------------------------------------------------------------------------------------------------------------------------------------------------------------------------------------------|-------------------------|------------------------------------------------|-------------------------------------------------------------------------------------------------------------------------------------------|----|---------------------|----------------------------------------|----|----------------|------|--------------------------------|--------------------|------------------------------------------------------|---------------|-------------------------|--------------------------------------------------------------------|
| 1<br>2<br>3<br>4<br>5<br>6<br>7<br>8<br>9<br>10<br>11<br>12<br>13<br>14<br>15<br>16<br>17<br>18<br>19<br>20<br>21<br>22<br>23<br>24<br>25<br>26<br>27<br>28<br>29<br>30<br>31<br>32<br>33<br>34<br>35<br>36<br>37<br>38<br>39<br>40<br>41<br>42<br>43<br>44<br>45<br>46<br>47<br>48<br>49 | Aronson et al, 2011(28) | RHC with mPAP $\geq$ 25 mmHg<br>mPCWP >15 mmHg | 242 patients with acute HF, divided in 3 groups, NPH, passive PH and reactive PH, NYHA class IV                                           | 6  | 61; 42%             | All cause mortality                    | NA | 34 vs 38 vs 44 | 76.0 | NR                             | 8.6 vs 21. vs 48.3 | NR                                                   | NR            | NR                      | HR for passive PH 1.7 (0.6-4.5) and reactive PH 4.8 (2.1-17.5)     |
|                                                                                                                                                                                                                                                                                           | Bursi et al, 2012(13)   | RVSP > 35 mm Hg                                | 1049 patients with HF stratified into tertiles of RVSP                                                                                    | 81 | 76; 49.3%           | All cause mortality                    | NR | 48             | 79   | NA                             | NR                 | 4, 10, and 17% for tertiles 1, 2, and 3 respectively | 8 vs 19 vs 28 | 46*                     | HR for tertile 2: 1.45 (1.13-1.85) and tertile 3: 2.07 (1.62-2.64) |
|                                                                                                                                                                                                                                                                                           | Strange et al, 2012(15) | RVSP > 40 mm Hg                                | 15633 echo screening, 636 PH group 2 stratified into 3 groups (group 1 RVSP < 40 mm Hg, group 2 between 41 and 60 and group 3 > 60 mm Hg) | 83 | 79; 48%             | All cause mortality                    | NR | 52             | NR   | NA                             | NR                 | NR                                                   | NR            | Mean survival 4.2 years | NR                                                                 |
|                                                                                                                                                                                                                                                                                           | Mutlak et al, 2012(29)  | RVSP > 35 mm Hg                                | 1054 patients with acute myocardial infarction divided into NPH and PH groups                                                             | 12 | 60 vs 69; 77 vs 64% | Readmission for HF All cause mortality | NR | 32 vs 43       | 44.6 | 2.1 vs 9.2; OR 3.1 (1.87-5.14) | NR                 | NR                                                   | NR            | NR                      | HR for readmission 3.1 (1.87-5.14)                                 |

|                                                                                              |                        |                                                   |                                                                                                                                                                                                              |      |                             |                                                             |    |                                                                                           |      |                    |                                                              |                                                                  |                                                                  |                                                                    |                                           |
|----------------------------------------------------------------------------------------------|------------------------|---------------------------------------------------|--------------------------------------------------------------------------------------------------------------------------------------------------------------------------------------------------------------|------|-----------------------------|-------------------------------------------------------------|----|-------------------------------------------------------------------------------------------|------|--------------------|--------------------------------------------------------------|------------------------------------------------------------------|------------------------------------------------------------------|--------------------------------------------------------------------|-------------------------------------------|
| 1<br>2<br>3<br>4<br>5<br>6<br>7<br>8<br>9<br>10<br>11<br>12<br>13<br>14<br>15<br>16          | Tatebe et al, 2012(30) | RHC with mPAP $\geq$ 25 mmHg<br>mPCWP >15 mmHg    | 676 consecutive patients with chronic HF, NYHA class $\geq$ 2, stratified into 3 groups, NPH (mPAP<25), passive PH (PH with PVR $\geq$ 2.5 WU) or reactive PH (PH with PVR >2.5 WU)                          | 31.2 | 64vs 64vs 63; 63vs 48vs 66% | All cause mortalityand readmission for HF                   | NR | 17 vs 30 vs 35 in NPH, passive PH and reactive PH respectively                            | 23   | NR                 | NR                                                           | 24.5 vs 18 vs 18.9% in NPH, passive and reactive PH respectively | 52.5 vs 50 vs 60.3% in NPH, passive and reactive PH respectively | 71.0 vs 77 vs 79.3 in NPH, passive PH and reactive PH respectively | HR for reactive PH group 1.18 (1.03-1.35) |
| 17<br>18<br>19<br>20<br>21<br>22<br>23<br>24<br>25<br>26<br>27<br>28<br>29<br>30<br>31<br>32 | Adhyapak, 2010(8)      | Echocardiography with mPAP > 25 mm Hg             | 147 patients with HF stratified into: group 1, normal PASP/RV preserved RV function; group 2, normal PASP/RV dysfunction; group 3, high PASP/RV preserved RV function; and group 4, high PASP/RV dysfunction | 11.2 | 54 91.8%                    | Cardiac death Readmissions                                  | NR | Group 1 20 $\pm$ 5 group 2 24.8 $\pm$ 0.4 group 3 56.8 $\pm$ 6 and group 4 58.9 $\pm$ 8.8 | 53.7 | 19.7, OR and CI NR | Overall 5.1 at 11.2 months, 4.5 in group 3 vs 8.8 in group 4 | NA                                                               | NA                                                               | HR in PH 2.27 (1.09–3.57)                                          |                                           |
| 33<br>34<br>35<br>36<br>37<br>38<br>39<br>40<br>41<br>42<br>43<br>44<br>45                   | Stern et al, 2007(31)  | Echocardiography but criteria for PH not reported | 68 patients needing cardiac resynchronization stratified into group 1 (RVSP $\geq$ 50 mmHg, n = 27) and group 2(RVSP< 50 mmHg, n =                                                                           | 7.1  | 70 64.7%                    | composite of hospitalization for HF and all cause mortality | NR | Group 1 39.7 $\pm$ 6.7 and group 2 60.2 $\pm$ 9.2                                         | NR   | NR                 | NR                                                           | Increased mortality in patients with RVSP $\geq$ 50 mm Hg        | NR                                                               | NR                                                                 | HR of 2.0 (1.2-5.5) for RVSP $\geq$ 50    |

1  
2  
3  
4  
5  
6  
7  
8  
9  
10  
11  
12  
13  
14  
15  
16  
17  
18  
19  
20  
21  
22  
23  
24  
25  
26  
27  
28  
29  
30  
31  
32  
33  
34  
35  
36  
37  
38  
39  
40  
41  
42  
43  
44  
45  
46  
47  
48  
49

41)

|                         |                          |                                                                                                                                                                                      |      |                                                                                         |                     |    |                                                            |    |    |    |    |                                                        |                                                                      |                                                                      |
|-------------------------|--------------------------|--------------------------------------------------------------------------------------------------------------------------------------------------------------------------------------|------|-----------------------------------------------------------------------------------------|---------------------|----|------------------------------------------------------------|----|----|----|----|--------------------------------------------------------|----------------------------------------------------------------------|----------------------------------------------------------------------|
| Lee et al, 2010(32)     | RVSP>39 mm Hg            | 813 patients with TR stratified into two groups based on the RVSP < 39 mmHg (group 1, n = 530) and RVSP ≥ 39 mmHg (group 2, n = 283)                                                 | 58.8 | 64<br>42.5%                                                                             | All cause mortality | NR | 37.1 in patients who survived vs 43.8 in patients who died | NR | NR | NR | NR | 10.5 vs 21.9                                           | 5-year survival rates 61.0 and 80.6% group 2 vs group 1 respectively | HR of 1.024 (1.017–1.032)                                            |
| Møller et al, 2005(33)  | RVSP>30 mm Hg            | 536 patients with acute myocardial infarction stratified into group 1 (RVSP< 30 mm Hg), group 2 mild to moderate PH (RVSP of 31 to 55 mm Hg) and group 3 severe PH (RVSP > 55 mm Hg) | 40   | 65/<br>68%<br>74/54<br>%<br>78/44<br>% in<br>group<br>1, 2<br>and 3<br>respect<br>ively | All cause mortality | 69 | NR                                                         | 75 | NR | NR | NR | 5% in group 1<br>52% in patients with a RVSP>6 5 mm Hg | NR                                                                   | HR 1.22 (1.14–1.38) per 10 mm Hg increased                           |
| Cappola et al, 2012(34) | RHC with mPAP ≥ 25 mm Hg | 1134 patients with cardiomyopathy stratified according to PVR: NPH (<2.5), group1 PH (2.5-3), group2 PH (3-                                                                          | 52.8 | 48<br>60%                                                                               | All cause mortality | NA | 25                                                         | NR | NR | NR | NR | NR                                                     | 33% of patients died during the mean FU                              | HR 1.86 (1.30–2.65) for group2, 1.78 (1.13–2.81) for group3 and 2.04 |

|                             |                                                 |                                                                                                                                                                         |      |               |                                                                         |    |         |                                                           |                                               |    |                                        |    |                                           |                                                           |
|-----------------------------|-------------------------------------------------|-------------------------------------------------------------------------------------------------------------------------------------------------------------------------|------|---------------|-------------------------------------------------------------------------|----|---------|-----------------------------------------------------------|-----------------------------------------------|----|----------------------------------------|----|-------------------------------------------|-----------------------------------------------------------|
|                             |                                                 | 3.5), group3<br>PH(3.5-4) and<br>group4 PH<br>(>4)                                                                                                                      |      |               |                                                                         |    |         |                                                           |                                               |    |                                        |    |                                           | (1.51–<br>2.74) for<br>group4                             |
| Szwejkowski et al, 2011(35) | RVSP>33 mm Hg                                   | 1612 patients with HF stratified into 5 groups according to RVSP (< 33; 33-38; 39-44; 45-52 and >52 mmHg)                                                               | 33.6 | 75.2<br>57.4% | All cause mortality                                                     | 32 | 46      | 8(35)3.3                                                  | NR                                            | NR | NR                                     | NR | 55.1% of patients died during the mean FU | HR 1.06 (1.03-1.08) for every 5 mm Hg increase in RVSP    |
| Abramson et al, 1992(36)    | Echocardiography with TRV>2.5 m/s               | 108 patients with dilated cardiomyopathy, stratified into 2 groups: group 1 (TRV< 2.5 m/s) and group 2 (>2.5 m/s), 38.9% in NYHA class III and IV, 77.3% of ischemic HF | 28   | 67.5<br>81%   | All cause mortality, mortality due to HF and re-hospitalizations for HF | NR | 5.6 m/s | 26                                                        | 75% during the study period 5.76 (1.97-16.90) | NR | NR                                     | NR | 57% in 28 months vs 17%                   | OR for increased TRV 3.77 (1.38-10.24)                    |
| Kjaergaard et al, 2007(37)  | Echocardiography but cutoff for PH not reported | 388 consecutive patients with known or presumed HF stratified into quartiles of RVSP (<31, 31-38, 39-50, >50)                                                           | 33.6 | 75<br>60%     | All cause mortality                                                     | NR | 38      | 75% and 50% with RVSP> 31 mm Hg and 40 mm Hg respectively | NR                                            |    | 48% if COPD and 21% in HF without COPD | NR | 57% at 33.6 months                        | HR 1.09(1.04-1.14) for every increase of RVSP per 5 mm Hg |
| Shalaby et al, 2008(38)     | RVSP≥30 mm Hg                                   | 270 patients undergoing cardiac resynchronization stratified                                                                                                            | 19.4 | 66.5<br>91%   | All cause mortality, cardiac transplantation (primary                   | NR | 40.4    | NR                                                        | 40% in group 3 vs 9% in group 1 [6.35         | NR | NR                                     | NR | 12% in group 1 vs 34% in group 3 at mean  | HR 2.62 (1.07–6.41)                                       |

|                          |                                              |                                                                                                                                                                    |    |                                                 |                                                                               |                                                                |    |                                                           |                                                                                           |    |    |                           |                                        |                                                                                                         |
|--------------------------|----------------------------------------------|--------------------------------------------------------------------------------------------------------------------------------------------------------------------|----|-------------------------------------------------|-------------------------------------------------------------------------------|----------------------------------------------------------------|----|-----------------------------------------------------------|-------------------------------------------------------------------------------------------|----|----|---------------------------|----------------------------------------|---------------------------------------------------------------------------------------------------------|
|                          |                                              | into 3 groups on the basis of RVSP: group 1, (22 to 29, n= 86); group 2 (30 to 44, n=90) and group 3 (45 to 88, n=94).                                             |    |                                                 | end point) or re-hospitalization for HF                                       |                                                                |    |                                                           | (2.55–15.79)]                                                                             |    |    |                           |                                        | follow up                                                                                               |
| Damy et al, 2010(16)     | Echocardiography with RVTG >25 mm Hg         | 1380 patients with congestive HF, 1026 with LVSD (EF<45%) and 324 without), further stratified into quartiles of RVSP                                              | 66 | 72<br>67%                                       | All cause mortality                                                           | 30% of all, 26% in patients with LVSD and 40% in those without | 25 | 46% of HFpEF, 50% of HFrEF and 23% of patients without HF | NA (outpatient cohort)                                                                    | NR | NR | NR                        | 40.3% at median follow up of 66 months | HR 1.72(1.16–2.55) for RVSP>45 mm Hg)                                                                   |
| Ristow et al, 2007(39)   | Echocardiography with TR gradient > 30 mm Hg | 717 patients with coronary artery disease, 573 with measurable TR, stratified into group 1 (TR gradient≤30 mm Hg, n=447) and group 2 (TR gradient>30 mm Hg, n=126) | 36 | 65,<br>74%<br>(group 1) 69,<br>75%<br>(group 2) | hospitalization, CV death, all-cause death, and the combined end point of all | 80                                                             | NR | 22                                                        | 6% (group I) vs 21% (group II) OR per each 10 mm Hg increase of TR gradient 1.5(1.03-2.2) | NR | NR | NR                        | 11% (group I) vs 17% (group II)        | OR for all cause deaths 1.2(0.85-1.6) per 10 mm Hg increase in TR OR for combined endpoint 1.6(1.1-2.4) |
| Grigioni et al, 2006(40) | RHC with mPAP≥25 mm Hg                       | 196 patients with HF evaluated for PH and changes in mPAP                                                                                                          | 24 | 54<br>73%                                       | Cardiovascular deaths, acute HF and combined end point of both                | NA                                                             | 25 | NR                                                        | 27% acute HF, 2.30(1.4-2-3.73)                                                            | NR | NR | 20% cardiovascular deaths | NR                                     | HR for PH 2.3 (1.42-3.73) ; HR for worsening >30% in mPAP 2.6(1.45-4.67)                                |



|                                                                                                                      |                        |                                                                               |                                                                                                                                                                        |      |                                                       |                                            |                                         |                                                |                                        |                           |          |                                                  |                                                  |                                                                      |                                                        |
|----------------------------------------------------------------------------------------------------------------------|------------------------|-------------------------------------------------------------------------------|------------------------------------------------------------------------------------------------------------------------------------------------------------------------|------|-------------------------------------------------------|--------------------------------------------|-----------------------------------------|------------------------------------------------|----------------------------------------|---------------------------|----------|--------------------------------------------------|--------------------------------------------------|----------------------------------------------------------------------|--------------------------------------------------------|
| 1<br>2<br>3<br>4<br>5<br>6<br>7<br>8<br>9<br>10<br>11<br>12<br>13<br>14<br>15                                        | Levine et al, 1996(41) | RHC assessed change in PH, no definition                                      | 60 patients with PH owing to HF awaiting heart transplantation, stratified into 2 groups: group A (persistent elevated sPAP, n=31), group B (decrease in sPAP, n = 29) | 10   | 50<br>85%                                             | Transplant or all cause death              | NA                                      | 39 vs 57 in group A and group B respectively   | NA                                     | NR                        | NR       | NR                                               | NR                                               | 90% vs 50% of death at 10 months in group A and group B respectively | NR                                                     |
| 16<br>17<br>18<br>19<br>20<br>21<br>22<br>23<br>24<br>25<br>26<br>27<br>28<br>29                                     | Lam al, 2010(14)       | RVSP> 35 mm Hg                                                                | 244 patients with HFpEF compared with 719 subjects with HTN. 203 patients with HFpEF and PH later stratified into: group 1 (RVSP<48 mm Hg) and group 2 (RVSP>48 mm Hg) | 33.6 | 74/47 % vs 79*/41 % in group1 and group2 respectively | All cause mortality                        | 65 vs 83% in HTN and HFpEF respectively | 28 vs 48 mm Hg in HTN and HFpEF respectively   | 8 vs 83% in HTN and HFpEF respectively | NR                        | NR       | 12.2 vs 25.7 in group 1 and group 2 respectively | 18.4 vs 36.2 in group 1 and group 2 respectively | 55.1 vs 63.8 in group 1 and group 2 respectively                     | HR 1.20 per each increase of 10 mmHg in RVSP (p<0.001) |
| 30<br>31<br>32<br>33<br>34<br>35<br>36<br>37<br>38<br>39<br>40<br>41<br>42<br>43<br>44<br>45<br>46<br>47<br>48<br>49 | Kush et al, 2009(12)   | RHC with mixed PH (MPH) defined as mPAP≥25 mm Hg, PCWP>15 mm Hg, and PVR≥3 WU | 171 patients with severe HFpEF (NYHA class IV, LVEF≤30%, systolic BP ≤125 mm Hg) further stratified into 2 groups: MPH group (mPAP>25 mm Hg and PVR>3 WU,              | 6    | 59/75 % vs 54*/71 % in MPH and non-MPH respectively   | Rehospitalizations and all cause mortality | NA                                      | mPAP: 42 vs 32 in MPH and non-MPH respectively | 47                                     | HR for MPH 0.8(0.59-1.08) | 21 vs 22 | NR                                               | NR                                               | NR                                                                   | HR for MPH 0.89(0.66-1.20)                             |

1  
2  
3  
4  
5  
6  
7  
8  
9  
10  
11  
12  
13  
14  
15  
16  
17  
18  
19  
20  
21  
22  
23  
24  
25  
26  
27  
28  
29  
30  
31  
32  
33  
34  
35  
36  
37  
38  
39  
40  
41  
42  
43  
44  
45  
46  
47  
48  
49

|                      |                                                                     |                                                                                                                                                                                                       |           |            |                                                |    |      |      |    |                                                |    |    |                                                                |                                                                                                            |
|----------------------|---------------------------------------------------------------------|-------------------------------------------------------------------------------------------------------------------------------------------------------------------------------------------------------|-----------|------------|------------------------------------------------|----|------|------|----|------------------------------------------------|----|----|----------------------------------------------------------------|------------------------------------------------------------------------------------------------------------|
|                      |                                                                     | n= 80) and non-MPH (mPAP<25 mm Hg or PVR<3WU, n=91)                                                                                                                                                   |           |            |                                                |    |      |      |    |                                                |    |    |                                                                |                                                                                                            |
| Ghio et al, 2001(42) | RHC with mPAP≥20 mm Hg, RV systolic dysfunction defined as RVEF<35% | 377 patients with HF stratified into: group 1, normal mPAP/preserved RVEF (n=73); group 2 normal mPAP/low RVEF (n=68); group3, high PAP/preserved RVEF (n=21); and group 4, high PAP/low RVEF (n=215) | 17.2      | 51 85.7%   | Heart transplantati on and All cause mortality | NA | 27.9 | 62.3 | NR | NR                                             | NR | NR | 7.3 vs 12.3 vs 23.8 vs 40 in group 1, 2, 3 and 4* respectively | HR 1.1(1.0-1.21) per each 5-mmHg increment                                                                 |
| Wang et al, 2010(17) | RVSP > 30 mm Hg                                                     | 93 patients with HF undergoing cardiac resynchronization stratified into Group 1: (RVSP>50mm H, n=29); Group 2: (30<RVSP≤50 mmHg, n=17) and Group 3: (RVSP≤30mm Hg, n=47)                             | 32 (6-60) | 59.6 81.7% | All cause mortality, HF mortality              | NR | NR   | 49.5 | NR | 28 vs 6 vs 17% in group1,2, and 3 respectively | NR | NR | NR                                                             | Non-significant increased in all cause mortality (p=0.33), increase in HF mortality but OR/HR not reported |

|    |                                                     |                                                         |                                                                                                                                                                    |    |                                                                   |                                                                                  |    |                                                     |                                                     |    |                                  |                               |                                |                                       |                                                                 |
|----|-----------------------------------------------------|---------------------------------------------------------|--------------------------------------------------------------------------------------------------------------------------------------------------------------------|----|-------------------------------------------------------------------|----------------------------------------------------------------------------------|----|-----------------------------------------------------|-----------------------------------------------------|----|----------------------------------|-------------------------------|--------------------------------|---------------------------------------|-----------------------------------------------------------------|
| 1  |                                                     |                                                         |                                                                                                                                                                    |    |                                                                   |                                                                                  |    |                                                     |                                                     |    |                                  |                               |                                |                                       |                                                                 |
| 2  |                                                     |                                                         |                                                                                                                                                                    |    |                                                                   |                                                                                  |    |                                                     |                                                     |    |                                  |                               |                                |                                       |                                                                 |
| 3  | Ghio et al, 2013(43)                                | RVSP>40 mm Hg and RV dysfunction defined as TAPSE<14 mm | 658 patients with chronic HF stratified into group 1( no PH no RVD, n=256), group 2(RVD, no PH, n=54), group 3(PH, no RVD, n=167), and group 4(RVD and PH, n=67)   | 38 | 63 86%                                                            | All cause mortality, urgent cardiac transplantati on or ventricular fibrillation | 83 | 38                                                  | 35.6                                                | NR | 4.5% in PH vs 17.4% in non PH    | 8.7% in PH vs 21.4% in non PH | 20.3% in PH vs 42.3% in non PH | 45.2% in PH vs 59.4% in non PH        | HR 1.90 (2.18–3.06) for group3 and 4.27 (3.45–7.43) for group 4 |
| 15 | <b>Studies in patients with heart valve disease</b> |                                                         |                                                                                                                                                                    |    |                                                                   |                                                                                  |    |                                                     |                                                     |    |                                  |                               |                                |                                       |                                                                 |
| 17 | Fawzy et al, 2004(19)                               | Severe PH defined as RVSP> 50 mm Hg                     | 559 patients undergoing MBV stratified into three groups: group A (RVSP <50 mmHg; n = 345); group B (RVSP 50-79 mmHg; n = 183) and group C (RVSP ≥80 mmHg; n = 31) | 63 | 31/28.1% vs 30/25.1% vs 27/16.1% in group A, B and C respectively | Reversibilit y of PH following MBV                                               | NR | 38.5 vs 59 vs 97.8 in group A, B and C respectively | 62% vs 33% vs 5% for group A, B, and C respectively | NR | 0                                | 0                             | 0                              | 0                                     | No mortality was encountered, PH normalized over a 6-12 months  |
| 26 | Naidoo et al, 1991(44)                              | RHC with PASP≥<30 mm Hg                                 | 139 patients with AR (69 undergoing AVS) stratified into group I (normal or mild PH) and group II (moderate PH or marked PH)                                       | 6  | 32.9 vs 36.2 and 69.7 vs 77.8 in group I and II respectively      | Immediate and 6 months post-operative mortality                                  | NA | 18 vs 43.7 in group I and II respectively           | 63.3                                                | NR | 3 in group I vs 2.8% in group II | NR                            | NR                             | NR                                    | No increased in mortality, HR not reported                      |
| 33 | Manners et al, 1977(49)                             | RHC with PASP > 70 mm Hg                                | 392 patients who had undergone prosthetic valve surgery stratified into 2 PASP<70 mm Hg, n=336 or PASP>70 mm Hg, n=56)                                             | 48 | NR                                                                | Hospital mortality                                                               | NA | Mean PASP was 93 mm Hg                              | NR                                                  | NR | NR                               | NR                            | NR                             | 5.4% at 4 years in both PH and non PH | NR                                                              |

|                             |                 |                                                                                                                                                      |          |                                                             |                                                          |    |                |                        |                                                         |                      |                                                                                    |                                           |                              |                                                                                      |                                                                        |
|-----------------------------|-----------------|------------------------------------------------------------------------------------------------------------------------------------------------------|----------|-------------------------------------------------------------|----------------------------------------------------------|----|----------------|------------------------|---------------------------------------------------------|----------------------|------------------------------------------------------------------------------------|-------------------------------------------|------------------------------|--------------------------------------------------------------------------------------|------------------------------------------------------------------------|
| Roseli et al, 2002(45)      | RVSP>35 mm Hg   | 2385 patients undergoing AVR stratified into 3 groups: RVSP < 35 mm Hg n= 611; RVSP 35 -50 mm Hg, n= 1199; RVSP>50 mm Hg, n= 575                     | 51<br>.6 | 74<br>55%                                                   | All cause hospital and late mortality                    | NR | 41             | 74                     | NR                                                      | 15.8 vs 19.7 vs 25.9 | NR                                                                                 | NR                                        | NR                           | NR                                                                                   | Higher RVSP was predictor of 5 and 10 years mortality, HR not reported |
| Melby et al, 2011(46)       | RVSP>35 mm Hg   | 1080 patients with AS undergoing AVR, stratified into NPH, (RVSP<35 mm Hg, n=574) and PH group ( mild PH, moderate and severe PH)                    | 48       | 72.3 vs 70.2 vs 59.1 vs 57.8% in PH and non PH respectively | All cause operative and long term mortality              | NR | 51 in PH group | 46.8                   | NR                                                      | NR                   | 17.1 vs 17.6 vs 17.1 vs 23.5 for non PH, mild, moderate and severe PH respectively | 25.7 vs 24 vs 23.2 vs 32.3                | 25.7 vs 38.4 vs 52.7 vs 46.1 | OR 1.51 (1.16-1.96), persistent PH after AVR was associated with Decreased survival. |                                                                        |
| Le Tourneau et al, 2010(47) | RVSP≥50 mm Hg   | 256 patients with MR undergoing MVO, stratified into group 1 (RVSP<50 mm Hg, n=174) and group 2 ( RVSP≥50 mm Hg, n=82)                               | 49<br>.2 | 63<br>66%                                                   | All cause mortality Cardiovascular deaths                | NR | 45±14          | 32% had RVSP≥ 50 mm Hg | NR                                                      | NR                   | NR                                                                                 | 31.6 vs 31.7 in group1 and 2 respectively | NR                           | HR 1.43 (1.09-1.88) per 10 mmHg increment of RVSP                                    |                                                                        |
| Parker et al, 2010(7)       | RVSP > 35 mm Hg | 1156 patients with MR or AR stratified into normal (RVSP<30 mm Hg), borderline (31–34 mm Hg), mild (35–40 mm Hg), or moderate or greater (>40 mm Hg) | 87<br>.6 | 72<br>51%                                                   | All cause mortality                                      | 52 | 29             | NR                     | NR                                                      | NR                   | NR                                                                                 | NR                                        | NR                           | HR for moderate or greater PH 1.95(1.58–2.41) in AR and 1.48(1.26–1.75) in MR        |                                                                        |
| Barbieri et al, 2010(11)    | RVSP > 50 mm Hg | 437 patients with MR, 35% NYHA class III or IV, normal LVEF, stratified into NPH (RVSP≤50mm Hg) and PH (RVSP>50 mm Hg)                               | 57<br>.6 | 67<br>66%                                                   | All cause mortality, cardiovascular death, heart failure |    | 45             | 23                     | 1.70 (1.10–2.62) and 1.19 (1.06–1.35) for each 10 mm Hg | NR                   |                                                                                    | NR                                        | 23% at the mean follow up    | HR 2.03 (1.30–3.18) and 1.16 (1.03–1.31) for each 10 mm Hg increase of RVSP          |                                                                        |

|    |                          |                                               |                                                                                                                                                                            |          |           |                                                                                                                                                         |                                                                   |          |                  |                                                        |    |                                                        |                                 | increase of RVSP                                      |                                                                        |
|----|--------------------------|-----------------------------------------------|----------------------------------------------------------------------------------------------------------------------------------------------------------------------------|----------|-----------|---------------------------------------------------------------------------------------------------------------------------------------------------------|-------------------------------------------------------------------|----------|------------------|--------------------------------------------------------|----|--------------------------------------------------------|---------------------------------|-------------------------------------------------------|------------------------------------------------------------------------|
| 7  | Kainuma et al, 2011(48)  | Echocardiography, PH definition not specified | 46 patients undergoing MVR, NYHA III or IV, LVEF<40%, stratified into group 1 (RVSP < 40 mm Hg, n=19), group 2 (moderate PH (40<RVSP<60, n=17) and group 3 (RVSP>60, n=10) | 36       | 64<br>35% | Cardiac death, myocardial infarction, endocarditis, thromboembolism, reoperation for recurrent MR, readmission for heart failure, and fatal arrhythmia. | NR                                                                | 47       | NR               | 30% in the severe PH but not significant, OR and CI NR | NR | 15.8 vs 11.8 vs 20% for group 1, 2, and 3 respectively | 31.6 vs 29.4 vs 30%             | 47.4 vs 82.4 vs 50%                                   | HR for all adverse cardiac events 6.9 (1.1-44) in group3               |
| 21 | Khandhar et al, 2009(51) | Severe PH defined as RVSP>60 mm Hg            | 506 patients with severe AR stratified into group 1, severe PH with RVSP>60 mm Hg, n= 83 and group 2 (RVSP<60, n=423), NYHA NR                                             | N<br>R   | 63<br>47% | All cause mortality                                                                                                                                     | 100                                                               | NR       | 16% of severe PH | NR                                                     | NR | NR                                                     | 21.6 of patients with severe PH | NR                                                    | PH was associated with increased mortality in all groups, OR and CI NR |
| 28 | Malouf et al, 2002(50)   | Severe PH defined as peak TRV≥4 m/s           | 3171 patients with AS of whom 47 with severe PH, stratified into group 1 (no AVR, n = 10) and group 2 (AVR, n= 37), 79% in NYHA III and IV                                 | 15<br>.3 | 78<br>47% | All cause mortality                                                                                                                                     | 63% of the 3171 total population of patients with aortic stenosis | 4.16 m/s | NA               | NR                                                     | NR | NR                                                     | NR                              | 80% vs. 32% in group1 and 2 respectively at median FU | OR for mortality risk in severe PH and AVS 1.76 (0.81-3.35)            |

|                          |                                                                   |                                                                                                                                                  |      |                                                                |                                                          |    |                                                      |      |    |    |                                             |                                           |                                                                    |                                                                                |
|--------------------------|-------------------------------------------------------------------|--------------------------------------------------------------------------------------------------------------------------------------------------|------|----------------------------------------------------------------|----------------------------------------------------------|----|------------------------------------------------------|------|----|----|---------------------------------------------|-------------------------------------------|--------------------------------------------------------------------|--------------------------------------------------------------------------------|
| Zuern et al, 2012(52)    | RVSP > 30 mm Hg                                                   | 200 patients with AS undergoing AVR stratified into NPH (RVSP < 30) vs mild-to-moderate PH (30<RVSP<60) and severe PH (>60 mm Hg)                | 31.2 | 72.3 vs 52.5%                                                  | All cause mortality                                      | NR | 36.3                                                 | 61   | NR | NR | 10.2 vs 14.1 vs 30.4                        | 30.7 vs 40.4 vs 60.1                      | 2.6, 15.2 and 26.1%                                                | HR for mild to moderate PH 4.9 (1.1-21.8) and severe PH 3.3( 0.6-19.7)         |
| Ben-Dor et al, 2011(21)  | RVSP > 40 mm Hg                                                   | 509 patients with AS divided into group 1 ( RVSP < 40 mm Hg, n= 161); group 2 (RVSP 40-59, n=175) and group 3 (RVSP > 60 mm Hg, n= 173)          | 6.73 | 82.3 vs 82.4 vs 80.5 in group1, 2, and 3 respectively, > 75%   | All cause mortality                                      | NR | 33.7 vs 49.3 vs 70.7 in group1, 2, and3 respectively | 68.3 | NR | NR | NR                                          | NR                                        | 21.7 vs 39.3 vs 49.1 in group1, 2, and3 respectively at median FU* | PH was significantly associated with increase in mortality, OR/HR not reported |
| Yang et al, 2012(53)     | RVSP>40 mm Hg                                                     | 845 patients who underwent valve surgery and/or CABG (444 without PH or NPH vs 401 PH), all with LVEF < 40%                                      | 39   | 65.2 vs 67.8 vs 78.8 vs 72.6% in NPH and PH group respectively | Post operative complications and mortality               | NR | NR                                                   | NR   | NR | NR | 4.6 vs 13.9 in NPH vs PH group respectively | NR                                        | 16.7 vs 30.6* in NPH vs PH group respectively                      | OR for mild/moderate PH 1.475 (1.119-1.943)                                    |
| Nozohoor et al, 2012(54) | RVSP> 50 mm Hg                                                    | 270 patients with MR undergoing MVS, stratified into NPH group (RVSP<50 mm Hg) and PH group (RVSP≥50 mm Hg)                                      | 61.2 | 61.5 vs 66.5 vs 70 vs 54% in no PH and PH group respectively   | Perioperative complications and all cause late mortality | NR | NR                                                   | 27   | NR | NR | 7.6 vs 8.2 in no PH and PH respectively     | 22.4 vs 17.6 in no PH and PH respectively | 31.1 in both groups                                                | HR 4.3(1.1–17.4) during the initial 3 years after MVS                          |
| Ward and Ward, 1975(18)  | RHC with extreme PH defined as SPAP>80 mm Hg and PVR >10 Wu: 8.2% | Mitral valve disease (n = 586), 48 extreme PH stratified into group 1 (no operation), group 2 (all surgical) and group 3 (survive after surgery) | 69.6 | 46.2 vs 42.4 vs 43vs29% in group 1 and 2 respectively          | All-cause mortality                                      | NA | 105 vs 96.6                                          | 8.2  | NA | NR | NR                                          | NR                                        | NR                                                                 | Extreme PH was associated with higher mortality, and surgery improved survival |

|   |                           |                                             |                                                                                                                                                                   |          |                                                   |                                              |    |                                             |                   |    |    |                                    |                                      |                                      |                                                                                |
|---|---------------------------|---------------------------------------------|-------------------------------------------------------------------------------------------------------------------------------------------------------------------|----------|---------------------------------------------------|----------------------------------------------|----|---------------------------------------------|-------------------|----|----|------------------------------------|--------------------------------------|--------------------------------------|--------------------------------------------------------------------------------|
| 1 |                           |                                             |                                                                                                                                                                   |          |                                                   |                                              |    |                                             |                   |    |    |                                    |                                      |                                      |                                                                                |
| 2 |                           |                                             |                                                                                                                                                                   |          |                                                   |                                              |    |                                             |                   |    |    |                                    |                                      |                                      |                                                                                |
| 3 | Ghoreishi et al, 2012(55) | RVSP>40 mm Hg                               | 873 patients with MR who underwent MVS, stratified into NPH and PH group (mild, moderate, severe) NHYA not reported                                               | 35       | 59<br>59%                                         | Hospital mortality, Late all cause mortality | NR | 46 (echo), and sPAP was 43 by RHC           | 53                | NR | NR | 16.2 in non PH vs 32% in PH group* | 33.9 in non PH vs 48.1% in PH group* | 51.8 in non PH vs 60.9% in PH group* | HR 1.018(1.007-1.028) per each 1 mm Hg increment in RVSP                       |
| 4 |                           |                                             |                                                                                                                                                                   |          |                                                   |                                              |    |                                             |                   |    |    |                                    |                                      |                                      |                                                                                |
| 5 | Cam A et al, 2011(22)     | RHC with severe PH defined as mPAP>35 mm Hg | 317 patients with AS, 35 with severe PH underwent surgery and were compared to 114 mild moderate PH and to 46 severe PH treated conservatively, NHYA not reported | 11<br>.3 | 71/53.5 (mild-moderate PH) vs 75/51.4 (severe PH) | All cause mortality                          | NA | 22.5 (mild-moderate PH) vs 45.3 (severe PH) | 47.0              | NR | NR | NR                                 | NR                                   | 74.5 vs 75.5                         | HR 1.008 (0.9-1.11) and early post-operative reduction in mPAP 0.93 (1.2-12.5) |
| 6 |                           |                                             |                                                                                                                                                                   |          |                                                   |                                              |    |                                             |                   |    |    |                                    |                                      |                                      |                                                                                |
| 7 | Pai et al, 2007(56)       | Severe PH defined as RVSP>60 mm Hg          | 116 patients (of 740 severe AS) with severe PH among which 36 underwent AVR and were compare to 83 remaining                                                      | 18       | 75<br>39%                                         | All cause mortality                          | NR | 69 (severe PH)                              | 15.7% (severe PH) | NR | NR | NR                                 | 30.5 (PH) vs 15.5(NP H)              | NR                                   | AVR benefit HR 0.28 (0.16-0.51) independent of PH.                             |
| 8 |                           |                                             |                                                                                                                                                                   |          |                                                   |                                              |    |                                             |                   |    |    |                                    |                                      |                                      |                                                                                |

AS(R): Aortic stenosis(regurgitation); AVS(R): Aortic valve surgery(replacement); CABG: Coronary artery bypass graft; eSPAP: Estimated systolic pulmonary artery pressure; HFpEF: Heart failure (HF) and preserved ejection fraction; LVEF: Left ventricular (LV) ejection fraction; MBV: Mitral Balloon Valvotomy; mPAP: mean pulmonary arterial pressure; mPCWP: mean pulmonary capillary wedge pressure; MV(R/O): Mitral valve (Repair/Operation); NPH: Non pulmonary hypertension; PH: Pulmonary hypertension; PVR: Pulmonary vascular resistance; RV(SP/TG): Right ventricular systolic pressure/tricuspid gradient); TPG: Transpulmonary gradient; TRV: Tricuspid regurgitation(TR) velocity(TRV); UTSW: University of Texas—Southwestern; WU: Wood units; P<0.05

\*\*

**Table 3: Other prognostic factors associated with mortality in patients with pulmonary hypertension associated with left heart disease**

| Factor                                                           | Number of studies reporting | Number of studies in which the factor was associated with poor outcome |
|------------------------------------------------------------------|-----------------------------|------------------------------------------------------------------------|
| Age                                                              | 14                          | 14                                                                     |
| Sex (male vs female)                                             | 11                          | 3                                                                      |
| Racial / ethnic group                                            | 2                           | 0                                                                      |
| HF episodes                                                      | 5                           | 2                                                                      |
| Prior hypertension                                               | 5                           | 1                                                                      |
| History of diabetes                                              | 8                           | 3                                                                      |
| Smoking                                                          | 3                           | 0                                                                      |
| History of cardiovascular disease                                | 1                           | 1                                                                      |
| Functional class (NYHA/WHO)                                      | 12                          | 7                                                                      |
| Killip class for MI                                              | 2                           | 2                                                                      |
| Heart rate                                                       | 2                           | 0                                                                      |
| Systolic BP                                                      | 4                           | 2                                                                      |
| Diastolic BP                                                     | 1                           | 1                                                                      |
| Mean BP                                                          | 1                           | 1                                                                      |
| SPO2                                                             | 3                           | 1                                                                      |
| Hypotension                                                      | 1                           | 1                                                                      |
| Atrial fibrillation                                              | 5                           | 2                                                                      |
| Ischemic etiology of HF                                          | 4                           | 0                                                                      |
| Urea                                                             | 2                           | 1                                                                      |
| Kidney disease (by creatinine, GFR, or hemodialysis)             | 17                          | 6                                                                      |
| BNP                                                              | 3                           | 1                                                                      |
| Hemoglobin                                                       | 2                           | 0                                                                      |
| LVEF                                                             | 10                          | 6                                                                      |
| LV end diastolic diameter /index                                 | 6                           | 3                                                                      |
| Atrial diameter                                                  | 1                           | 1                                                                      |
| Deceleration time                                                | 1                           | 1                                                                      |
| RV function (by TAPSE or other means)                            | 3                           | 3                                                                      |
| Use of medications (ACEI and or beta blockers or spironolactone) | 6                           | 3                                                                      |
| Functional mitral regurgitation                                  | 5                           | 4                                                                      |
| RVSP $\geq$ 50 or > 60 mm Hg                                     | 9                           | 7                                                                      |
| Presence of COPD                                                 | 4                           | 3                                                                      |
| End diastolic pulmonary regurgitation                            | 1                           | 1                                                                      |

ACEI: Angiotensin converting enzyme inhibitors; BNP: Brain natriuretic peptide; BP: Blood pressure; COPD: Chronic obstructive pulmonary disease; GFR: Glomerular filtration rate; HF: Heart failure; MI: Myocardial infarction; NYHA: New York Heart Association; RVSP: Right ventricular systolic pressure; RV: Right ventricle; TAPSE: Tricuspid annular plan systolic excursion; WHO: World Heart Organization.



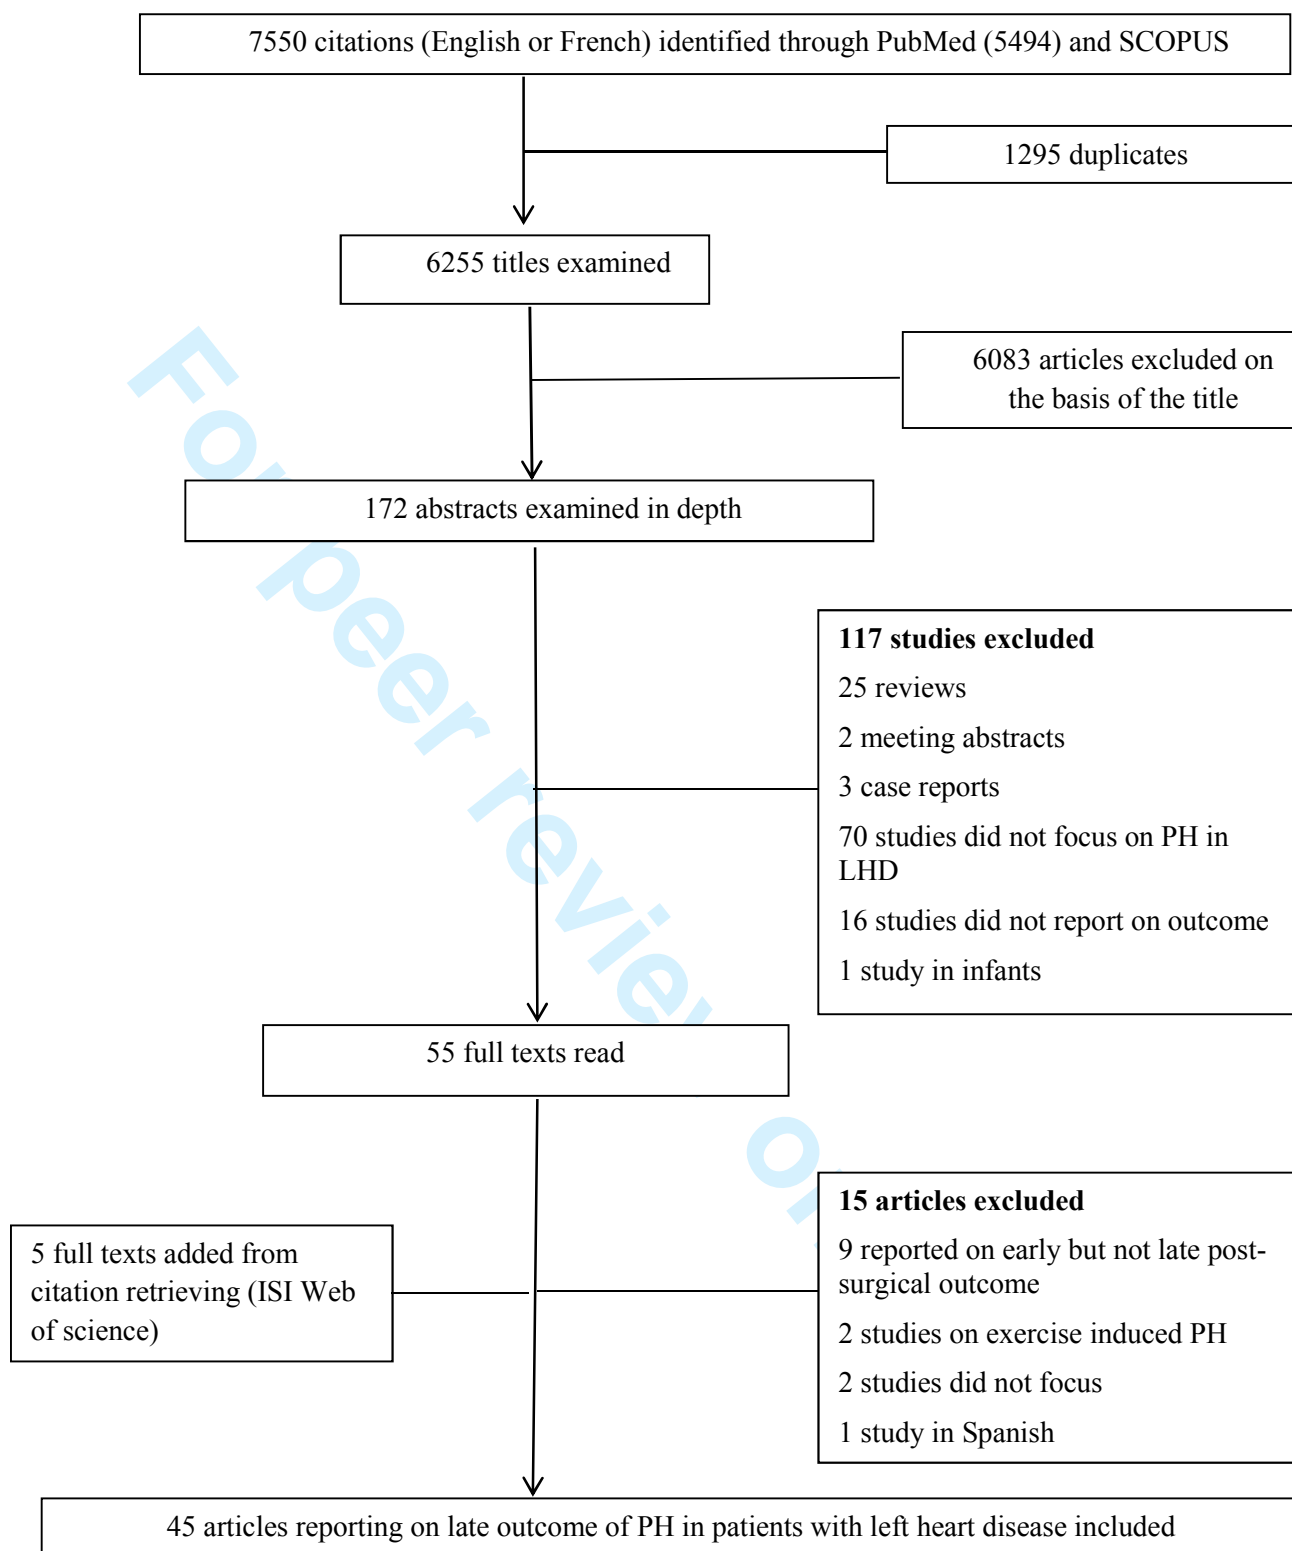

**Figure 1: Flow diagram of literature search process**

1  
2  
3  
4  
5  
6  
7  
8  
9  
10  
11  
12  
13  
14  
15  
16  
17  
18  
19  
20  
21  
22  
23  
24  
25  
26  
27  
28  
29  
30  
31  
32  
33  
34  
35  
36  
37  
38  
39  
40  
41  
42  
43  
44  
45  
46  
47  
48  
49  
50  
51  
52  
53  
54  
55  
56  
57  
58  
59  
60

- Online section -

**Predictors of hospitalizations for heart failure and mortality in patients with pulmonary hypertension associated with left heart disease: A systematic review**

For peer review only

**Online box 1: Search terms used in the builder*****For pubmed:***

((((pulmonary hypertension) OR pulmonary pressure)) AND (((heart failure) OR left heart disease) OR valvular heart disease)) AND ((((((predict) OR outcome) OR risk) OR prognosis) OR discrimination) OR c statistic)

***For Scopus:***

((((pulmonary hypertension) OR pulmonary pressure)) AND (((heart failure) OR left heart disease) OR valvular heart disease)) AND ((((((predict) OR outcome) OR risk) OR prognosis) OR discrimination) OR c statistic) AND (LIMIT-TO(SUBJAREA, "MEDI")) AND (LIMIT-TO(EXACTKEYWORD, "Heart failure") OR LIMIT-TO(EXACTKEYWORD, "Mortality") OR LIMIT-TO(EXACTKEYWORD, "Prognosis") OR LIMIT-TO(EXACTKEYWORD, "Echocardiography") OR LIMIT-TO(EXACTKEYWORD, "Risk Factors") OR LIMIT-TO(EXACTKEYWORD, "Heart Failure") OR LIMIT-TO(EXACTKEYWORD, "Pulmonary hypertension") OR LIMIT-TO(EXACTKEYWORD, "Treatment Outcome") OR LIMIT-TO(EXACTKEYWORD, "Follow up")) AND (LIMIT-TO(SUBJAREA, "MEDI")) AND (LIMIT-TO(LANGUAGE, "English") OR LIMIT-TO(LANGUAGE, "French"))

**Online table 1: Scoring algorithm developed by de Jonge et al<sup>6</sup> to strengthen the discriminative capacity of the QUIPS\***

| Criteria**                                         | Score |     |   |
|----------------------------------------------------|-------|-----|---|
|                                                    | +     | +/- | - |
| 1. Study participation                             |       |     |   |
| • Target population                                | 3     | 1.5 | 0 |
| • Sampling frame                                   | 3     | 1.5 | 0 |
| • Inclusion criteria                               | 3     | 1.5 | 0 |
| • Baseline study population                        | 3     | 1.5 | 0 |
| • Adequate study participation                     | 3     | 1.5 | 0 |
| 2. Study attrition                                 |       |     |   |
| • Proportion of population available for analysis  | 5     | 2.5 | 0 |
| • Outcome and prognostic factor information on     | 5     | 2.5 | 0 |
| • Reasons and potential impact of subjects lost to | 5     | 2.5 | 0 |
| 3. Measurement of prognostic factors               |       |     |   |
| • Definition of prognostic factor                  | 5     | 2.5 | 0 |
| • Valid and reliable measurement of prognostic     | 5     | 2.5 | 0 |
| • Method and setting of prognostic factor          | 5     | 2.5 | 0 |
| 4. Measurement of outcomes                         |       |     |   |
| • Definition of outcome                            | 5     | 2.5 | 0 |
| • Valid and reliable measurement of outcome        | 5     | 2.5 | 0 |
| • Method and setting of outcome measurement        | 5     | 2.5 | 0 |
| 5. Statistical analysis and presentation           |       |     |   |
| • Presentation of analytical strategy              | 5     | 2.5 | 0 |
| • Model development strategy                       | 5     | 2.5 | 0 |
| • Reporting of results                             | 5     | 2.5 | 0 |

\* QUIPS: Quality In Prognosis Studies

\*\* Used (adapted) QUIPS list for scoring methodological quality of prognosis studies

All five domains were given a maximum of 15 points each, equally distributed across all items per category. For four items we assigned 5 points in case of low risk of bias and 2.5 and 0 in case of moderate and high risk of bias, respectively, except for category 1 (patient selection bias) containing five instead of three items, for which we assigned 3 points in case of low risk of bias and 1.5 and 0 in case of moderate and high risk of bias, respectively. A total score, with a maximum of 75 points, was calculated by summing up the scores per item. A priori, we chose to consider  $\geq 60$  points ( $\geq 80\%$  of the maximum attainable score) as high quality, between 45 and 60 points ( $\geq 60\%$  of the maximum attainable score) as moderate/high quality and  $< 45$  points as low quality studies.

Online figure 2: Number of studies on outcome of pulmonary hypertension associated with left heart disease identified over time

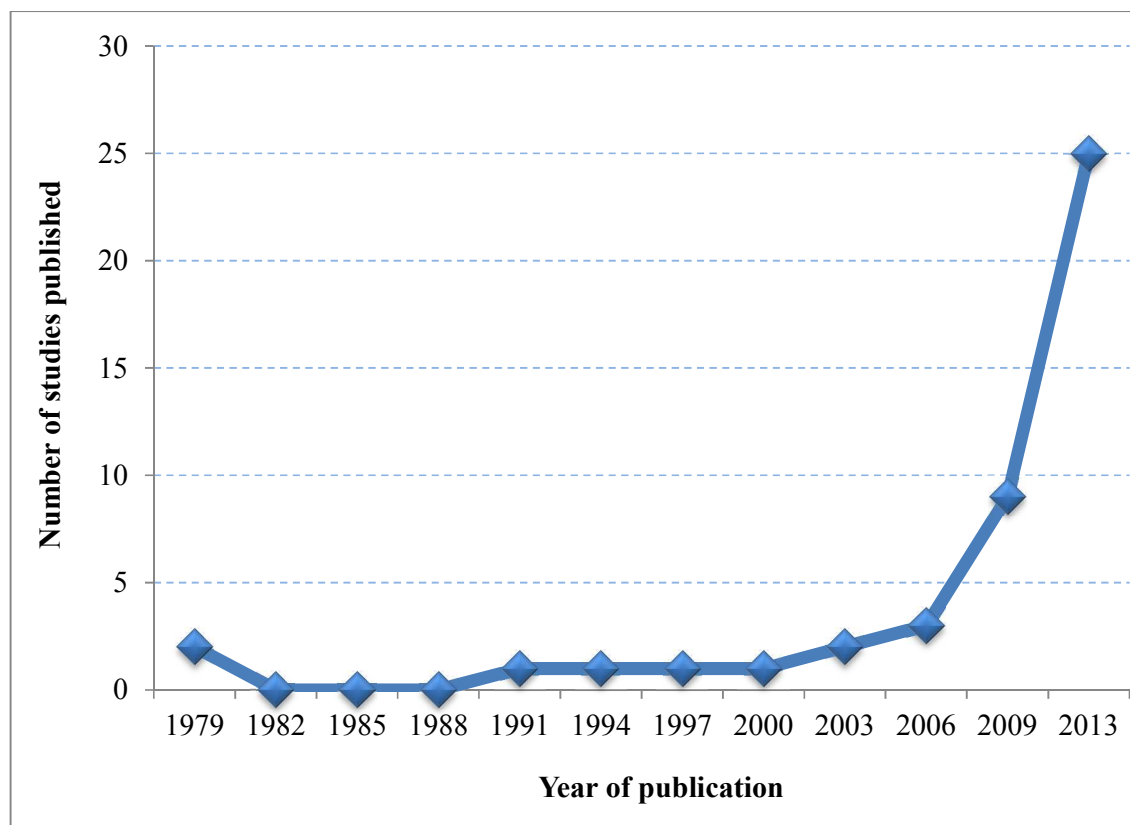

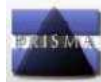

# PRISMA 2009 Checklist

| Section/topic                      | #  | Checklist item                                                                                                                                                                                                                                                                                              | Reported on page # |
|------------------------------------|----|-------------------------------------------------------------------------------------------------------------------------------------------------------------------------------------------------------------------------------------------------------------------------------------------------------------|--------------------|
| <b>TITLE</b>                       |    |                                                                                                                                                                                                                                                                                                             |                    |
| Title                              | 1  | Identify the report as a systematic review, meta-analysis, or both.                                                                                                                                                                                                                                         | 1                  |
| <b>ABSTRACT</b>                    |    |                                                                                                                                                                                                                                                                                                             |                    |
| Structured summary                 | 2  | Provide a structured summary including, as applicable: background; objectives; data sources; study eligibility criteria, participants, and interventions; study appraisal and synthesis methods; results; limitations; conclusions and implications of key findings; systematic review registration number. | 2,3                |
| <b>INTRODUCTION</b>                |    |                                                                                                                                                                                                                                                                                                             |                    |
| Rationale                          | 3  | Describe the rationale for the review in the context of what is already known.                                                                                                                                                                                                                              | 6                  |
| Objectives                         | 4  | Provide an explicit statement of questions being addressed with reference to participants, interventions, comparisons, outcomes, and study design (PICOS).                                                                                                                                                  | 6,7                |
| <b>METHODS</b>                     |    |                                                                                                                                                                                                                                                                                                             |                    |
| Protocol and registration          | 5  | Indicate if a review protocol exists, if and where it can be accessed (e.g., Web address), and, if available, provide registration information including registration number.                                                                                                                               | NA                 |
| Eligibility criteria               | 6  | Specify study characteristics (e.g., PICOS, length of follow-up) and report characteristics (e.g., years considered, language, publication status) used as criteria for eligibility, giving rationale.                                                                                                      | 7                  |
| Information sources                | 7  | Describe all information sources (e.g., databases with dates of coverage, contact with study authors to identify additional studies) in the search and date last searched.                                                                                                                                  | 8                  |
| Search                             | 8  | Present full electronic search strategy for at least one database, including any limits used, such that it could be repeated.                                                                                                                                                                               | 7, 40              |
| Study selection                    | 9  | State the process for selecting studies (i.e., screening, eligibility, included in systematic review, and, if applicable, included in the meta-analysis).                                                                                                                                                   | 7                  |
| Data collection process            | 10 | Describe method of data extraction from reports (e.g., piloted forms, independently, in duplicate) and any processes for obtaining and confirming data from investigators.                                                                                                                                  | 7,8                |
| Data items                         | 11 | List and define all variables for which data were sought (e.g., PICOS, funding sources) and any assumptions and simplifications made.                                                                                                                                                                       | 7                  |
| Risk of bias in individual studies | 12 | Describe methods used for assessing risk of bias of individual studies (including specification of whether this was done at the study or outcome level), and how this information is to be used in any data synthesis.                                                                                      | 8                  |
| Summary measures                   | 13 | State the principal summary measures (e.g., risk ratio, difference in means).                                                                                                                                                                                                                               | NA                 |
| Synthesis of results               | 14 | Describe the methods of handling data and combining results of studies, if done, including measures of consistency (e.g., $I^2$ ) for each meta-analysis.                                                                                                                                                   | NA                 |

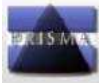

# PRISMA 2009 Checklist

| Section/topic                 | #  | Checklist item                                                                                                                                                                                           | Reported on page # |
|-------------------------------|----|----------------------------------------------------------------------------------------------------------------------------------------------------------------------------------------------------------|--------------------|
| Risk of bias across studies   | 15 | Specify any assessment of risk of bias that may affect the cumulative evidence (e.g., publication bias, selective reporting within studies).                                                             | 8,9                |
| Additional analyses           | 16 | Describe methods of additional analyses (e.g., sensitivity or subgroup analyses, meta-regression), if done, indicating which were pre-specified.                                                         | NA                 |
| <b>RESULTS</b>                |    |                                                                                                                                                                                                          |                    |
| Study selection               | 17 | Give numbers of studies screened, assessed for eligibility, and included in the review, with reasons for exclusions at each stage, ideally with a flow diagram.                                          | 9                  |
| Study characteristics         | 18 | For each study, present characteristics for which data were extracted (e.g., study size, PICOS, follow-up period) and provide the citations.                                                             | 24-38              |
| Risk of bias within studies   | 19 | Present data on risk of bias of each study and, if available, any outcome level assessment (see item 12).                                                                                                | 25,25              |
| Results of individual studies | 20 | For all outcomes considered (benefits or harms), present, for each study: (a) simple summary data for each intervention group (b) effect estimates and confidence intervals, ideally with a forest plot. | 26-38              |
| Synthesis of results          | 21 | Present results of each meta-analysis done, including confidence intervals and measures of consistency.                                                                                                  | NA                 |
| Risk of bias across studies   | 22 | Present results of any assessment of risk of bias across studies (see Item 15).                                                                                                                          | 24,25              |
| Additional analysis           | 23 | Give results of additional analyses, if done (e.g., sensitivity or subgroup analyses, meta-regression [see Item 16]).                                                                                    | NA                 |
| <b>DISCUSSION</b>             |    |                                                                                                                                                                                                          |                    |
| Summary of evidence           | 24 | Summarize the main findings including the strength of evidence for each main outcome; consider their relevance to key groups (e.g., healthcare providers, users, and policy makers).                     | 11                 |
| Limitations                   | 25 | Discuss limitations at study and outcome level (e.g., risk of bias), and at review-level (e.g., incomplete retrieval of identified research, reporting bias).                                            | 15,16              |
| Conclusions                   | 26 | Provide a general interpretation of the results in the context of other evidence, and implications for future research.                                                                                  | 16                 |
| <b>FUNDING</b>                |    |                                                                                                                                                                                                          |                    |
| Funding                       | 27 | Describe sources of funding for the systematic review and other support (e.g., supply of data); role of funders for the systematic review.                                                               | 17                 |

From: Moher D, Liberati A, Tetzlaff J, Altman DG, The PRISMA Group (2009). Preferred Reporting Items for Systematic Reviews and Meta-Analyses: The PRISMA Statement. PLoS Med 6(6): e1000097. doi:10.1371/journal.pmed1000097

For more information, visit: [www.prisma-statement.org](http://www.prisma-statement.org).

# BMJ Open

## Predictors of hospitalizations for heart failure and mortality in patients with pulmonary hypertension associated with left heart disease: A systematic review

|                                 |                                                                                                                                                                                                                              |
|---------------------------------|------------------------------------------------------------------------------------------------------------------------------------------------------------------------------------------------------------------------------|
| Journal:                        | <i>BMJ Open</i>                                                                                                                                                                                                              |
| Manuscript ID:                  | bmjopen-2014-004843.R1                                                                                                                                                                                                       |
| Article Type:                   | Research                                                                                                                                                                                                                     |
| Date Submitted by the Author:   | 04-Jun-2014                                                                                                                                                                                                                  |
| Complete List of Authors:       | Dzudie, Anastase; Douala General Hospital, Medicine<br>Kengne, Andre; South African Medical Research Council,<br>Thienemann, Friedrich; University of Cape Town, Medicine<br>Sliwa, Karen; University of Cape Town, Medicine |
| <b>Primary Subject Heading</b>: | Cardiovascular medicine                                                                                                                                                                                                      |
| Secondary Subject Heading:      | Cardiovascular medicine                                                                                                                                                                                                      |
| Keywords:                       | Pulmonary hypertension, left heart disease, outcome, mortality, predictors, hospitalization                                                                                                                                  |
|                                 |                                                                                                                                                                                                                              |

SCHOLARONE™  
Manuscripts



1  
2  
3 **Predictors of hospitalizations for heart failure and mortality in patients with pulmonary**  
4 **hypertension associated with left heart disease: A systematic review**  
5  
6  
7

8 **Authors:**

9  
10 Anastase DZUDIE, MD, FESC (1,2), Andre Pascal Kengne, MD, PhD (2,3), Friedrich  
11 Thienemann, MD, PhD (2,4,5) and Karen Sliwa, MD, PhD, FESC, FACC (2,3,6)  
12  
13

14  
15  
16 **Affiliations:**

- 17  
18  
19 (1) Douala General Hospital and Buea Faculty of Health Sciences, Cameroon  
20  
21 (2) Department of Medicine, Faculty of Health Sciences, University of Cape Town, South  
22 Africa  
23  
24 (3) Non-Communicable Diseases Research Unit, South African Medical Research Council,  
25 Cape Town, South Africa  
26  
27 (4) Clinical Infectious Diseases Research Initiative, Institute of Infectious Diseases and  
28 Molecular Medicine, Faculty of Health Sciences, University of Cape Town, Cape Town,  
29 South Africa  
30  
31 (5) Division of Infectious Diseases and HIV Medicine, Department of Medicine, University  
32 of Cape Town, Cape Town, South Africa  
33  
34 (6) Hatter Institute for Cardiovascular Research in Africa, Cape Heart Group, University of  
35 Cape Town, Cape Town, South Africa  
36  
37  
38  
39  
40  
41  
42

43 **Address for Correspondence:**

44  
45 Dr Anastase DZUDIE, MD; FESC. Douala General Hospital; P.O Box 4856, Douala; Cameroon;  
46  
47 Tel: + (237)79617981; Fax: + (237)33370146; E-mail: aitzudie@yahoo.com  
48  
49  
50  
51  
52  
53  
54  
55  
56  
57  
58  
59  
60

**ABSTRACT**

Objectives: Left heart disease (LHD) is the main cause of pulmonary hypertension (PH), but little is known regarding the predictors of adverse outcome of PH associated with LHD (PH-LHD).

We conducted a systematic review to investigate the predictors of hospitalizations for heart failure and mortality in patients with PH-LHD.

Design: Systematic review

Data sources: PubMed MEDLINE and SCOPUS from inception to August 2013 were searched, and citations identified via the ISI Web of science.

Study selection: Studies that reported on hospitalization and/or mortality in patients with PH-LHD were included if the age of participants was greater than 18 years and PH was diagnosed using Doppler echocardiography and/or right heart catheterization. Two reviewers independently selected studies, assessed their quality and extracted relevant data.

Results: In all 45 studies (38 from Europe and USA) were included among which 71.1% were of high quality. Thirty-nine studies were published between 2003 and 2013. The number of participants across studies ranged from 46 to 2385; the proportion of men from 21% to 91%; mean/median age from 63 to 82 years; and prevalence of PH from 7 to 83.3%. PH was consistently associated with increased mortality risk in all forms of LHD, except for aortic valve disease where findings were inconsistent. Six of the nine studies with data available on hospitalizations reported a significant adverse effect of PH on hospitalization risk. Other predictors of adverse outcome were very broad and heterogeneous including right ventricular dysfunction, functional class, left ventricular function and presence of kidney disease.

1  
2  
3 Conclusions: PH is almost invariably associated with increased mortality risk in patients with  
4  
5 LHD. However, effects on hospitalization risk are yet to be fully characterized; while available  
6  
7 evidence on the adverse effects of PH have been derived essentially from Caucasians.  
8  
9

10 Word count - 289  
11

12 **Key words:**  
13

14 Pulmonary hypertension, left heart disease, outcome, mortality, predictors, hospitalization  
15  
16  
17  
18  
19  
20  
21  
22  
23  
24  
25  
26  
27  
28  
29  
30  
31  
32  
33  
34  
35  
36  
37  
38  
39  
40  
41  
42  
43  
44  
45  
46  
47  
48  
49  
50  
51  
52  
53  
54  
55  
56  
57  
58  
59  
60

## ARTICLE SUMMARY

### Article focus

A systematic review to identify and synthesize the evidence on predictors of hospitalizations for heart failure (HF) and mortality in patients with pulmonary hypertension due to left heart disease (PH-LHD)

### Key messages

- PH is an independent predictor of mortality in patients with LHD, but the evidence is more consistent in patients with HF and mitral regurgitation.
- Existing evidence on the outcomes of patients with LHD-PH have been derived essentially from studies in Western and developed countries, and may not apply to populations in other settings
- The hypothesis of targeting PH to improve the outcomes of patients with left heart diseases should be actively investigated.

### Strengths and limitations

- Our search strategy was likely limited by its focus on full report published in English and French, and traceable via PubMed MEDLINE and/or SCOPUS

- Important heterogeneity in the included studies precluded the pooling of data to perform a metaanalysis.
- This is the first systematic review on determinants of hospitalizations and mortality in patients with PH-LHD, which presents the available up-to-date and high quality evidence on the subject matter.

For peer review only

## INTRODUCTION

Pulmonary hypertension (PH) describes a group of disorders resulting from an increase in pulmonary vascular resistance, pulmonary blood flow, pulmonary venous pressure, or a combination of these features<sup>1</sup>. Based on shared pathological, hemodynamic characteristics and therapeutic approaches, five clinical groups of PH have been distinguished<sup>2</sup>, with PH associated with left heart disease (PH-LHD) or PH group 2 credited to be the most frequent form of PH in contemporary clinical settings<sup>3</sup>. Indeed, pulmonary hypertension is common in patients with left heart disease (LHD), where it often reflects the background LHD, but has also been reported to be a marker of disease severity and unfavourable prognosis. Patients with PH-LHD have more severe symptoms, worse tolerance to effort, experience higher hospitalization rates, and are more likely to receive an indication of the need for cardiac transplant<sup>3</sup>, with major implications for the quality of life of patients and healthcare costs. Several studies have reported PH-LHD to be associated with increased mortality, both in patients with systolic dysfunction and those with preserved left ventricular ejection fraction (LVEF)<sup>3-6</sup>. Furthermore, the presence of preoperative PH has been associated with poor outcomes in patients with valve disease undergoing valve replacement<sup>5,7</sup>. However, there are still several gaps in the existing evidence, including the prevalence of PH-LHD and measurement of the true impact of PH on symptoms and outcome of various left heart diseases. Equally, little is known regarding the effect of the severity of PH on hospitalizations, re-hospitalization and death, and their co-factors in patients with LHD. Considering the number of recent advances in the management of pulmonary hypertension, it is likely that a better understanding of the impact of PH-LHD on major outcomes might assist the clinical management of patients with pulmonary hypertension.

We performed a systematic review of the existing literature to determine the predictors of hospitalization and mortality in patients with pulmonary hypertension secondary to left heart

1  
2  
3 diseases including systolic dysfunction, diastolic dysfunction and/or valve disease. Additionally,  
4  
5 we aimed to assess whether the severity of PH affects the risk of the two outcomes.  
6  
7  
8  
9

## 10 **METHODS**

11  
12 We searched MEDLINE via PubMed and SCOPUS from inception to August 2013 for all  
13  
14 published studies on PH-LHD, using a combination of key words described in the Online Box 1.

15  
16 All searches were restricted to studies in humans published in 'English' or 'French' languages. In  
17  
18 addition, we manually searched the reference lists of eligible studies and relevant reviews, and  
19  
20 traced studies that had cited them through the ISI Web of Science for any relevant published and  
21  
22 unpublished data. Two independent reviewers (AD and APK) performed the study selection, data  
23  
24 extraction and quality assessment; and disagreements were resolved by consensus or consulting a  
25  
26 third reviewer (KS).  
27  
28  
29

30  
31 Studies that reported on hospitalization and/or mortality in patients with PH-LHD were included  
32  
33 if the following criteria were met: 1) age of participants greater than 18 years; 2) Right  
34  
35 ventricular systolic pressure (RVSP) measured by transthoracic Doppler echocardiography (DE)  
36  
37 and calculated from the maximum tricuspid regurgitation jet velocity using the modified  
38  
39 Bernoulli equation ( $4v^2$ ) and adding right atrial pressure (RAP). RAP could be a fixed value  
40  
41 from 5 mmHg to 10 mmHg, could have been estimated clinically using the jugular venous  
42  
43 pressure (JVP), or estimated by measuring the inferior vena cava size and change with  
44  
45 spontaneous respiration using echocardiography; and/or 3) mean pulmonary artery pressure  
46  
47 (mPAP) measured by right heart catheterization (RHC) or by Doppler echocardiography. We  
48  
49 excluded narrative reviews and case series. Studies on persistent PH following heart  
50  
51 transplantation were not included because of the complexity of the classification of PH in this  
52  
53 population.  
54  
55  
56  
57  
58  
59  
60

1  
2  
3 The following variables were extracted from each study: publication year; country of origin of  
4 the study, study design, study population's demographics, the mean/median follow-up duration,  
5 the outcome predicted, the proportion of measurable RVSP, the mean/median baseline RVSP or  
6 mPAP, the prevalence of PH, the readmission rate, the mortality rate with odds ratio (OR) or  
7 hazards ratio (HR) for PH where reported, and the predictors of outcome including the tricuspid  
8 annular plan systolic excursion (TAPSE). One study<sup>8</sup> reported the effect of PH in relation with  
9 survival. Effects on mortality were obtained by taking the inverse of the HR for survival.  
10  
11  
12  
13  
14  
15  
16  
17  
18

### 19 **Quality assessment**

20  
21  
22 The methodological quality of the selected studies was assessed using the Quality In Prognosis  
23 Studies (QUIPS) tool, designed for systematic reviews of prognostic studies through an  
24 international expert consensus (Table 1)<sup>9</sup>. The QUIPS contains six domains assessing the  
25 following: (1) bias due to patient selection, (2) attrition, (3) measurement of prognostic factors,  
26 (4) outcome measurement, (5) confounding on statistical analysis and reporting results (6)  
27 confounding on presentation. In prognosis studies designed to predict a specific outcome based  
28 on a combination of several possible prognostic factors, confounding is not an issue. Therefore  
29 the items on confounding were considered irrelevant for our quality assessment. The remaining  
30 17 items of the five categories each were scored to assess the quality of the included studies. For  
31 each study, the five domains were scored separately as high (+), moderate (+/-) or low (-) quality  
32 (i.e. presenting a low, moderate, or high risk of bias, respectively). To strengthen the  
33 discriminative capacity of the QUIPS, we used the scoring algorithm developed by de Jonge et al  
34  
35  
36  
37  
38  
39  
40  
41  
42  
43  
44  
45  
46  
47  
48  
49  
50  
51  
52  
53  
54  
55  
56  
57  
58  
59  
60  
<sup>10</sup>, as explained described in details in the Online Table.

### 53 **Data synthesis**

54  
55 Hospitalizations or re-hospitalizations for heart failure and mortality identified by multivariable  
56 analysis in individual studies are presented (Table 2), including their estimated effect size (e.g.  
57  
58  
59  
60



1  
2  
3 odds or hazard ratio) and 95% confidence interval (CI). Quantitative analysis of results was not  
4  
5 done due to important heterogeneity in study design, study population, PH definition and  
6  
7 measurement, outcome definitions in the studies, and confounding or other type of prognostic  
8  
9 factors. We have therefore presented a narrative summary of the available evidence (Table 2).  
10  
11  
12  
13

## 14 15 **RESULTS**

### 16 17 **Studies selection**

18  
19 Figure 1 presents a flow diagram for the study selection process. Of the 7550 citations identified  
20  
21 through searches, 6255 titles were examined and 6083 were excluded on the basis of the title  
22  
23 scanning. The remaining 172 abstracts were examined and 55 articles were screened by full text  
24  
25 of which 15 were excluded for various reasons (Figure 1). Five studies were identified via  
26  
27 citation search. Therefore, 45 articles were included in the final review among which 86.7% were  
28  
29 published between 2003 and 2013 (Online Figure1).  
30  
31  
32  
33

### 34 35 **Study characteristics and methodological quality**

36  
37 The characteristics and methodological quality of the 45 included studies are described in Table  
38  
39 1. The overall quality score ranged from 29.5 to 72.5 points with a median of 63.5. Based on the  
40  
41 cutoffs of  $\geq 60$  and  $\geq 45$  points, respectively, we classified 34 articles as being of high quality, 7 as  
42  
43 moderate-to-high quality and four as low quality studies (Table 1). Studies of high quality were  
44  
45 recent and scored well on patient selection, outcome measurement, statistical analysis and  
46  
47 presentation. Studies classified as moderate/low quality scored relatively well on patient  
48  
49 selection, but poorly on study attrition, statistical analysis and presentation. Twenty four (53.3%)  
50  
51 studies were from USA, twelve (26.6%) from Europe (four from UK, three from Italy, and one  
52  
53 from Spain, Germany, Denmark, France, Sweden), six (13.3%) from Asia (two from Japan, one  
54  
55 from India, China, Korea and Australia) and one from South Africa. One study was multicentric  
56  
57  
58  
59  
60

1  
2  
3 across Europe and USA <sup>11</sup> and another one was multicentric across USA and Canada <sup>12</sup>. Only  
4 three population based cohorts were reported including two prospective<sup>13 14</sup> and one retrospective  
5 studies <sup>15</sup>. For the remaining 42 hospital-based cohort studies, 20 had a retrospective design. The  
6 number of participants ranged from 46 to 2385 in hospital-based and from 244 to 1049 in  
7 population-based studies. The proportion of men ranged from 21% to 91%, and mean/median age  
8 from 63 to 82 years. Twenty six studies were in patients with heart failure (HF) and  
9 cardiomyopathies (two in heart failure with preserved ejection fraction [HFpEF]) and nineteen in  
10 patients with valve disease.

11  
12  
13  
14  
15  
16  
17  
18  
19  
20  
21  
22 Twelve studies defined PH using right heart catheterization (RHC) and 32 studies using DE. One  
23 study defined PH using both RHC and DE. Studies applied variable definitions of PH using both  
24 RHC [based on mPAP >25 or 30 mm Hg, or on systolic pulmonary artery pressure (sPAP)>50  
25 mm Hg, or sPAP>40 mm Hg, or on pulmonary vascular resistance (PVR)>2.5 wood units (WU)]  
26 and Doppler echocardiography [based on RVSP with cutoffs varying from 35 to 50 mm Hg or  
27 based on a mPAP>25 mm Hg <sup>8</sup>, or on a right ventricular tricuspid gradient (RV TG)>25 mm Hg]  
28  
29  
30  
31  
32  
33  
34  
35  
36  
37  
38  
39  
40  
41  
42  
43  
44  
45  
46  
47  
48  
49  
50  
51  
52  
53  
54  
55  
56  
57  
58  
59  
60  
16. Prevalence of PH in HF ranged from 22 to 83.3% overall, 22 to 83.3% in studies of PH based  
on DE and 23 to 76% in studies of PH based on RHC.

## **Outcome of pulmonary hypertension**

### **Admissions for heart failure**

The duration of follow-up ranged from six to 87.6 months overall, 6 to 69.6 months in studies of  
PH based of RHC definition, and 6 to 87.6 months in studies of PH based on DE definition.  
Readmission rates, when reported ranged from 9.2 to 75% overall, 9.2 to 75% in studies of PH  
based on DE definition. Only one study with PH definition based on RHC reported a readmission  
rate of 27%. (Table 2). Admissions or readmissions for HF was reported in 9 studies all based on

1  
2  
3 DE definition among which 7 reported hazard ratios or odd ratios for admission/readmission in  
4 relation with PH. Effect estimates for 6 out of the 7 studies were statistically significant.  
5  
6

### 7 8 **Mortality**

9  
10 Mortality was reported in all studies (Table 2); however, not all of them provided multivariable  
11 adjusted effect estimates of mortality risk associated with PH. PH was associated with increased  
12 all-cause mortality in 24 out of 26 studies of HF among which 6 studies of PH based on RHC  
13 definition, while two studies failed to report an association between PH and all-cause mortality at  
14 6 months. Of these two studies, one used PH definition based on RHC, it was a multicentric trial  
15 of HF that reported an effect estimates for mortality risk from PH [HR 0.89(95% CI: 0.66-1.20)]  
16<sup>12</sup>, while the other one<sup>17</sup> didn't. When reported, mortality rates at 12 months ranged from 0 to  
17 32% overall, 0 to 32% in studies of PH based on DE and 2.9 to 18% in studies of PH based on  
18 RHC (Online Figure 3). As summarized in Table 3, over 35 potential predictors of mortality were  
19 tested across studies with variable and often inconsistent effects on the outcome of interest. Age  
20 was associated with mortality in 14 studies (among which 11 studies of PH based on DE), male  
21 gender in 3/11 studies (all based on DE), left ventricular ejection fraction (LVEF) in 6/10 studies,  
22 right ventricular (RV) function in 3/3 studies and renal disease (rising creatinine, decreasing  
23 glomerular filtration rate (GFR) or dialysis) in 6/17 studies(all based on DE), functional class  
24 [New York Heart Association (NYHA) or World Heart Organization (WHO)] in 7/12 studies  
25 (five based on DE) while the six minutes walking distance was tested in only one study but was  
26 not integrated in the multivariable analysis for outcome risk<sup>17</sup>.  
27  
28  
29  
30  
31  
32  
33  
34  
35  
36  
37  
38  
39  
40  
41  
42  
43  
44  
45  
46  
47  
48  
49  
50  
51  
52

### 53 **DISCUSSION**

54  
55 An increasing number of studies have assessed the risk of readmission and mortality in patients  
56 with LHD related PH over the last decade, and mostly in North America and Europe. Available  
57  
58  
59  
60

1  
2  
3 studies are mostly consistent on the adverse effect of PH (whether assessed using DE or RHC)  
4  
5 on mortality risk in patients with heart failure as well as those with mitral valve disease, but less  
6  
7 unanimous in those with aortic valve disease. The consistent adverse effect of PH in this  
8  
9 population highlights the importance of early diagnosis of PH to reduce mortality. While  
10  
11 available studies have been overall of acceptable quality, substantial heterogeneity in the study  
12  
13 population, PH definition and measurement, outcome definitions as well as other prognostic  
14  
15 factors limits direct comparisons across studies. Information on readmission for heart failure was  
16  
17 limited and the assessment of other prognostic factors in an integrated multivariable model was  
18  
19 very heterogeneous.  
20  
21  
22  
23

24  
25 ***Mortality in patients with pulmonary hypertension and heart failure with reduced ejection***  
26  
27 ***fraction***  
28

29 While PH was an independent prognostic factor for mortality in fatal-outcome studies, the  
30  
31 prevalence of PH and effects on mortality varied according to LVEF. Differences in the  
32  
33 prevalence of PH could be explained at least in part by population heterogeneity (age, level of  
34  
35 HF, HF centers or community study) and differences in the criteria used to define PH across  
36  
37 studies with a variety of cutoff values. Regardless of the prevalence of PH in HF<sub>rEF</sub>, there seems  
38  
39 to be no significant association between the magnitude of reduction in LVEF, the presence or  
40  
41 absence of PH and the effects of PH on mortality risk. It is possible that the small size of studies  
42  
43 and the short duration of follow-up precluded the accumulation of substantial number of events to  
44  
45 allow the detection of a relationship if any. Furthermore, although the precise hemodynamic  
46  
47 threshold beyond which RVSP is invariably associated with mortality is subject to debate; the  
48  
49 risk of death associated with PH seems to increase with higher RVSP (9, 14). A possible  
50  
51 pathophysiologic explanation is that early and higher vascular remodeling occurs in patients with  
52  
53 HF and severe PH, causing a reactive or “post capillary PH with a pre-capillary component”,  
54  
55  
56  
57  
58  
59  
60

1  
2  
3 which in turn has a greater impact on the RV function. Equally, RV systolic function has been  
4  
5 shown to be highly influenced by pressure overload and by vascular resistance in the pulmonary  
6  
7 region (52); and RV function assessed using right heart catheterization or echocardiography has  
8  
9 been shown to be associated with mortality (20, 32, 33). It is however remarkable that one study  
10  
11 (32) reported no interaction between PH and RV function, with both variables being  
12  
13 independently associated with mortality. This highlights the fact that RV function in HF does not  
14  
15 only depend on pulmonary pressure but may also reflect intrinsic myocardial disease. As  
16  
17 suggested by Vachierey et al <sup>6</sup>, there might be a spectrum of clinical phenotypes of RV failing in  
18  
19 PH-LHD that might evolve from one to the other, from isolated post-capillary PH with little  
20  
21 effect on the RV to more advanced disease where the failing RV is the key determinant of  
22  
23 outcome.  
24  
25  
26  
27  
28

29 ***Mortality in patients with pulmonary hypertension and heart failure with preserved ejection***  
30 ***fraction***  
31  
32

33  
34 Over the last decades, the increasing prevalence of HFpEF (53) has been paralleled by an  
35  
36 increasing presence of PH in patients with HFpEF (10). When compare to heart failure with  
37  
38 reduced ejection fraction (HFrEF), patients with HFpEF have their subset of risks factors but  
39  
40 finally, PH convey similar morbidity and mortality risk in the two subgroups of patients (10, 15,  
41  
42 19). The current incomplete understanding of HFpEF limits our ability to explain why these  
43  
44 patients develop PH. However, it is estimated that over time left atrium and ventricular filling  
45  
46 pressure from compromised left ventricle and in some, left atrium relaxation and distensibility  
47  
48 can lead to elevated pulmonary venous pressure, triggering vasoconstriction and arterial  
49  
50 remodeling (2). In total, the finding of PH as an independent prognostic factor for mortality in  
51  
52 patients with HF tends to support the suggestion that PH should be considered as a potential  
53  
54 therapeutic target at least in the group patients with HF who exhibit persisting PH after  
55  
56  
57  
58  
59  
60

1  
2  
3 optimization of HF therapy. In this line, targeting both pulmonary vasculature and the heart  
4  
5 would probably be more beneficial.  
6  
7

### 8 ***Mortality in patients with PH related to valvular heart disease***

9  
10 PH due to valvular heart disease (VHD) was not always related to mortality risk (34, 35, 40, 41,  
11  
12 47), which is in contrast with PH in patients with heart failure. A simple explanation of this  
13  
14 difference could be that the prevalence and severity of PH correlates with the severity and type of  
15  
16 VHD. Though mitral stenosis (MS) has been the classical disease associated with PH-LHD and  
17  
18 reactive PH was initially described in these patients <sup>4</sup>, it is however noticeable that PH due to MS  
19  
20 has received little attention over the last decade, probably because of the progressive decline in  
21  
22 RHD in western countries. Interestingly, the two studies included showed that surgery was safe  
23  
24 and improved survival in patients with PH due to MS <sup>18 19</sup>, with PH regressing to normal levels  
25  
26 over 6-12 months after successful Mitral Balloon Valvotomy (MBV) <sup>19</sup>. In mitral regurgitation  
27  
28 (MR), nearly all cohort studies on outcomes of severe PH reported increase mortality (3, 7, 38,  
29  
30 39, 42, 48). The relevance of this finding is that PH can serve both as an indication for  
31  
32 proceeding to surgical or catheter-based interventions, and also as an operative risk factor for  
33  
34 mitral valve interventions <sup>20</sup>. By contrast, PH is not as common in the aortic valve surgical  
35  
36 cohort. Mortality rates in different studies of patients with VHD depends on comorbidities,  
37  
38 exclusion criteria, and definition for PH. Studies that also evaluated changes in PH following  
39  
40 valve surgery showed a decline in pulmonary pressures following surgery <sup>19 21-23</sup>. It is worth  
41  
42 noting that the pathophysiology of the pulmonary vasculature in PH due to VHD is similar to that  
43  
44 in patients with HF (1).  
45  
46  
47  
48  
49  
50  
51

### 52 ***Hospitalizations and other prognostic factors***

53  
54  
55 The paucity of information on the effect of PH-LHD on hospitalizations or re- hospitalizations as  
56  
57 showed in this study highlights the need for more evidence on this outcome. Such information is  
58  
59  
60

1  
2  
3 important to fully characterize and quantify the contribution of PH-LHD to the global burden of  
4 disease, and assess future improvement from treating the underlying LHD and or controlling PH  
5 in patients with LHD.  
6  
7  
8

9  
10 Of the 35 other potential prognostic factors of mortality in patients with PH that were tested in  
11 multivariable models across studies, investigations on echocardiographic parameters suggested  
12 that PH>60 mm Hg was associated with worse mortality in 7 out of 9 studies. Similarly, a greater  
13 degree of MR, deceleration time when reported (28) and RV function were almost constantly  
14 associated with adverse outcome while LVEF was associated with adverse outcome in 6 of 10  
15 studies. In the evolution of LHD, RV dysfunction usually occurs as a turning point. It shall be  
16 noted that PH incorporates information on diastolic function, MR and pulmonary vascular  
17 disease, and this might explain the pivotal role of PH in gauging the prognosis of patients with  
18 HF.  
19  
20  
21  
22  
23  
24  
25  
26  
27  
28  
29  
30

### 31 ***Strengths and limitations of the studies included in the review***

32  
33 The first limitation of the studies included in our review is the possibility of study population  
34 bias. The majority of studies originated from Western countries and included predominantly  
35 Caucasians and reported mostly on PH-LHD in a population with high prevalence of ischemic  
36 heart disease. This precludes the generalizability of our findings to developing countries where  
37 etiologies of left heart diseases are less of ischemic origin and are more dominated by systemic  
38 hypertension, dilated cardiomyopathies and RHD in a younger population<sup>24</sup>. Therefore PH-LHD  
39 may have a different prognosis in developing countries. Secondly, studies included in this review  
40 defined PH based either on DE or RHC. RHC remains the gold standard to diagnose and confirm  
41 PH, but performing RHC on all patients with dyspnoea would bear excessive risks and be  
42 impractical in resource-limited settings. DE on the other hand is a widely available, safe, and  
43 relatively cheap for diagnosing PH, although the reproducibility of the approach in some  
44  
45  
46  
47  
48  
49  
50  
51  
52  
53  
54  
55  
56  
57  
58  
59  
60



1  
2  
3 circumstances has been questioned. However, a systematic review on the diagnostic accuracy of  
4  
5 DE in PH by Janda et al<sup>25</sup> has shown that the correlation of pulmonary artery systolic pressure by  
6  
7 DE compared to RHC was good with a pooled correlation coefficient of 0.70 (95% CI 0.67 to  
8  
9 0.73). However, studies to date examining the prognostic impact of PH in LHD have been  
10  
11 performed in heterogeneous populations, using variable definitions of PH based both on RHC and  
12  
13 echocardiography parameters, thus limiting any possibility of pooling. Finally, readmissions were  
14  
15 not frequently reported and multivariable analysis when performed was characterized by a great  
16  
17 heterogeneity in the number and range of candidate predictors included in the models, thus  
18  
19 limiting interpretation and generalizability. Therefore, findings on these other prognostic factors  
20  
21 must be interpreted with caution. For studies that performed only univariate analysis, we cannot  
22  
23 rule out the possibility that the reported factors may not preserve a significant association with  
24  
25 the outcome once adjusted for the effect of other extraneous factors. In spite of these limitations,  
26  
27 the majority of studies included were recent and all reported on the relation of PH-LHD with all-  
28  
29 cause mortality, making the conclusions on this relation appropriate for contemporary Western  
30  
31 populations.  
32  
33  
34  
35  
36  
37

### 38 ***Strengths and limitations of the review***

39  
40 First, by restricting our search strategy to full report articles published in English and French, and  
41  
42 in journals available in the used electronic databases, we cannot rule out the possibility of  
43  
44 language or publication bias. Secondly, we used the QUIPS instrument, designed for prognosis  
45  
46 studies to address common sources of bias. The QUIPS, however, lacks discriminative power,  
47  
48 henceforth we addressed this by using of the scoring algorithm suggested by de Jonge et al (6).  
49  
50 This scoring algorithm can still be subject to criticisms, especially because the cutoff points used  
51  
52 to determine the quality of the studies are quite arbitrary. Thirdly, because of important  
53  
54 heterogeneity in studies included, we were not able to pool data to perform a metaanalysis or to  
55  
56  
57  
58  
59  
60



1  
2  
3 stratify data by clinically important subgroups (such as mild, moderate, or severe PH). However,  
4  
5 to our knowledge, this is the first systematic review on determinants of hospitalizations and  
6  
7 mortality in patients with PH-LHD and the search strategy used allowed us to present in large the  
8  
9 results of more recent and high quality publications on the topic.  
10  
11

## 12 13 14 15 **CONCLUSION**

16  
17 The majority of studies included in this review showed that PH is an independent predictor of  
18  
19 mortality in patients with LHD, with the more consistent evidence being in those with HF and  
20  
21 MR. Information on readmission for heart failure was somehow very limited. The majority of this  
22  
23 information derives from studies in Western and developed countries, and may not apply to  
24  
25 populations in other settings. All together, these findings suggest that the hypothesis of targeting  
26  
27 PH to improve the outcomes of patients with left heart diseases should be actively investigated.  
28  
29  
30  
31  
32  
33  
34  
35  
36  
37  
38  
39  
40  
41  
42  
43  
44  
45  
46  
47  
48  
49  
50  
51  
52  
53  
54  
55  
56  
57  
58  
59  
60

**Authors 'contribution statement**

Conceived and designed the protocol: AD and APK. Performed the literature search, selection and quality assessment of the articles and extraction of data: AD, APK and KS. Interpreted the data: AD, APK, FT and KS. Wrote the first draft of the manuscript: AD. Contributed to the writing of the manuscript: AD, APK, KS and FT. Agree with manuscript results and conclusions: AD, APK, FT and KS. All authors read and approved the final manuscript.

**Declaration of competing interest**

None for all co-authors

**Funding**

This project did not receive any funds

**Data sharing**

No additional data available

## References

1. Fang JC, DeMarco T, Givertz MM, Borlaug BA, Lewis GD, Rame JE, et al. World Health Organization Pulmonary Hypertension group 2: pulmonary hypertension due to left heart disease in the adult--a summary statement from the Pulmonary Hypertension Council of the International Society for Heart and Lung Transplantation. *J Heart Lung Transplant* 2012;31(9):913-33.
2. Simonneau G, Gatzoulis MA, Adatia I, Celermajer D, Denton C, Ghofrani A, et al. Updated clinical classification of pulmonary hypertension. *Journal of the American College of Cardiology* 2013;62(25 Suppl):D34-41.
3. Guazzi M, Borlaug BA. Pulmonary hypertension due to left heart disease. *Circulation* 2012;126(8):975-90.
4. Haddad F, Kudelko K, Mercier O, Vrtovec B, Zamanian RT, de Jesus Perez V. Pulmonary hypertension associated with left heart disease: characteristics, emerging concepts, and treatment strategies. *Prog Cardiovasc Dis* 2011;54(2):154-67.
5. Segers VF, Brutsaert DL, De Keulenaer GW. Pulmonary hypertension and right heart failure in heart failure with preserved left ventricular ejection fraction: pathophysiology and natural history. *Curr Opin Cardiol* 2012;27(3):273-80.
6. Vachieri JL, Adir Y, Barbera JA, Champion H, Coghlan JG, Cottin V, et al. Pulmonary hypertension due to left heart diseases. *J Am Coll Cardiol* 2013;62(25 Suppl):D100-8.
7. Parker MW, Mittleman MA, Waksmonski CA, Sanders G, Riley MF, Douglas PS, et al. Pulmonary hypertension and long-term mortality in aortic and mitral regurgitation. *Am J Med* 2010;123(11):1043-8.
8. Adhyapak SM. Effect of right ventricular function and pulmonary pressures on heart failure prognosis. *Prev Cardiol* 2010;13(2):72-7.
9. Hayden JA, Cote P, Bombardier C. Evaluation of the quality of prognosis studies in systematic reviews. *Ann Intern Med* 2006;144(6):427-37.
10. de Jonge RC, van Furth AM, Wassenaar M, Gemke RJ, Terwee CB. Predicting sequelae and death after bacterial meningitis in childhood: a systematic review of prognostic studies. *BMC Infect Dis* 2010;10:232.
11. Barbieri A, Bursi F, Grigioni F, Tribouilloy C, Avierinos JF, Michelena HI, et al. Prognostic and therapeutic implications of pulmonary hypertension complicating degenerative mitral regurgitation due to flail leaflet: a multicenter long-term international study. *Eur Heart J* 2011;32(6):751-9.
12. Khush KK, Tasissa G, Butler J, McGlothlin D, De Marco T. Effect of pulmonary hypertension on clinical outcomes in advanced heart failure: Analysis of the Evaluation Study of Congestive Heart

- 1  
2  
3 Failure and Pulmonary Artery Catheterization Effectiveness (ESCAPE) database. *American Heart*  
4 *Journal* 2009;157(6):1026-34.
- 5  
6  
7 13. Bursi F, McNallan SM, Redfield MM, Nkomo VT, Lam CSP, Weston SA, et al. Pulmonary Pressures  
8 and Death in Heart Failure A Community Study. *Journal of the American College of Cardiology*  
9 2012;59(3):222-31.
- 10  
11 14. Lam CSP, Roger VL, Rodeheffer RJ, Borlaug BA, Enders FT, Redfield MM. Pulmonary Hypertension  
12 in Heart Failure With Preserved Ejection Fraction: A Community-Based Study. *Journal of the*  
13 *American College of Cardiology* 2009;53(13):1119-26.
- 14  
15 15. Strange G, Playford D, Stewart S, Deague JA, Nelson H, Kent A, et al. Pulmonary hypertension:  
16 prevalence and mortality in the Armadale echocardiography cohort. *Heart* 2012;98(24):1805-11.
- 17  
18 16. Damy T, Goode KM, Kallvikbacka-Bennett A, Lewinter C, Hobkirk J, Nikitin NP, et al. Determinants  
19 and prognostic value of pulmonary arterial pressure in patients with chronic heart failure. *Eur*  
20 *Heart J* 2010;31(18):2280-90.
- 21  
22 17. Wang D, Han Y, Zang H, Yu H, Wang S, Wang Z, et al. Prognostic effects of pulmonary hypertension  
23 in patients undergoing cardiac resynchronization therapy. *Journal of Thoracic Disease*  
24 2010;2(2):71-75.
- 25  
26 18. Ward C, Hancock BW. Extreme pulmonary hypertension caused by mitral valve disease. Natural  
27 history and results of surgery. *Br Heart J* 1975;37(1):74-8.
- 28  
29 19. Fawzy ME, Hassan W, Stefadouros M, Moursi M, El Shaer F, Chaudhary MA. Prevalence and fate of  
30 severe pulmonary hypertension in 559 consecutive patients with severe rheumatic mitral stenosis  
31 undergoing mitral balloon valvotomy. *J Heart Valve Dis* 2004;13(6):942-7; discussion 47-8.
- 32  
33 20. Vahanian A, Alfieri O, Andreotti F, Antunes MJ, Baron-Esquivias G, Baumgartner H, et al.  
34 [Guidelines on the management of valvular heart disease (version 2012). The Joint Task Force on  
35 the Management of Valvular Heart Disease of the European Society of Cardiology (ESC) and the  
36 European Association for Cardio-Thoracic Surgery (EACTS)]. *G Ital Cardiol (Rome)*  
37 2013;14(3):167-214.
- 38  
39 21. Ben-Dor I, Goldstein SA, Pichard AD, Satler LF, Maluenda G, Li Y, et al. Clinical profile, prognostic  
40 implication, and response to treatment of pulmonary hypertension in patients with severe aortic  
41 stenosis. *Am J Cardiol* 2011;107(7):1046-51.
- 42  
43 22. Cam A, Goel SS, Agarwal S, Menon V, Svensson LG, Tuzcu EM, et al. Prognostic implications of  
44 pulmonary hypertension in patients with severe aortic stenosis. *J Thorac Cardiovasc Surg*  
45 2011;142(4):800-8.
- 46  
47  
48  
49  
50  
51  
52  
53  
54  
55  
56  
57  
58  
59  
60

- 1  
2  
3 23. Goldstone AB, Chikwe J, Pinney SP, Anyanwu AC, Funt SA, Polanco A, et al. Incidence,  
4 epidemiology, and prognosis of residual pulmonary hypertension after mitral valve repair for  
5 degenerative mitral regurgitation. *Am J Cardiol* 2011;107(5):755-60.  
6  
7  
8 24. Damasceno A, Mayosi BM, Sani M, Ogah OS, Mondo C, Ojji D, et al. The causes, treatment, and  
9 outcome of acute heart failure in 1006 Africans from 9 countries. *Arch Intern Med*  
10 2012;172(18):1386-94.  
11  
12 25. Janda S, Shahidi N, Gin K, Swiston J. Diagnostic accuracy of echocardiography for pulmonary  
13 hypertension: a systematic review and meta-analysis. *Heart* 2011;97(8):612-22.  
14  
15 26. Merlos P, Nunez J, Sanchis J, Minana G, Palau P, Bodi V, et al. Echocardiographic estimation of  
16 pulmonary arterial systolic pressure in acute heart failure. Prognostic implications. *Eur J Intern*  
17 *Med* 2013;24(6):562-7.  
18  
19 27. Agarwal R, Shah SJ, Foreman AJ, Glassner C, Bartolome SD, Safdar Z, et al. Risk assessment in  
20 pulmonary hypertension associated with heart failure and preserved ejection fraction. *J Heart*  
21 *Lung Transplant* 2012;31(5):467-77.  
22  
23 28. Agarwal R. Prevalence, determinants and prognosis of pulmonary hypertension among hemodialysis  
24 patients. *Nephrol Dial Transplant* 2012;27(10):3908-14.  
25  
26 29. Aronson D, Eitan A, Dragu R, Burger AJ. Relationship between reactive pulmonary hypertension and  
27 mortality in patients with acute decompensated heart failure. *Circ Heart Fail* 2011;4(5):644-50.  
28  
29 30. Mutlak D, Aronson D, Carasso S, Lessick J, Reisner SA, Agmon Y. Frequency, determinants and  
30 outcome of pulmonary hypertension in patients with aortic valve stenosis. *Am J Med Sci*  
31 2012;343(5):397-401.  
32  
33 31. Tatebe S, Fukumoto Y, Sugimura K, Miyamichi-Yamamoto S, Aoki T, Miura Y, et al. Clinical  
34 significance of reactive post-capillary pulmonary hypertension in patients with left heart disease.  
35 *Circ J* 2012;76(5):1235-44.  
36  
37 32. Stern J, Heist EK, Murray L, Alabiad C, Chung J, Picard MH, et al. Elevated estimated pulmonary  
38 artery systolic pressure is associated with an adverse clinical outcome in patients receiving cardiac  
39 resynchronization therapy. *Pacing Clin Electrophysiol* 2007;30(5):603-7.  
40  
41 33. Lee WT, Peacock AJ, Johnson MK. The role of per cent predicted 6-min walk distance in pulmonary  
42 arterial hypertension. *Eur Respir J* 2010;36(6):1294-301.  
43  
44 34. Moller JE, Hillis GS, Oh JK, Pellikka PA. Prognostic importance of secondary pulmonary  
45 hypertension after acute myocardial infarction. *Am J Cardiol* 2005;96(2):199-203.  
46  
47 35. Cappola TP, Felker GM, Kao WH, Hare JM, Baughman KL, Kasper EK. Pulmonary hypertension and  
48 risk of death in cardiomyopathy: patients with myocarditis are at higher risk. *Circulation*  
49 2002;105(14):1663-8.  
50  
51  
52  
53  
54  
55  
56  
57  
58  
59  
60

- 1  
2  
3 36. Szwejkowski BR, Elder DH, Shearer F, Jack D, Choy AM, Pringle SD, et al. Pulmonary hypertension  
4 predicts all-cause mortality in patients with heart failure: a retrospective cohort study. *Eur J Heart*  
5 *Fail* 2012;14(2):162-7.  
6  
7  
8 37. Abramson SV, Burke JF, Kelly JJ, Jr., Kitchen JG, 3rd, Dougherty MJ, Yih DF, et al. Pulmonary  
9 hypertension predicts mortality and morbidity in patients with dilated cardiomyopathy. *Ann Intern*  
10 *Med* 1992;116(11):888-95.  
11  
12  
13 38. Kjaergaard J, Akkan D, Iversen KK, Kjoller E, Kober L, Torp-Pedersen C, et al. Prognostic  
14 importance of pulmonary hypertension in patients with heart failure. *Am J Cardiol*  
15 2007;99(8):1146-50.  
16  
17  
18 39. Shalaby A, Voigt A, El-Saed A, Saba S. Usefulness of Pulmonary Artery Pressure by  
19 Echocardiography to Predict Outcome in Patients Receiving Cardiac Resynchronization Therapy  
20 Heart Failure. *The American Journal of Cardiology* 2008;101(2):238-41.  
21  
22  
23 40. Ristow B, Ali S, Ren X, Whooley MA, Schiller NB. Elevated pulmonary artery pressure by Doppler  
24 echocardiography predicts hospitalization for heart failure and mortality in ambulatory stable  
25 coronary artery disease: the Heart and Soul Study. *J Am Coll Cardiol* 2007;49(1):43-9.  
26  
27  
28 41. Grigioni F, Potena L, Galie N, Fallani F, Bigliardi M, Coccolo F, et al. Prognostic implications of  
29 serial assessments of pulmonary hypertension in severe chronic heart failure. *J Heart Lung*  
30 *Transplant* 2006;25(10):1241-6.  
31  
32  
33 42. Levine TB, Levine AB, Goldberg D, Narins B, Goldstein S, Lesch M. Impact of medical therapy on  
34 pulmonary hypertension in patients with congestive heart failure awaiting cardiac transplantation.  
35 *Am J Cardiol* 1996;78(4):440-3.  
36  
37  
38 43. Ghio S, Gavazzi A, Campana C, Inserra C, Klersy C, Sebastiani R, et al. Independent and additive  
39 prognostic value of right ventricular systolic function and pulmonary artery pressure in patients  
40 with chronic heart failure. *Journal of the American College of Cardiology* 2001;37(1):183-88.  
41  
42  
43 44. Ghio S, Temporelli PL, Klersy C, Simioniuc A, Girardi B, Scelsi L, et al. Prognostic relevance of a  
44 non-invasive evaluation of right ventricular function and pulmonary artery pressure in patients  
45 with chronic heart failure. *European Journal of Heart Failure* 2013;15(4):408-14.  
46  
47  
48 45. Naidoo DP, Mitha AS, Vythilingum S, Chetty S. Pulmonary hypertension in aortic regurgitation: early  
49 surgical outcome. *Q J Med* 1991;80(291):589-95.  
50  
51  
52 46. Roselli EE, Abdel Azim A, Houghtaling PL, Jaber WA, Blackstone EH. Pulmonary hypertension is  
53 associated with worse early and late outcomes after aortic valve replacement: implications for  
54 transcatheter aortic valve replacement. *J Thorac Cardiovasc Surg* 2012;144(5):1067-74 e2.  
55  
56  
57  
58  
59  
60

- 1  
2  
3 47. Melby SJ, Moon MR, Lindman BR, Bailey MS, Hill LL, Damiano RJ, Jr. Impact of pulmonary  
4 hypertension on outcomes after aortic valve replacement for aortic valve stenosis. *J Thorac*  
5 *Cardiovasc Surg* 2011;141(6):1424-30.  
6  
7  
8 48. Le Tourneau T, Richardson M, Juthier F, Modine T, Fayad G, Polge AS, et al. Echocardiography  
9 predictors and prognostic value of pulmonary artery systolic pressure in chronic organic mitral  
10 regurgitation. *Heart* 2010;96(16):1311-7.  
11  
12 49. Kainuma S, Taniguchi K, Toda K, Funatsu T, Kondoh H, Nishino M, et al. Pulmonary hypertension  
13 predicts adverse cardiac events after restrictive mitral annuloplasty for severe functional mitral  
14 regurgitation. *J Thorac Cardiovasc Surg* 2011;142(4):783-92.  
15  
16 50. Manners JM, Monroe JL, Ross JK. Pulmonary hypertension in mitral valve disease: 56 surgical patients  
17 reviewed. *Thorax* 1977;32(6):691-6.  
18  
19 51. Malouf JF, Enriquez-Sarano M, Pellikka PA, Oh JK, Bailey KR, Chandrasekaran K, et al. Severe  
20 pulmonary hypertension in patients with severe aortic valve stenosis: clinical profile and  
21 prognostic implications. *J Am Coll Cardiol* 2002;40(4):789-95.  
22  
23 52. Khandhar S, Varadarajan P, Turk R, Sampat U, Patel R, Kamath A, et al. Survival benefit of aortic  
24 valve replacement in patients with severe aortic regurgitation and pulmonary hypertension. *Ann*  
25 *Thorac Surg* 2009;88(3):752-6.  
26  
27 53. Zuern CS, Eick C, Rizas K, Stoleriu C, Woernle B, Wildhirt S, et al. Prognostic value of mild-to-  
28 moderate pulmonary hypertension in patients with severe aortic valve stenosis undergoing aortic  
29 valve replacement. *Clin Res Cardiol* 2012;101(2):81-8.  
30  
31 54. Yang C, Li D, Mennett R, Hammond J, Zhang G, Chen D, et al. The impact of pulmonary  
32 hypertension on outcomes of patients with low left ventricular ejection fraction: a propensity  
33 analysis. *J Heart Valve Dis* 2012;21(6):767-73.  
34  
35 55. Nozohoor S, Hyllen S, Meurling C, Wierup P, Sjogren J. Prognostic value of pulmonary hypertension  
36 in patients undergoing surgery for degenerative mitral valve disease with leaflet prolapse. *J Card*  
37 *Surg* 2012;27(6):668-75.  
38  
39 56. Ghoreishi M, Evans CF, DeFilippi CR, Hobbs G, Young CA, Griffith BP, et al. Pulmonary  
40 hypertension adversely affects short- and long-term survival after mitral valve operation for mitral  
41 regurgitation: implications for timing of surgery. *J Thorac Cardiovasc Surg* 2011;142(6):1439-52.  
42  
43 57. Pai RG, Varadarajan P, Kapoor N, Bansal RC. Aortic valve replacement improves survival in severe  
44 aortic stenosis associated with severe pulmonary hypertension. *Ann Thorac Surg* 2007;84(1):80-5.  
45  
46  
47  
48  
49  
50  
51  
52  
53  
54  
55  
56  
57  
58  
59  
60



**Table 1: Results of quality assessment of studies on mortality and readmissions for heart failure in patients with pulmonary hypertension associated with left heart disease**

| Nº  | Study                                 | Country/<br>Ethnicity                            | Design                                    | Statistical<br>methods              | Study<br>participation | Study<br>attrition | Measurement<br>of prognostic<br>factors | Assessment<br>of<br>outcomes | Statistical<br>analysis and<br>presentation | Quality<br>score<br>(points) | Quality:<br>+ = high<br>+/- =<br>moderate<br>- = low |
|-----|---------------------------------------|--------------------------------------------------|-------------------------------------------|-------------------------------------|------------------------|--------------------|-----------------------------------------|------------------------------|---------------------------------------------|------------------------------|------------------------------------------------------|
| 1.  | Merlos et al, 2013 <sup>26</sup>      | Spain                                            | Prospective hospital based cohort         | KM, Cox regression                  | 13.5                   | 15                 | 10                                      | 15                           | 15                                          | 68.5                         | +                                                    |
| 2.  | Agawal et al, 2012 <sup>27</sup>      | USA – ethnicity data in 98 patients (63% whites) | Retrospective hospital based cohort       | KM, Cox regression                  | 13.5                   | 7.5                | 12.5                                    | 15                           | 15                                          | 63.5                         | +                                                    |
| 3.  | Agawal R, 2012 <sup>28</sup>          | USA – 96% blacks                                 | Prospective hospital based cohort         | KM, Cox regression                  | 12                     | 10                 | 10                                      | 15                           | 15                                          | 62                           | +                                                    |
| 4.  | Aronson et al, 2011 <sup>29</sup>     | USA                                              | Prospective hospital based cohort         | Cox regression                      | 15                     | 15                 | 15                                      | 15                           | 12.5                                        | 72.5                         | +                                                    |
| 5.  | Bursi et al, 2012 <sup>13</sup>       | USA - Caucasian and blacks                       | Prospective population based cohort study | KM, Logistic regression             | 15                     | 12.5               | 12.5                                    | 12.5                         | 15                                          | 65                           | +                                                    |
| 6.  | Strange et al, 2012 <sup>15</sup>     | Armadale-Australia                               | Retrospective population based cohort     | KM, Logistic and cox regression     | 15                     | 7.5                | 10                                      | 12.5                         | 12.5                                        | 58.5                         | +/-                                                  |
| 7.  | Mutlak et al, 2012 <sup>30</sup>      | USA                                              | Prospective hospital based cohort         | KM, Logistic and cox regression, KM | 13.5                   | 15                 | 10                                      | 15                           | 15                                          | 69                           | +                                                    |
| 8.  | Tatebe et al, 2012 <sup>31</sup>      | Japan                                            | Prospective hospital based cohort         | KM, Logistic and cox regression     | 15                     | 10                 | 15                                      | 15                           | 15                                          | 72.5                         | +                                                    |
| 9.  | Adhyapak et al, 2010 <sup>8</sup>     | India                                            | Prospective hospital based cohort         | Cox regression                      | 13.5                   | 10                 | 10                                      | 12.5                         | 5                                           | 53.5                         | +/-                                                  |
| 10. | Stern et al, 2007 <sup>32</sup>       | USA                                              | Retrospective hospital based cohort       | KM, Cox regression                  | 13.5                   | 15                 | 12.5                                    | 12.5                         | 12.5                                        | 66                           | +                                                    |
| 11. | Lee et al, 2010 <sup>33</sup>         | Korea                                            | Prospective hospital based cohort         | KM, Cox regression                  | 15                     | 15                 | 15                                      | 12.5                         | 15                                          | 72.5                         | +                                                    |
| 12. | Møller et al, 2005 <sup>34</sup>      | USA                                              | Prospective hospital based cohort         | KM, Logistic regression             | 13.5                   | 15                 | 12.5                                    | 15                           | 15                                          | 71                           | +                                                    |
| 13. | Cappola et al, 2012 <sup>35</sup>     | USA, 35% black and 65% whites                    | Prospective hospital based cohort         | KM, Cox regression                  | 13.5                   | 7.5                | 12.5                                    | 15                           | 15                                          | 62.5                         | +                                                    |
| 14. | Szwejkowski et al, 2011 <sup>36</sup> | UK                                               | Retrospective hospital based cohort       | KM, Cox regression                  | 13.5                   | 10                 | 10                                      | 15                           | 15                                          | 61                           | +                                                    |
| 15. | Abramson et al, 1992 <sup>37</sup>    | USA                                              | Prospective hospital based cohort         | KM, Cox regression                  | 12                     | 15                 | 10                                      | 15                           | 12.5                                        | 64.5                         | +                                                    |
| 16. | Kjaergaard et                         | Denmark                                          | Prospective hospital                      | KM, Cox                             | 13.5                   | 15                 | 12.5                                    | 15                           | 15                                          | 71                           | +                                                    |



|    |     |                                                                |                                      |                                                           |                                                           |      |      |      |      |      |      |     |
|----|-----|----------------------------------------------------------------|--------------------------------------|-----------------------------------------------------------|-----------------------------------------------------------|------|------|------|------|------|------|-----|
| 1  |     |                                                                |                                      |                                                           |                                                           |      |      |      |      |      |      |     |
| 2  |     |                                                                |                                      |                                                           |                                                           |      |      |      |      |      |      |     |
| 3  |     |                                                                |                                      |                                                           |                                                           |      |      |      |      |      |      |     |
| 4  | 17. | al, 2007 <sup>38</sup><br>Shalaby et al,<br>2008 <sup>39</sup> | USA, 95%<br>Caucasians               | based cohort<br>Retrospective<br>hospital based<br>cohort | regression<br>KM, Cox<br>regression                       | 13.5 | 12.5 | 15   | 15   | 15   | 71   | +   |
| 5  |     |                                                                |                                      |                                                           |                                                           |      |      |      |      |      |      |     |
| 6  | 18. | Damy et al,<br>2010 <sup>16</sup>                              | United<br>Kingdom                    | Prospective hospital<br>based cohort                      | KM, logistic and<br>Cox regression                        | 15   | 10   | 15   | 15   | 15   | 70   | +   |
| 7  | 19. | Ristow et al,<br>2007 <sup>40</sup>                            | USA                                  | Prospective hospital<br>based cohort                      | Logistic<br>regression                                    | 13.5 | 12.5 | 10   | 15   | 5    | 48.5 | +/- |
| 8  | 20. | Grigioni et al,<br>2006 <sup>41</sup>                          | Italy                                | Retrospective<br>cohort                                   | KM, logistic<br>regression                                | 13.5 | 12.5 | 12.5 | 15   | 15   | 68.5 | +/- |
| 9  | 21. | Levine et al,<br>1996 <sup>42</sup>                            | USA, mainly<br>Caucasians<br>(78.3%) | Retrospective<br>cohort                                   | No logistic<br>regression, no KM<br>analysis              | 12   | 10   | 10   | 7.5  | 2.5  | 42   | -   |
| 10 | 22. | Lam et al,<br>2010 <sup>14</sup>                               | USA                                  | Prospective<br>observational<br>community based<br>cohort | KM, Logistic<br>regression                                | 12   | 15   | 10   | 15   | 12.5 | 68   | +   |
| 11 |     |                                                                |                                      |                                                           |                                                           |      |      |      |      |      |      |     |
| 12 | 23. | Kush et al,<br>2009 <sup>12</sup>                              | Multicentric<br>USA and<br>Canada    | Prospective cohort<br>in the ESCAPE trial                 | KM                                                        | 15   | 10   | 15   | 15   | 12.5 | 68.5 | +   |
| 13 | 24. | Ghio et al,<br>2001 <sup>43</sup>                              | Italy                                | Prospective cohort                                        | KM, Cox<br>regression                                     | 13.5 | 12.5 | 12.5 | 12.5 | 12.5 | 63.5 | +   |
| 14 | 25. | Wang et al,<br>2010 <sup>17</sup>                              | China                                | Retrospective<br>cohort                                   | KM                                                        | 12   | 12.5 | 12.5 | 12.5 | 5    | 54.5 | +/- |
| 15 | 26. | Ghio et al,<br>2013 <sup>44</sup>                              | Italy                                | Prospective cohort                                        | KM, Cox and<br>logistic regression                        | 13.5 | 10   | 10   | 15   | 15   | 63.5 | +   |
| 16 | 27. | Naidoo et al,<br>1991 <sup>45</sup>                            | South Africa,<br>Blacks              | Retrospective<br>cohort                                   | No logistic<br>regression, no<br>Kaplan Meier<br>analysis | 12   | 7.5  | 10   | 5    | 7.5  | 42   | -   |
| 17 | 28. | Fawzy et al,<br>2004 <sup>19</sup>                             | Saudi Arabia                         | Prospective cohort                                        | No logistic<br>regression, no<br>Kaplan Meier             | 12   | 10   | 12.5 | 15   | 7.5  | 57   | +/- |
| 18 | 29. | Roseli et al,<br>2002 <sup>46</sup>                            | USA                                  | Retrospective<br>hospital based<br>cohort                 | KM, Cox<br>regression                                     | 13.5 | 10   | 10   | 15   | 12.5 | 63.5 | +/- |
| 19 | 30. | Melby et al,<br>2011 <sup>47</sup>                             | USA                                  | Retrospective<br>hospital based<br>cohort                 | KM, Cox<br>regression                                     | 13.5 | 12.5 | 10   | 15   | 15   | 66   | +   |
| 20 | 31. | Le Tourneau et<br>al, 2010 <sup>48</sup>                       | France,<br>mainly<br>Caucasians      | Prospective hospital<br>based cohort                      | KM, Cox<br>regression                                     | 13.5 | 10   | 10   | 15   | 15   | 63.5 | +   |
| 21 | 32. | Parker et al,<br>2010 <sup>7</sup>                             | USA                                  | Retrospective<br>hospital based<br>cohort                 | KM, Cox<br>regression                                     | 12   | 15   | 12.5 | 15   | 15   | 71   | +   |
| 22 | 33. | Kainuma et al,<br>2011 <sup>49</sup>                           | Japan, Asians                        | Retrospective<br>hospital based<br>cohort                 | KM, Cox<br>regression                                     | 10.5 | 10   | 12.5 | 12.5 | 10   | 55.5 | +/- |
| 23 | 34. | Barbieri et al,<br>2010 <sup>11</sup>                          | Multicentric<br>(Europe and<br>USA)  | Prospective hospital<br>based cohort                      | KM, Cox<br>regression                                     | 13.5 | 15   | 12.5 | 15   | 15   | 71   | +   |
| 24 |     |                                                                |                                      |                                                           |                                                           |      |      |      |      |      |      |     |
| 25 |     |                                                                |                                      |                                                           |                                                           |      |      |      |      |      |      |     |
| 26 |     |                                                                |                                      |                                                           |                                                           |      |      |      |      |      |      |     |
| 27 |     |                                                                |                                      |                                                           |                                                           |      |      |      |      |      |      |     |
| 28 |     |                                                                |                                      |                                                           |                                                           |      |      |      |      |      |      |     |
| 29 |     |                                                                |                                      |                                                           |                                                           |      |      |      |      |      |      |     |
| 30 |     |                                                                |                                      |                                                           |                                                           |      |      |      |      |      |      |     |
| 31 |     |                                                                |                                      |                                                           |                                                           |      |      |      |      |      |      |     |
| 32 |     |                                                                |                                      |                                                           |                                                           |      |      |      |      |      |      |     |
| 33 |     |                                                                |                                      |                                                           |                                                           |      |      |      |      |      |      |     |
| 34 |     |                                                                |                                      |                                                           |                                                           |      |      |      |      |      |      |     |
| 35 |     |                                                                |                                      |                                                           |                                                           |      |      |      |      |      |      |     |
| 36 |     |                                                                |                                      |                                                           |                                                           |      |      |      |      |      |      |     |
| 37 |     |                                                                |                                      |                                                           |                                                           |      |      |      |      |      |      |     |
| 38 |     |                                                                |                                      |                                                           |                                                           |      |      |      |      |      |      |     |
| 39 |     |                                                                |                                      |                                                           |                                                           |      |      |      |      |      |      |     |
| 40 |     |                                                                |                                      |                                                           |                                                           |      |      |      |      |      |      |     |
| 41 |     |                                                                |                                      |                                                           |                                                           |      |      |      |      |      |      |     |
| 42 |     |                                                                |                                      |                                                           |                                                           |      |      |      |      |      |      |     |
| 43 |     |                                                                |                                      |                                                           |                                                           |      |      |      |      |      |      |     |
| 44 |     |                                                                |                                      |                                                           |                                                           |      |      |      |      |      |      |     |
| 45 |     |                                                                |                                      |                                                           |                                                           |      |      |      |      |      |      |     |
| 46 |     |                                                                |                                      |                                                           |                                                           |      |      |      |      |      |      |     |
| 47 |     |                                                                |                                      |                                                           |                                                           |      |      |      |      |      |      |     |
| 48 |     |                                                                |                                      |                                                           |                                                           |      |      |      |      |      |      |     |
| 49 |     |                                                                |                                      |                                                           |                                                           |      |      |      |      |      |      |     |

|     |                                     |               |                                     |                                          |      |     |     |      |      |      |     |
|-----|-------------------------------------|---------------|-------------------------------------|------------------------------------------|------|-----|-----|------|------|------|-----|
| 35. | Manners et al, 1977 <sup>50</sup>   | United Kindom | Retrospective hospital based cohort | No regression analysis, no KM estimation | 10.5 | 7.5 | 5   | 5    | 2.5  | 30.5 | -   |
| 36. | Malouf et al, 2002 <sup>51</sup>    | USA           | Prospective hospital based cohort   | KM, Cox and logistic regression          | 10.5 | 10  | 10  | 15   | 12.5 | 58   | +   |
| 37. | Khandhar et al, 2009 <sup>52</sup>  | USA           | Retrospective hospital based cohort | KM, Cox regression                       | 13.5 | 10  | 10  | 15   | 12.5 | 61   | +/- |
| 38. | Zuern et al, 2012 <sup>53</sup>     | Germany       | Prospective hospital based cohort   | KM, Cox regression                       | 15   | 7.5 | 10  | 15   | 15   | 62.5 | +   |
| 39. | Ben-Dor et al, 2011 <sup>21</sup>   | USA           | Prospective hospital based cohort   | KM, Logistic regression                  | 15   | 10  | 10  | 15   | 15   | 68   | +   |
| 40. | Yang et al, 2012 <sup>54</sup>      | USA           | Retrospective hospital based cohort | KM, Cox and logistic regression          | 15   | 7.5 | 15  | 12.5 | 15   | 65   | +   |
| 41. | Nozohoor et al, 2012 <sup>55</sup>  | Sweden        | Retrospective cohort                | KM, Cox and logistic regression          | 13.5 | 10  | 10  | 15   | 12.5 | 61   | +   |
| 42. | Ward and Hancock 1975 <sup>18</sup> | UK            | Retrospective cohort                | No KM, no logistic or Cox regression     | 12   | 5   | 2.5 | 7.5  | 2.5  | 29.5 | -   |
| 43. | Ghoreishi et al, 2012 <sup>56</sup> | USA           | Retrospective cohort                | KM, Cox and logistic regression          | 15   | 10  | 10  | 10   | 15   | 60   | +   |
| 44. | Cam A et al, 2011 <sup>22</sup>     | USA           | Retrospective cohort                | KM, Cox and logistic regression          | 13.5 | 15  | 10  | 10   | 12.5 | 61   | +   |
| 45. | Pai et al, 2007 <sup>57</sup>       | USA           | Retrospective cohort                | KM, Cox and logistic regression          | 15   | 10  | 10  | 10   | 15   | 60   | +   |

KM: Kaplan Meier; UK: United Kindom; USA:United states of America

**Table 2: Study characteristics of studies on mortality and readmissions for heart failure in patients with pulmonary hypertension associated with left heart disease**

| Author, Year published                                             | Diagnostic criteria (RVSP by echocardiography or mPAP by echocardiography or RHC) | Study population (sample size, heart disease, NYHA class, type of HF)                                                                        | Mean / Median follow up (months) | Age-Years / Male sex-%   | Definition of outcomes predicted          | Proportion (%) of measurable RVSP | Median/Mean (mm Hg) baseline RVSP (echo) or mPAP (RHC) | Prevalence of PH at baseline (%) | HF readmission rate or adjusted Odd/Hazard ratios and CI | Mortality (all cause) rate at 6, 12, 24, 36 months or at mean duration of follow up |                                       |              |                                | Adjusted odd/Hazard ratios and CI (or p value) for all-cause mortality, outcome            |
|--------------------------------------------------------------------|-----------------------------------------------------------------------------------|----------------------------------------------------------------------------------------------------------------------------------------------|----------------------------------|--------------------------|-------------------------------------------|-----------------------------------|--------------------------------------------------------|----------------------------------|----------------------------------------------------------|-------------------------------------------------------------------------------------|---------------------------------------|--------------|--------------------------------|--------------------------------------------------------------------------------------------|
|                                                                    |                                                                                   |                                                                                                                                              |                                  |                          |                                           |                                   |                                                        |                                  |                                                          | 6                                                                                   | 12                                    | 24           | 36 or at mean/median follow up |                                                                                            |
| <b>Studies in patients with heart failure and cardiomyopathies</b> |                                                                                   |                                                                                                                                              |                                  |                          |                                           |                                   |                                                        |                                  |                                                          |                                                                                     |                                       |              |                                |                                                                                            |
| Merlos et al, 2013 <sup>26</sup>                                   | RVSP>35 mm Hg                                                                     | 1210 consecutive patients with HF, stratified into normal (RVSP<35), mild (RVSP 36-45), moderate (RVSP 46-60) and severe PH (RVSP >60 mm Hg) | 12                               | 72.6 / 54.1%             | All cause mortality Cardiovascular deaths | 41.5                              | 46                                                     | 35.2                             | NR                                                       | NR                                                                                  | 4.89 per 10 person-years in severe PH | NA           | NA                             | OR for mild PH 1.6 (0.7-3.74), moderate PH 1.34 (0.54-3.16) and severe PH 2.57 (1.07-6.27) |
| Agawal et al, 2012 <sup>27</sup>                                   | RHC with mPAP>25 mm Hg                                                            | 339 patients with PH and LHD, 90% with HFpEF, NYHA class NR                                                                                  | 54.2                             | 63 / 21%                 | All cause mortality                       | NA                                | 43                                                     | NA                               | NR                                                       | NR                                                                                  | 2.9%                                  | 4.4%         | 6.8%                           | UTSW cohort HR 1.4 (1.1-1.9) and NU cohort HR 1.4 (1.1-1.7)                                |
| Agawal, 2012 <sup>28</sup>                                         | RVSP>35                                                                           | 288 patients undergoing hemodialysis stratified into PH and NPH-based on RVSP                                                                | 25.8                             | 56.5 vs 53.1 / 65 vs 63% | All cause mortality                       | NA                                | 44.7 vs 27.2                                           | 38                               | NR                                                       | NR                                                                                  | 26.4 vs 24.5                          | 48.3 vs 46.3 | 62.9 vs 56.3                   | HR 2.17 (1.31-3.61)                                                                        |

|                                                                                              |                                   |                                                 |                                                                                                                                           |    |                     |                                        |    |                |      |                                |                    |                                                      |               |                         |                                                                    |
|----------------------------------------------------------------------------------------------|-----------------------------------|-------------------------------------------------|-------------------------------------------------------------------------------------------------------------------------------------------|----|---------------------|----------------------------------------|----|----------------|------|--------------------------------|--------------------|------------------------------------------------------|---------------|-------------------------|--------------------------------------------------------------------|
| 1<br>2<br>3<br>4<br>5<br>6<br>7<br>8<br>9<br>10                                              | Aronson et al, 2011 <sup>29</sup> | RHC with mPAP $\geq$ 25 mmHg and mPCWP >15 mmHg | 242 patients with acute HF, divided in 3 groups, NPH, passive PH and reactive PH, NYHA class IV                                           | 6  | 61; 42%             | All cause mortality                    | NA | 34 vs 38 vs 44 | 76.0 | NR                             | 8.6 vs 21. vs 48.3 | NR                                                   | NR            | NR                      | HR for passive PH 1.7 (0.6-4.5) and reactive PH 4.8 (2.1-17.5)     |
| 11<br>12<br>13<br>14<br>15<br>16<br>17<br>18                                                 | Bursi et al, 2012 <sup>13</sup>   | RVSP > 35 mm Hg                                 | 1049 patients with HF stratified into tertiles of RVSP (<41, 41-54 and >54 mm Hg)                                                         | 81 | 76; 49.3%           | All cause mortality                    | NR | 48             | 79   | NA                             | NR                 | 4, 10, and 17% for tertiles 1, 2, and 3 respectively | 8 vs 19 vs 28 | 46*                     | HR for tertile 2: 1.45 (1.13-1.85) and tertile 3: 2.07 (1.62-2.64) |
| 19<br>20<br>21<br>22<br>23<br>24<br>25<br>26<br>27<br>28<br>29                               | Strange et al, 2012 <sup>15</sup> | RVSP > 40 mm Hg                                 | 15633 echo screening, 636 PH group 2 stratified into 3 groups (group 1 RVSP < 40 mm Hg, group 2 between 41 and 60 and group 3 > 60 mm Hg) | 83 | 79; 48%             | All cause mortality                    | NR | 52             | NR   | NA                             | NR                 | NR                                                   | NR            | Mean survival 4.2 years | NR                                                                 |
| 30<br>31<br>32<br>33<br>34<br>35<br>36<br>37<br>38<br>39<br>40<br>41<br>42<br>43<br>44<br>45 | Mutlak et al, 2012 <sup>30</sup>  | RVSP > 35 mm Hg                                 | 1054 patients with acute myocardial infarction divided into NPH and PH groups                                                             | 12 | 60 vs 69; 77 vs 64% | Readmission for HF All cause mortality | NR | 32 vs 43       | 44.6 | 2.1 vs 9.2; OR 3.1 (1.87-5.14) | NR                 | NR                                                   | NR            | NR                      | HR for readmission 3.1 (1.87-5.14)                                 |

|    |                                  |                                                   |                                                                                                                                                                                                            |      |                             |                                                             |    |                                                                                           |      |                 |    |                                                                  |                                                                  |                                                                    |                                           |
|----|----------------------------------|---------------------------------------------------|------------------------------------------------------------------------------------------------------------------------------------------------------------------------------------------------------------|------|-----------------------------|-------------------------------------------------------------|----|-------------------------------------------------------------------------------------------|------|-----------------|----|------------------------------------------------------------------|------------------------------------------------------------------|--------------------------------------------------------------------|-------------------------------------------|
| 1  |                                  |                                                   |                                                                                                                                                                                                            |      |                             |                                                             |    |                                                                                           |      |                 |    |                                                                  |                                                                  |                                                                    |                                           |
| 2  |                                  |                                                   |                                                                                                                                                                                                            |      |                             |                                                             |    |                                                                                           |      |                 |    |                                                                  |                                                                  |                                                                    |                                           |
| 3  | Tatebe et al, 2012 <sup>31</sup> | RHC with mPAP $\geq$ 25 mmHg<br>mPCWP >15 mmHg    | 676 consecutive patients with chronic HF, NYHA class $\geq$ 2, stratified into 3 groups, NPH (mPAP<25), passive PH (PH with PVR $\geq$ 2.5 WU) or reactive PH (PH with PVR >2.5 WU)                        | 31.2 | 64vs 64vs 63; 63vs 48vs 66% | All cause mortality and readmission for HF                  | NR | 17 vs 30 vs 35 in NPH, passive PH and reactive PH respectively                            | 23   | NR              | NR | 24.5 vs 18 vs 18.9% in NPH, passive and reactive PH respectively | 52.5 vs 50 vs 60.3% in NPH, passive and reactive PH respectively | 71.0 vs 77 vs 79.3 in NPH, passive PH and reactive PH respectively | HR for reactive PH group 1.18 (1.03-1.35) |
| 17 | Adhyapak, 2010 <sup>8</sup>      | Echocardiography with mPAP > 25 mm Hg             | 147 patients with HF stratified into: group 1, normal PASP/ preserved RV function; group 2, normal PASP/ RV dysfunction; group 3, high PASP/ preserved RV function; and group 4, high PASP/ RV dysfunction | 11.2 | 54 91.8%                    | Cardiac death Readmissions                                  | NR | Group 1 20 $\pm$ 5 group 2 24.8 $\pm$ 0.4 group 3 56.8 $\pm$ 6 and group 4 58.9 $\pm$ 8.8 | 53.7 | 19.7, OR and CI | NR | Overall 5.1 at 11.2 months, 4.5 in group 3 vs 8.8 in group 4     | NA                                                               | NA                                                                 | HR in PH 2.27 (1.09-3.57)                 |
| 33 | Stern et al, 2007 <sup>32</sup>  | Echocardiography but criteria for PH not reported | 68 patients needing cardiac resynchronization stratified into group1 (RVSP $\geq$ 50 mmHg, n = 27) and group2(RVSP < 50 mmHg, n                                                                            | 7.1  | 70 64.7%                    | composite of hospitalization for HF and all cause mortality | NR | Group 1 39.7 $\pm$ 6.7 and group 2 60.2 $\pm$ 9.2                                         | NR   | NR              | NR | Increase in mortality in patients with RVSP $\geq$ 50 mm Hg      | NR                                                               | NR                                                                 | HR of 2.0 (1.2-5.5) for RVSP $\geq$ 50    |

= 41)

|                                   |                          |                                                                                                                                                                                      |      |                                                                                         |                     |    |                                                            |    |    |    |    |                                                        |                                                                      |                                                                        |
|-----------------------------------|--------------------------|--------------------------------------------------------------------------------------------------------------------------------------------------------------------------------------|------|-----------------------------------------------------------------------------------------|---------------------|----|------------------------------------------------------------|----|----|----|----|--------------------------------------------------------|----------------------------------------------------------------------|------------------------------------------------------------------------|
| Lee et al, 2010 <sup>33</sup>     | RVSP>39 mm Hg            | 813 patients with TR stratified into two groups based on the RVSP < 39 mmHg (group 1, n = 530) and RVSP ≥ 39 mmHg (group 2, n = 283)                                                 | 58.8 | 64<br>42.5%                                                                             | All cause mortality | NR | 37.1 in patients who survived vs 43.8 in patients who died | NR | NR | NR | NR | 10.5 vs 21.9                                           | 5-year survival rates 61.0 and 80.6% group 2 vs group 1 respectively | HR of 1.024 (1.017–1.032)                                              |
| Møller et al, 2005 <sup>34</sup>  | RVSP>30 mm Hg            | 536 patients with acute myocardial infarction stratified into group 1 (RVSP< 30 mm Hg), group 2 mild to moderate PH (RVSP of 31 to 55 mm Hg) and group 3 severe PH (RVSP > 55 mm Hg) | 40   | 65/<br>68%<br>74/54<br>%<br>78/44<br>% in<br>group<br>1, 2<br>and 3<br>respect<br>ively | All cause mortality | 69 | NR                                                         | 75 | NR | NR | NR | 5% in group 1<br>52% in patients with a RVSP>6 5 mm Hg | NR                                                                   | HR 1.22 (1.14–1.38) per 10 mm Hg increased                             |
| Cappola et al, 2012 <sup>35</sup> | RHC with mPAP ≥ 25 mm Hg | 1134 patients with cardiomyopathy stratified according to PVR: NPH (<2.5), group 1 PH (2.5-3),                                                                                       | 52.8 | 48<br>60%                                                                               | All cause mortality | NA | 25                                                         | NR | NR | NR | NR | NR                                                     | 33% of patients died during the mean FU                              | HR 1.86 (1.30–2.65) for group 2, 1.78 (1.13–2.81) for group 3 and 2.04 |

|                                       |                                                 |                                                                                                                                                                         |      |               |                                                                         |    |         |                                                           |                                          |    |                                        |    |                                           |                                                            |
|---------------------------------------|-------------------------------------------------|-------------------------------------------------------------------------------------------------------------------------------------------------------------------------|------|---------------|-------------------------------------------------------------------------|----|---------|-----------------------------------------------------------|------------------------------------------|----|----------------------------------------|----|-------------------------------------------|------------------------------------------------------------|
|                                       |                                                 | group2 PH (3-3.5), group3 PH(3.5-4) and group4 PH (>4)                                                                                                                  |      |               |                                                                         |    |         |                                                           |                                          |    |                                        |    | (1.51-2.74) for group4                    |                                                            |
| Szwejkowski et al, 2011 <sup>36</sup> | RVSP>33 mm Hg                                   | 1612 patients with HF stratified into 5 groups according to RVSP (< 33; 33-38; 39-44; 45-52 and >52 mmHg)                                                               | 33.6 | 75.2<br>57.4% | All cause mortality                                                     | 32 | 46      | 83.3                                                      | NR                                       | NR | NR                                     | NR | 55.1% of patients died during the mean FU | HR 1.06 (1.03-1.08) for every 5 mm Hg increase in RVSP     |
| Abramson et al, 1992 <sup>37</sup>    | Echocardiography with TRV>2.5 m/s               | 108 patients with dilated cardiomyopathy, stratified into 2 groups: group 1 (TRV< 2.5 m/s) and group 2 (>2.5 m/s), 38.9% in NYHA class III and IV, 77.3% of ischemic HF | 28   | 67.5<br>81%   | All cause mortality, mortality due to HF and re-hospitalizations for HF | NR | 5.6 m/s | 26                                                        | 75% during the study period (1.97-16.90) | NR | NR                                     | NR | 17% in 28 months vs 57%                   | OR for increased TRV 3.77 (1.38-10.24)                     |
| Kjaergaard et al, 2007 <sup>38</sup>  | Echocardiography but cutoff for PH not reported | 388 consecutive patients with known or presumed HF stratified into quartiles of RVSP (<31, 31-38, 39-50, >50)                                                           | 33.6 | 75<br>60%     | All cause mortality                                                     | NR | 38      | 75% and 50% with RVSP> 31 mm Hg and 40 mm Hg respectively | NR                                       |    | 48% if COPD and 21% in HF without COPD | NR | 57% at 33.6 months                        | HR 1.09 (1.04-1.14) for every increase of RVSP per 5 mm Hg |
| Shalaby et al, 2008 <sup>39</sup>     | RVSP≥30 mm Hg                                   | 270 patients undergoing cardiac resynchronization                                                                                                                       | 19.4 | 66.5<br>91%   | All cause mortality, cardiac transplantation (primary                   | NR | 40.4    | NR                                                        | 40% in group 3 vs 9% in group 1 [6.35    | NR | NR                                     | NR | 12% in group 1 vs 34% in group 3 at mean  | HR 2.62 (1.07-6.41)                                        |

|                                    |                                              |                                                                                                                                                                      |    |                                                 |                                                                               |                                                                |    |                                                           |                                                                                           |    |    |                           |                                        |                                                                                                         |
|------------------------------------|----------------------------------------------|----------------------------------------------------------------------------------------------------------------------------------------------------------------------|----|-------------------------------------------------|-------------------------------------------------------------------------------|----------------------------------------------------------------|----|-----------------------------------------------------------|-------------------------------------------------------------------------------------------|----|----|---------------------------|----------------------------------------|---------------------------------------------------------------------------------------------------------|
|                                    |                                              | stratified into 3 groups on the basis of RVSP: group 1, (22 to 29, n= 86); group 2 (30 to 44, n=90) and group 3 (45 to 88, n=94).                                    |    |                                                 | end point) or re-hospitalization for HF                                       |                                                                |    |                                                           | (2.55–15.79)]                                                                             |    |    |                           | follow up                              |                                                                                                         |
| Damy et al, 2010 <sup>16</sup>     | Echocardiography with RVTG>25 mm Hg          | 1380 patients with congestive HF, 1026 with LVSD (EF<45%) and 324 without), further stratified into quartiles of RVSP                                                | 66 | 72<br>67%                                       | All cause mortality                                                           | 30% of all, 26% in patients with LVSD and 40% in those without | 25 | 46% of HFpEF, 50% of HFrEF and 23% of patients without HF | NA (outpatient cohort)                                                                    | NR | NR | NR                        | 40.3% at median follow up of 66 months | HR 1.72(1.16–2.55) for RVSP>45 mm Hg)                                                                   |
| Ristow et al, 2007 <sup>40</sup>   | Echocardiography with TR gradient > 30 mm Hg | 717 patients with coronary artery disease, 573 with measurable TR, stratified into group 1 (TR gradient ≤30 mm Hg, n=447) and group 2 (TR gradient >30 mm Hg, n=126) | 36 | 65,<br>74%<br>(group 1) 69,<br>75%<br>(group 2) | hospitalization, CV death, all-cause death, and the combined end point of all | 80                                                             | NR | 22                                                        | 6% (group I) vs 21% (group II) OR per each 10 mm Hg increase of TR gradient 1.5(1.03-2.2) | NR | NR | NR                        | 11% (group I) vs 17% (group II)        | OR for all cause deaths 1.2(0.85-1.6) per 10 mm Hg increase in TR OR for combined endpoint 1.6(1.1-2.4) |
| Grigioni et al, 2006 <sup>41</sup> | RHC with mPAP ≥25 mm Hg                      | 196 patients with HF evaluated for PH and changes in mPAP                                                                                                            | 24 | 54<br>73%                                       | Cardiovascular deaths, acute HF and combined end point of both                | NA                                                             | 25 | NR                                                        | 27% acute HF, 2.30(1.4-2-3.73)                                                            | NR | NR | 20% cardiovascular deaths | NR                                     | HR for PH 2.3 (1.42-3.73) ; HR for worsening >30% in mPAP 2.6(1.45-                                     |



4.67)

|                                  |                                                                               |                                                                                                                                                                        |      |                                                     |                                            |                                         |                                                                             |                                        |                           |          |                                                  |                                                  |                                                                      |                                                        |
|----------------------------------|-------------------------------------------------------------------------------|------------------------------------------------------------------------------------------------------------------------------------------------------------------------|------|-----------------------------------------------------|--------------------------------------------|-----------------------------------------|-----------------------------------------------------------------------------|----------------------------------------|---------------------------|----------|--------------------------------------------------|--------------------------------------------------|----------------------------------------------------------------------|--------------------------------------------------------|
| Levine et al, 1996 <sup>42</sup> | RHC assessed change in PH, no definition                                      | 60 patients with PH owing to HF awaiting heart transplantation, stratified into 2 groups: group A (persistent elevated sPAP, n=31), group B (decrease in sPAP, n = 29) | 10   | 50/85%                                              | Transplant or all cause death              | NA                                      | 39 vs 57 in group A and group B respectively                                | NA                                     | NR                        | NR       | NR                                               | NR                                               | 90% vs 50% of death at 10 months in group A and group B respectively | NR                                                     |
| Lam al, 2010 <sup>14</sup>       | RVSP> 35 mm Hg                                                                | 244 patients with HFpEF compared with 719 subjects with HTN. 203 patients with HFpEF and PH later stratified into: group 1 (RVSP<48 mm Hg) and group 2 (RVSP>48 mm Hg) | 33.6 | 74/47% vs 79*/41% in group1 and group2 respectively | All cause mortality                        | 65 vs 83% in HTN and HFpEF respectively | 28 vs 48 mm Hg in HTN and HFpEF respectively                                | 8 vs 83% in HTN and HFpEF respectively | NR                        | NR       | 12.2 vs 25.7 in group 1 and group 2 respectively | 18.4 vs 36.2 in group 1 and group 2 respectively | 55.1 vs 63.8 in group 1 and group 2 respectively                     | HR 1.20 per each increase of 10 mmHg in RVSP (p<0.001) |
| Kush et al, 2009 <sup>12</sup>   | RHC with mixed PH (MPH) defined as mPAP≥25 mm Hg, PCWP>15 mm Hg, and PVR≥3 WU | 171 patients with severe HFrEF (NYHA class IV, LVEF≤30%, systolic BP ≤125 mm Hg) further stratified into 2                                                             | 6    | 59/75% vs 54*/71% in MPH and non-MPH respectively   | Rehospitalizations and all cause mortality | NA                                      | mPAP: 42 vs 32 in MPH and non-MPH respectively<br>TPG: 17 vs 7 respectively | 47                                     | HR for MPH 0.8(0.59-1.08) | 21 vs 22 | NR                                               | NR                                               | NR                                                                   | HR for MPH 0.89(0.66-1.20)                             |

|                                |                                                                     | groups: MPH<br>group<br>(mPAP>25<br>mm Hg and<br>PVR>3 WU,<br>n= 80) and<br>non-MPH<br>(mPAP<25<br>mm Hg or<br>PVR<3WU,<br>n=91)                                                                      |           |               |                                                |    |      |      |    |                                                |    |    |                                                                |                                                                                                            |
|--------------------------------|---------------------------------------------------------------------|-------------------------------------------------------------------------------------------------------------------------------------------------------------------------------------------------------|-----------|---------------|------------------------------------------------|----|------|------|----|------------------------------------------------|----|----|----------------------------------------------------------------|------------------------------------------------------------------------------------------------------------|
| Ghio et al, 2001 <sup>43</sup> | RHC with mPAP≥20 mm Hg, RV systolic dysfunction defined as RVEF<35% | 377 patients with HF stratified into: group 1, normal mPAP/preserved RVEF (n=73); group 2 normal mPAP/low RVEF (n=68); group3, high PAP/preserved RVEF (n=21); and group 4, high PAP/low RVEF (n=215) | 17.2      | 51<br>85.7%   | Heart transplantati on and All cause mortality | NA | 27.9 | 62.3 | NR | NR                                             | NR | NR | 7.3 vs 12.3 vs 23.8 vs 40 in group 1, 2, 3 and 4* respectively | HR 1.1(1.0-1.21) per each 5-mmHg increment                                                                 |
| Wang et al, 2010 <sup>17</sup> | RVSP> 30 mm Hg                                                      | 93 patients with HF undergoing cardiac resynchronizat ion stratified into Group1: (RVSP>50mm H, n=29); Group2: (30<RVSP≤50 mmHg, n=17) and Group3:                                                    | 32 (6-60) | 59.6<br>81.7% | All cause mortality, HF mortality              | NR | NR   | 49.5 | NR | 28 vs 6 vs 17% in group1,2, and 3 respectively | NR | NR | NR                                                             | Non-significant increased in all cause mortality (p=0.33), increase in HF mortality but OR/HR not reported |

| (RVSP≤30mm Hg, n=47)                                |                                                         |                                                                                                                                                                           |    |                                                                   |                                                                                  |    |                                                     |                                                     |    |                                  |                               |                                |                                       |                                                                 |
|-----------------------------------------------------|---------------------------------------------------------|---------------------------------------------------------------------------------------------------------------------------------------------------------------------------|----|-------------------------------------------------------------------|----------------------------------------------------------------------------------|----|-----------------------------------------------------|-----------------------------------------------------|----|----------------------------------|-------------------------------|--------------------------------|---------------------------------------|-----------------------------------------------------------------|
| Ghio et al, 2013 <sup>44</sup>                      | RVSP>40 mm Hg and RV dysfunction defined as TAPSE<14 mm | 658 patients with chronic HF stratified into group 1 (no PH no RVD, n=256), group 2(RVD, no PH, n=54), group 3(PH, no RVD, n=167), and group 4(RVD and PH, n=67)          | 38 | 63<br>86%                                                         | All cause mortality, urgent cardiac transplantati on or ventricular fibrillation | 83 | 38                                                  | 35.6                                                | NR | 17.5% in PH vs 4.5% in non PH    | 21.4% in PH vs 8.7% in non PH | 42.3% in PH vs 20.3% in non PH | 59.4% in PH vs 45.2% in non PH        | HR 1.90 (2.18–3.06) for group3 and 4.27 (3.45–7.43) for group 4 |
| <b>Studies in patients with heart valve disease</b> |                                                         |                                                                                                                                                                           |    |                                                                   |                                                                                  |    |                                                     |                                                     |    |                                  |                               |                                |                                       |                                                                 |
| Fawzy et al, 2004 <sup>19</sup>                     | Severe PH defined as RVSP> 50 mm Hg                     | 559 patients with MS undergoing MBV stratified into three groups: group A (RVSP<50 mmHg; n = 345); group B (RVSP 50-79 mmHg; n = 183) and group C (RVSP ≥80 mmHg; n = 31) | 63 | 31/28.1% vs 30/25.1% vs 27/16.1% in group A, B and C respectively | Reversibility of PH following MBV                                                | NR | 38.5 vs 59 vs 97.8 in group A, B and C respectively | 62% vs 33% vs 5% for group A, B, and C respectively | NR | 0                                | 0                             | 0                              | 0                                     | No mortality was encountered, PH normalized over a 6-12 months  |
| Naidoo et al, 1991 <sup>45</sup>                    | RHC with PASP≥30 mm Hg                                  | 139 patients with AR (69 undergoing AVS) stratified into group I (normal or mild PH) and group II (moderate PH or marked PH)                                              | 6  | 32.9 vs 36.2 and 69.7 vs 77.8 in group I and II respectively      | Immediate and 6 months post-operative mortality                                  | NA | 18 vs 43.7 in group I and II respectively           | 63.3                                                | NR | 3 in group I vs 2.8% in group II | NR                            | NR                             | NR                                    | No increased in mortality, HR not reported                      |
| Manners et al, 1977 <sup>50</sup>                   | RHC with PASP > 70 mm Hg                                | 392 patients who had undergone prosthetic valve surgery stratified into 2 PASP<70 mm Hg,                                                                                  | 48 | NR                                                                | Hospital mortality                                                               | NA | Mean PASP was 93 mm Hg                              | NR                                                  | NR | NR                               | NR                            | NR                             | 5.4% at 4 years in both PH and non PH | NR                                                              |

|                                       |                | n=336 or PASP>70 mm Hg, n=56)                                                                                                                        |    |              |               |                               |                                             |    |                |                       |    |      |                                                                                    |                                           |                              |                                                                                      |
|---------------------------------------|----------------|------------------------------------------------------------------------------------------------------------------------------------------------------|----|--------------|---------------|-------------------------------|---------------------------------------------|----|----------------|-----------------------|----|------|------------------------------------------------------------------------------------|-------------------------------------------|------------------------------|--------------------------------------------------------------------------------------|
| Roseli et al, 2002 <sup>46</sup>      | RVSP>35 mm Hg  | 2385 patients undergoing AVR stratified into 3 groups: RVSP < 35 mm Hg n= 611; RVSP 35 -50 mm Hg, n= 1199; RVSP>50 mm Hg, n= 575                     | 51 | 74           | 74            | 55%                           | All cause hospital and late mortality       | NR | 41             | 74                    | NR | 15.8 | NR                                                                                 | NR                                        | NR                           | Higher RVSP was predictor of 5 and 10 years mortality, HR not reported               |
| Melby et al, 2011 <sup>47</sup>       | RVSP>35 mm Hg  | 1080 patients with AS undergoing AVR, stratified into NPH, (RVSP<35 mm Hg, n=574) and PH group ( mild PH, moderate and severe PH)                    | 48 | 72.3 vs 70.2 | 59.1 vs 57.8% | in PH and non PH respectively | All cause operative and long term mortality | NR | 51 in PH group | 46.8                  | NR | NR   | 17.1 vs 17.6 vs 17.1 vs 23.5 for non PH, mild, moderate and severe PH respectively | 25.7 vs 24 vs 23.2 vs 32.3                | 25.7 vs 38.4 vs 52.7 vs 46.1 | OR 1.51 (1.16-1.96), persistent PH after AVR was associated with Decreased survival. |
| Le Tourneau et al, 2010 <sup>48</sup> | RVSP≥50 mm Hg  | 256 patients with MR undergoing MVO, stratified into group1 (RVSP<50 mm Hg, n=174) and group2 (RVSP≥50 mm Hg, n=82)                                  | 49 | 63           | 66%           |                               | All cause mortality Cardiovascular deaths   | NR | 45±14          | 32% had RVSP≥50 mm Hg | NR | NR   | NR                                                                                 | 31.6 vs 31.7 in group1 and 2 respectively | NR                           | HR 1.43 (1.09-1.88) per 10 mmHg increment of RVSP                                    |
| Parker et al, 2010 <sup>7</sup>       | RVSP> 35 mm Hg | 1156 patients with MR or AR stratified into normal (RVSP<30 mm Hg), borderline (31–34 mm Hg), mild (35–40 mm Hg), or moderate or greater (>40 mm Hg) | 87 | 72           | 51%           |                               | All cause mortality                         | 52 | 29             | NR                    | NR | NR   | NR                                                                                 | NR                                        | NR                           | HR for moderate or greater PH 1.95(1.58–2.41) in AR and 1.48(1.26–1.75) in MR        |

|                                    |                                               |                                                                                                                                                                           |          |           |                                                                                                                                                         |                                                                   |          |                                                                          |                                                        |    |                                                        |                                                                             |                                                        |                                                                        |
|------------------------------------|-----------------------------------------------|---------------------------------------------------------------------------------------------------------------------------------------------------------------------------|----------|-----------|---------------------------------------------------------------------------------------------------------------------------------------------------------|-------------------------------------------------------------------|----------|--------------------------------------------------------------------------|--------------------------------------------------------|----|--------------------------------------------------------|-----------------------------------------------------------------------------|--------------------------------------------------------|------------------------------------------------------------------------|
| Barbieri et al, 2010 <sup>11</sup> | RVSP> 50 mm Hg                                | 437 patients with MR, 35% NYHA class III or IV, normal LVEF, stratified into NPH (RVSP≤50 mm Hg) and PH (RVSP>50 mm Hg)                                                   | 57<br>.6 | 67<br>66% | All cause mortality, cardiovascular death, heart failure                                                                                                | 45                                                                | 23       | 1.70 (1.10–2.62) and 1.19 (1.06–1.35) for each 10 mm Hg increase of RVSP | NR                                                     | NR | 23% at the mean follow up                              | HR 2.03 (1.30–3.18) and 1.16 (1.03–1.31) for each 10 mm Hg increase of RVSP |                                                        |                                                                        |
| Kainuma et al, 2011 <sup>49</sup>  | Echocardiography, PH definition not specified | 46 patients undergoing MVR, NYHA III or IV, LVEF<40%, stratified into group 1 (RVSP< 40 mm Hg, n=19), group 2 (moderate PH (40<RVSP<60, n=17) and group 3 (RVSP>60, n=10) | 36<br>R  | 64<br>35% | Cardiac death, myocardial infarction, endocarditis, thromboembolism, reoperation for recurrent MR, readmission for heart failure, and fatal arrhythmia. | NR                                                                | 47       | NR                                                                       | 30% in the severe PH but not significant, OR and CI NR | NR | 15.8 vs 11.8 vs 20% for group 1, 2, and 3 respectively | 31.6 vs 29.4 vs 30%<br>50%                                                  | 47.4 vs 82.4 vs 50%                                    | HR for all adverse cardiac events 6.9 (1.1-44) in group 3              |
| Khandhar et al, 2009 <sup>52</sup> | Severe PH defined as RVSP>60 mm Hg            | 506 patients with severe AR stratified into group 1, severe PH with RVSP>60 mm Hg, n= 83 and group 2 (RVSP<60, n=423), NYHA NR                                            | N<br>R   | 63<br>47% | All cause mortality                                                                                                                                     | 100                                                               | NR       | 16% of severe PH                                                         | NR                                                     | NR | NR                                                     | 21.6 of patients with severe PH                                             | NR                                                     | PH was associated with increased mortality in all groups, OR and CI NR |
| Malouf et al, 2002 <sup>51</sup>   | Severe PH defined as peak TRV≥4 m/s           | 3171 patients with AS of whom 47 with severe PH, stratified into group 1 (no AVR, n = 10) and group 2 (AVR, n= 37), 79% in NYHA III and IV                                | 15<br>.3 | 78<br>47% | All cause mortality                                                                                                                                     | 63% of the 3171 total population of patients with aortic stenosis | 4.16 m/s | NA                                                                       | NR                                                     | NR | NR                                                     | NR                                                                          | 80% vs. 32% in group 1 and 2 respectively at median FU | OR for mortality risk in severe PH and AVS 1.76 (0.81-3.35)            |

|                                     |                                                                     |                                                                                                                                                  |      |                                                                |                                                          |    |                                                        |      |    |    |                                             |                                           |                                                                      |                                                                                |
|-------------------------------------|---------------------------------------------------------------------|--------------------------------------------------------------------------------------------------------------------------------------------------|------|----------------------------------------------------------------|----------------------------------------------------------|----|--------------------------------------------------------|------|----|----|---------------------------------------------|-------------------------------------------|----------------------------------------------------------------------|--------------------------------------------------------------------------------|
| Zuern et al, 2012 <sup>53</sup>     | RVSP > 30 mm Hg                                                     | 200 patients with AS undergoing AVR stratified into NPH (RVSP < 30) vs mild-to-moderate PH (30 < RVSP < 60) and severe PH (> 60 mm Hg)           | 31.2 | 72.3 vs 52.5%                                                  | All cause mortality                                      | NR | 36.3                                                   | 61   | NR | NR | 10.2 vs 14.1 vs 30.4                        | 30.7 vs 40.4 vs 60.1                      | 2.6, 15.2 and 26.1%                                                  | HR for mild to moderate PH 4.9 (1.1-21.8) and severe PH 3.3 (0.6-19.7)         |
| Ben-Dor et al, 2011 <sup>21</sup>   | RVSP > 40 mm Hg                                                     | 509 patients with AS divided into group 1 (RVSP < 40 mm Hg, n = 161); group 2 (RVSP 40-59, n = 175) and group 3 (RVSP > 60 mm Hg, n = 173)       | 6.73 | 82.3 vs 82.4 vs 80.5 in group 1, 2, and 3 respectively, > 75%  | All cause mortality                                      | NR | 33.7 vs 49.3 vs 70.7 in group 1, 2, and 3 respectively | 68.3 | NR | NR | NR                                          | NR                                        | 21.7 vs 39.3 vs 49.1 in group 1, 2, and 3 respectively at median FU* | PH was significantly associated with increase in mortality, OR/HR not reported |
| Yang et al, 2012 <sup>54</sup>      | RVSP > 40 mm Hg                                                     | 845 patients who underwent valve surgery and/or CABG (444 without PH or NPH vs 401 PH), all with LVEF < 40%                                      | 39   | 65.2 vs 67.8 vs 78.8 vs 72.6% in NPH and PH group respectively | Post operative complications and mortality               | NR | NR                                                     | NR   | NR | NR | 4.6 vs 13.9 in NPH vs PH group respectively | NR                                        | 16.7 vs 30.6* in NPH vs PH group respectively                        | OR for mild/moderate PH 1.475 (1.119-1.943)                                    |
| Nozohoor et al, 2012 <sup>55</sup>  | RVSP > 50 mm Hg                                                     | 270 patients with MR undergoing MVS, stratified into NPH group (RVSP < 50 mm Hg) and PH group (RVSP ≥ 50 mm Hg)                                  | 61.2 | 61.5 vs 66.5 vs 70 vs 54% in no PH and PH group respectively   | Perioperative complications and all cause late mortality | NR | NR                                                     | 27   | NR | NR | 7.6 vs 8.2 in no PH and PH respectively     | 22.4 vs 17.6 in no PH and PH respectively | 31.1 in both groups                                                  | HR 4.3 (1.1-17.4) during the initial 3 years after MVS                         |
| Ward and Hancock 1975 <sup>18</sup> | RHC with extreme PH defined as SPAP > 80 mmHg and PVR > 10 Wu: 8.2% | Mitral valve disease (n = 586), 48 extreme PH stratified into group 1 (no operation), group 2 (all surgical) and group 3 (survive after surgery) | 69.6 | 46.2 vs 42.4 vs 43 vs 29% in group 1 and 2 respectively        | All-cause mortality                                      | NA | 105 vs 96.6                                            | 8.2  | NA | NR | NR                                          | NR                                        | NR                                                                   | Extreme PH was associated with higher mortality, and surgery improved survival |

|                                     |                                                                    |                                                                                                                                                                   |          |                                                   |                                              |    |                                             |       |    |    |                                    |                                      |                                      |                                                                                |
|-------------------------------------|--------------------------------------------------------------------|-------------------------------------------------------------------------------------------------------------------------------------------------------------------|----------|---------------------------------------------------|----------------------------------------------|----|---------------------------------------------|-------|----|----|------------------------------------|--------------------------------------|--------------------------------------|--------------------------------------------------------------------------------|
| Ghoreishi et al, 2012 <sup>56</sup> | sPAP>40 mm Hg using RHC in 591 patients and RVSP>40 mm Hg using DE | 873 patients with MR who underwent MVS, stratified into NPH and PH group (mild, moderate, severe) NHYA not reported                                               | 35       | 59<br>59%                                         | Hospital mortality, Late all cause mortality | NR | 46 (echo), and sPAP was 43 by RHC           | 53    | NR | NR | 16.2 in non PH vs 32% in PH group* | 33.9 in non PH vs 48.1% in PH group* | 51.8 in non PH vs 60.9% in PH group* | HR 1.018(1.007-1.028) per each 1 mm Hg increment in RVSP                       |
| Cam A et al, 2011 <sup>22</sup>     | RHC with severe PH defined as mPAP>35 mm Hg                        | 317 patients with AS, 35 with severe PH underwent surgery and were compared to 114 mild moderate PH and to 46 severe PH treated conservatively, NHYA not reported | 11<br>.3 | 71/53.5 (mild-moderate PH) vs 75/51.4 (severe PH) | All cause mortality                          | NA | 22.5 (mild-moderate PH) vs 45.3 (severe PH) | 47.0  | NR | NR | NR                                 | NR                                   | 74.5 vs 75.5                         | HR 1.008 (0.9-1.11) and early post-operative reduction in mPAP 0.93 (1.2-12.5) |
| Pai et al, 2007 <sup>57</sup>       | Severe PH defined as RVSP>60 mm Hg                                 | 116 patients (of 740 severe AS) with severe PH among which 36 underwent AVR and were compare to 83 remaining                                                      | 18       | 75<br>39%                                         | All cause mortality                          | NR | 69 (severe PH)                              | 15.7% | NR | NR | NR                                 | 30.5 (PH) vs 15.5 (NP H)             | NR                                   | AVR benefit HR 0.28 (0.16-0.51) independent of PH.                             |

AS(R): Aortic stenosis(regurgitation); AVS(R): Aortic valve surgery(replacement); CABG: Coronary artery bypass graft; DE(Doppler echocardiography); eSPAP: Estimated systolic pulmonary artery pressure; HFpEF: Heart failure (HF) and preserved ejection fraction; LVEF: Left ventricular (LV) ejection fraction; MBV: Mitral Balloon Valvotomy; mPAP: mean pulmonary arterial pressure; mPCWP: mean pulmonary capillary wedge pressure; MV(R/O): Mitral valve (Repair/Operation); NPH: Non pulmonary hypertension; PH: Pulmonary hypertension; PVR: Pulmonary vascular resistance; RV(SP/TG): Right ventricular systolic pressure/tricuspid gradient); TPG: Transpulmonary gradient; TRV: Tricuspid regurgitation(TR) velocity(TRV); UTSW: University of Texas—Southwestern; WU: Wood units; P<0.05 \*\*

**Table 3: Other prognostic factors associated with mortality in patients with pulmonary hypertension associated with left heart disease**

| Factor                                                           | Number of studies reporting |                     | Number of studies in which the factor was associated with poor outcome |                            |
|------------------------------------------------------------------|-----------------------------|---------------------|------------------------------------------------------------------------|----------------------------|
|                                                                  | overall                     | Studies based on DE | Studies of PH based on DE                                              | Studies of PH based on RHC |
| Age                                                              | 14                          | 11                  | 11                                                                     | 3                          |
| Sex (male vs female)                                             | 11                          | 9                   | 3                                                                      | 0                          |
| Racial / ethnic group                                            | 2                           | 2                   | 0                                                                      | 0                          |
| HF episodes                                                      | 5                           | 5                   | 2                                                                      | 0                          |
| Prior hypertension                                               | 5                           | 5                   | 1                                                                      | 0                          |
| History of diabetes                                              | 8                           | 8                   | 3                                                                      | 0                          |
| Smoking                                                          | 3                           | 3                   | 0                                                                      | 0                          |
| History of cardiovascular disease                                | 1                           | 1                   | 1                                                                      | 0                          |
| Functional class (NYHA/WHO)                                      | 12                          | 9                   | 5                                                                      | 2                          |
| Killip class for MI                                              | 2                           | 2                   | 2                                                                      | 0                          |
| Heart rate                                                       | 2                           | 2                   | 0                                                                      | 0                          |
| Systolic BP                                                      | 4                           | 4                   | 2                                                                      | 0                          |
| Diastolic BP                                                     | 1                           | 1                   | 1                                                                      | 0                          |
| Mean BP                                                          | 1                           | 1                   | 1                                                                      | 0                          |
| SPO2                                                             | 3                           | 3                   | 1                                                                      | 0                          |
| Hypotension                                                      | 1                           | 1                   | 1                                                                      | 0                          |
| Atrial fibrillation                                              | 5                           | 5                   | 5                                                                      | 0                          |
| Ischemic etiology of HF                                          | 4                           | 4                   | 0                                                                      | 0                          |
| Urea                                                             | 2                           | 2                   | 1                                                                      | 0                          |
| Kidney disease (by creatinine, GFR, or hemodialysis)             | 17                          | 14                  | 6                                                                      | 0                          |
| BNP                                                              | 3                           | 3                   | 2                                                                      | 0                          |
| Hemoglobin                                                       | 2                           | 2                   | 0                                                                      | 0                          |
| Presence of COPD                                                 | 4                           | 3                   | 3                                                                      | 0                          |
| Use of medications (ACEI and or beta blockers or spironolactone) | 6                           | 6                   | 3                                                                      | 0                          |
| LVEF                                                             | 10                          | 10                  | 6                                                                      | NA                         |
| LV end diastolic diameter /index                                 | 6                           | 6                   | 3                                                                      | NA                         |
| Atrial diameter                                                  | 1                           | 1                   | 1                                                                      | NA                         |
| Deceleration time                                                | 1                           | 1                   | 0                                                                      | NA                         |
| RV function (by TAPSE or other means)                            | 3                           | 3                   | 3                                                                      | NA                         |
| Functional mitral regurgitation                                  | 5                           | 5                   | 4                                                                      | NA                         |
| RVSP $\geq$ 50 or > 60 mm Hg                                     | 9                           | 9                   | 5                                                                      | NA                         |
| End diastolic pulmonary regurgitation                            | 1                           | 1                   | 1                                                                      | NA                         |

ACEI: Angiotensin converting enzyme inhibitors; BNP: Brain natriuretic peptide; BP: Blood pressure; COPD: Chronic obstructive pulmonary disease; GFR: Glomerular filtration rate; HF: Heart failure; MI: Myocardial infarction; NYHA: New York Heart Association; RVSP: Right ventricular systolic pressure; RV: Right ventricle; TAPSE: Tricuspid annular plan systolic excursion; WHO: World Heart Organization.



1  
2  
3  
4  
5  
6  
7  
8  
9 **Predictors of hospitalizations for heart failure and mortality in patients with pulmonary**  
10 **hypertension associated with left heart disease: A systematic review**  
11

12  
13 **Authors:**

14 Anastase DZUDIE, MD, FESC (1,2), Andre Pascal Kengne, MD, PhD (2,3), Friedrich  
15 Thienemann, MD, PhD (2,4,5) and Karen Sliwa, MD, PhD, FESC, FACC (2,3,6)  
16  
17

18  
19 **Affiliations:**

- 20  
21 (1) Douala General Hospital and Buea Faculty of Health Sciences, Cameroon  
22 (2) Department of Medicine, Faculty of Health Sciences, University of Cape Town, South  
23 Africa  
24 (3) Non-Communicable Diseases Research Unit, South African Medical Research Council,  
25 Cape Town, South Africa  
26 (4) Clinical Infectious Diseases Research Initiative, Institute of Infectious Diseases and  
27 Molecular Medicine, Faculty of Health Sciences, University of Cape Town, Cape Town,  
28 South Africa  
29 (5) Division of Infectious Diseases and HIV Medicine, Department of Medicine, University  
30 of Cape Town, Cape Town, South Africa  
31 (6) Hatter Institute for Cardiovascular Research in Africa, Cape Heart Group, University of  
32 Cape Town, Cape Town, South Africa  
33  
34  
35  
36  
37  
38  
39

40 **Address for Correspondence:**

41  
42 Dr Anastase DZUDIE, MD; FESC. Douala General Hospital; P.O Box 4856, Douala; Cameroon;  
43  
44 Tel: + (237)79617981; Fax: + (237)33370146; E-mail: aitzudie@yahoo.com  
45  
46  
47  
48  
49  
50  
51  
52  
53  
54

**ABSTRACT**

Objectives: Left heart disease (LHD) is the main cause of pulmonary hypertension (PH), but little is known regarding the predictors of adverse outcome of PH associated with LHD (PH-LHD). We conducted a systematic review to investigate the predictors of hospitalizations for heart failure and mortality in patients with PH-LHD.

Design: Systematic review

Data sources: PubMed MEDLINE and SCOPUS from inception to August 2013 were searched, and citations identified via the ISI Web of science.

Study selection: Studies that reported on hospitalization and/or mortality in patients with PH-LHD were included if the age of participants was greater than 18 years and PH was diagnosed using Doppler echocardiography and/or right heart catheterization. Two reviewers independently selected studies, assessed their quality and extracted relevant data.

Results: In all 45 studies (38 from Europe and USA) were included among which 71.1% were of high quality. Thirty-nine studies were published between 2003 and 2013. The number of participants across studies ranged from 46 to 2385; the proportion of men from 21% to 91%; mean/median age from 63 to 82 years; and prevalence of PH from 7 to 83.3%. PH was consistently associated with increased mortality risk in all forms of LHD, except for aortic valve disease where findings were inconsistent. Six of the nine studies with data available on hospitalizations reported a significant adverse effect of PH on hospitalization risk. Other predictors of adverse outcome were very broad and heterogeneous including right ventricular dysfunction, functional class, left ventricular function and presence of kidney disease.

1  
2  
3  
4  
5  
6  
7  
8  
9  
10  
11  
12  
13  
14  
15  
16  
17  
18  
19  
20  
21  
22  
23  
24  
25  
26  
27  
28  
29  
30  
31  
32  
33  
34  
35  
36  
37  
38  
39  
40  
41  
42  
43  
44  
45  
46  
47  
48  
49  
50  
51  
52  
53  
54  
55  
56  
57  
58  
59  
60

Conclusions: PH is almost invariably associated with increased mortality risk in patients with LHD. However, effects on hospitalization risk are yet to be fully characterized; while available evidence on the adverse effects of PH have been derived essentially from Caucasians.

Word count - 289

**Key words:**

Pulmonary hypertension, left heart disease, outcome, mortality, predictors, hospitalization

For peer review only

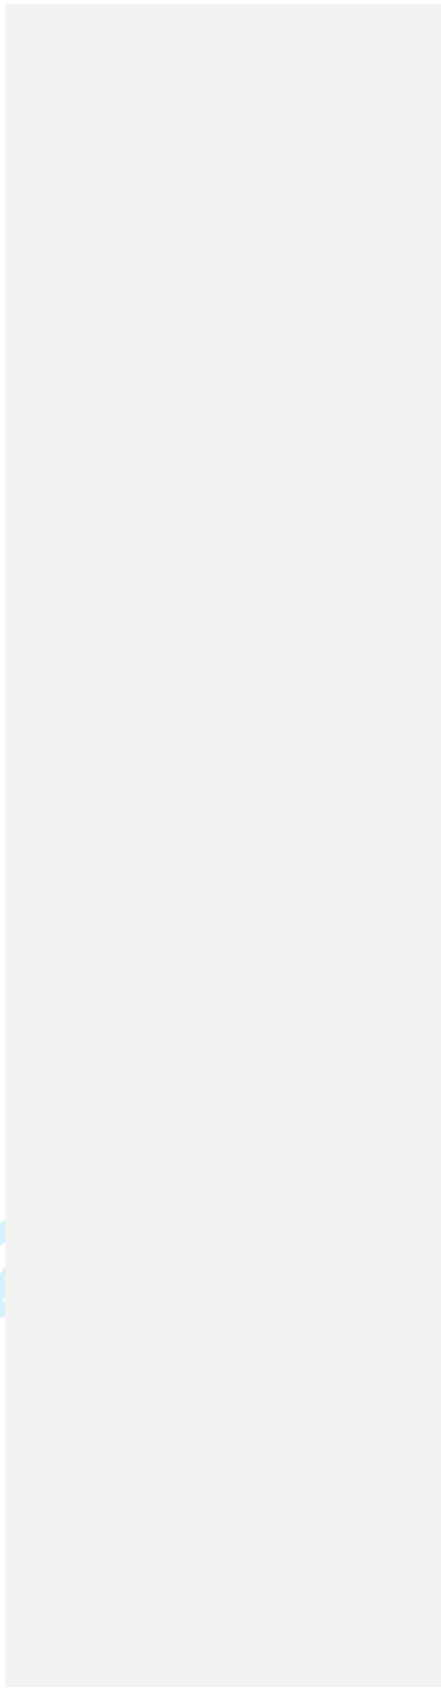

## ARTICLE SUMMARY

### Article focus

A systematic review to identify and synthesize the evidence on predictors of hospitalizations for heart failure (HF) and mortality in patients with pulmonary hypertension due to left heart disease (PH-LHD)

### Key messages

- PH is an independent predictor of mortality in patients with LHD, but the evidence is more consistent in patients with HF and mitral regurgitation.
- Existing evidence on the outcomes of patients with LHD-PH have been derived essentially from studies in Western and developed countries, and may not apply to populations in other settings
- The hypothesis of targeting PH to improve the outcomes of patients with left heart diseases should be actively investigated.

### Strengths and limitations

- Our search strategy was likely limited by its focus on full report published in English and French, and traceable via PubMed MEDLINE and/or SCOPUS

- 1  
2  
3  
4  
5  
6  
7  
8  
9 • Important heterogeneity in the included studies precluded the pooling  
10 of data to perform a metaanalysis.  
11  
12  
13  
14 • This is the first systematic review on determinants of hospitalizations  
15 and mortality in patients with PH-LHD, which presents the available up-to-  
16 date and high quality evidence on the subject matter.  
17  
18  
19  
20  
21  
22  
23  
24  
25  
26  
27  
28  
29  
30  
31  
32  
33  
34  
35  
36  
37  
38  
39  
40  
41  
42  
43  
44  
45  
46  
47  
48  
49  
50  
51  
52  
53  
54  
55  
56  
57  
58  
59  
60
- Important heterogeneity in the included studies precluded the pooling of data to perform a metaanalysis.
  - This is the first systematic review on determinants of hospitalizations and mortality in patients with PH-LHD, which presents the available up-to-date and high quality evidence on the subject matter.

## INTRODUCTION

Pulmonary hypertension (PH) describes a group of disorders resulting from an increase in pulmonary vascular resistance, pulmonary blood flow, pulmonary venous pressure, or a combination of these features.<sup>1</sup> Based on shared pathological, hemodynamic characteristics and therapeutic approaches, five clinical groups of PH have been distinguished,<sup>2</sup> with PH associated with left heart disease (PH-LHD) or PH group 2 credited to be the most frequent form of PH in contemporary clinical settings.<sup>3</sup> Indeed, pulmonary hypertension is common in patients with left heart disease (LHD), where it often reflects the background LHD, but has also been reported to be a maker of disease severity and ~~unfavorable~~unfavourable prognosis. Patients with PH-LHD have more severe symptoms, worse tolerance to effort, experience higher hospitalization rates, and are more likely to receive an indication of the need for cardiac transplant<sup>3</sup> with major implications for the quality of life of patients and healthcare costs. Several studies have reported PH-LHD to be associated with increased mortality, both in patients with systolic dysfunction and those with preserved left ventricular ejection fraction (LVEF).<sup>3-6</sup> Furthermore, the presence of preoperative PH has been associated with poor outcomes in patients with valve disease undergoing valve replacement.<sup>5,7</sup> However, there are still several gaps in the existing evidence, including the prevalence of PH-LHD and measurement of the true impact of PH on symptoms and outcome of various left heart diseases. Equally, little is known regarding the effect of the severity of PH on hospitalizations, re-hospitalization and death, and their co-factors in patients with LHD. Considering the number of recent advances in the management of pulmonary hypertension, it is likely that a better understanding of the impact of PH-LHD on major outcomes might assist the clinical management of patients with pulmonary hypertension.

We performed a systematic review of the existing literature to determine the predictors of hospitalization and mortality in patients with pulmonary hypertension secondary to left heart

Field Code Changed

1  
2  
3  
4  
5  
6  
7  
8  
9 diseases including systolic dysfunction, diastolic dysfunction and/or valve disease. Additionally,  
10 we aimed to assess whether the severity of PH affects the risk of the two outcomes.  
11

## 12 13 14 **METHODS**

15  
16 We searched MEDLINE via PubMed and SCOPUS from inception to August 2013 for all  
17 published studies on PH-LHD, using a combination of key words described in the Online Box 1.  
18 All searches were restricted to studies in humans published in 'English' or 'French' languages. In  
19 addition, we manually searched the reference lists of eligible studies and relevant reviews, and  
20 traced studies that had cited them through the ISI Web of Science for any relevant published and  
21 unpublished data. Two independent reviewers (AD and APK) performed the study selection, data  
22 extraction and quality assessment; and disagreements were resolved by consensus or consulting a  
23 third reviewer (KS).  
24  
25  
26  
27  
28  
29  
30

31 Studies that reported on hospitalization and/or mortality in patients with PH-LHD were included  
32 if the following criteria were met: 1) age of participants greater than 18 years; 2) ~~RVSP~~ (Right  
33 ventricular systolic pressure (RVSP) measured by transthoracic Doppler echocardiography (DE)  
34 and calculated from the maximum tricuspid regurgitation jet velocity using the modified  
35 Bernoulli equation ( $4v^2$ ) and adding right atrial pressure (RAP). RAP could be a fixed value  
36 from 5 mmHg to 10 mmHg, could have been estimated clinically using the jugular venous  
37 pressure (JVP), or estimated by measuring the inferior vena cava size and change with  
38 spontaneous respiration using echocardiography; and/or 3) mean pulmonary artery pressure  
39 (mPAP) measured by right heart catheterization (RHC) or by Doppler echocardiography. We  
40 excluded narrative reviews and case series. Studies on persistent PH following heart  
41 transplantation were not included because of the complexity of the classification of PH in this  
42 population.  
43  
44  
45  
46  
47  
48  
49  
50  
51  
52  
53

1  
2  
3  
4  
5  
6  
7  
8  
9 The following variables were extracted from each study: publication year; country of origin of  
10 the study, study design, study population's demographics, the mean/median follow-up duration,  
11 the outcome predicted, the proportion of measurable RVSP, the mean/median baseline RVSP or  
12 mPAP, the prevalence of PH, the readmission rate, the mortality rate with odds ratio (OR) or  
13 hazards ratio (HR) for PH where reported, and the predictors of outcome including the tricuspid  
14 annular plan systolic excursion (TAPSE). One study<sup>8</sup> reported the effect of PH in relation with  
15 survival. Effects on mortality were obtained by taking the inverse of the HR for survival.  
16  
17  
18  
19  
20  
21

### 22 **Quality assessment**

23  
24 The methodological quality of the selected studies was assessed using the Quality In Prognosis  
25 Studies (QUIPS) tool, designed for systematic reviews of prognostic studies through an  
26 international expert consensus (Table 1~~Table 1~~)<sup>9</sup>. The QUIPS contains six domains assessing the  
27 following: (1) bias due to patient selection, (2) attrition, (3) measurement of prognostic factors,  
28 (4) outcome measurement, (5) confounding on statistical analysis and reporting results (6)  
29 confounding on presentation. In prognosis studies designed to predict a specific outcome based  
30 on a combination of several possible prognostic factors, confounding is not an issue. Therefore  
31 the items on confounding were considered irrelevant for our quality assessment. The remaining  
32 17 items of the five categories each were scored to assess the quality of the included studies. For  
33 each study, the five domains were scored separately as high (+), moderate (+/-) or low (-) quality  
34 (i.e. presenting a low, moderate, or high risk of bias, respectively). To strengthen the  
35 discriminative capacity of the QUIPS, we used the scoring algorithm developed by de Jonge et al  
36  
37  
38  
39  
40  
41  
42  
43  
44  
45  
46  
47  
48  
49  
50  
51  
52  
53  
54  
55  
56  
57  
58  
59  
60

### 54 **Data synthesis**

55  
56  
57  
58  
59  
60  
Hospitalizations or re-hospitalizations for heart failure and mortality identified by multivariable  
analysis in individual studies are presented (Table 2), including their estimated effect size (e.g.



odds or hazard ratio) and 95% confidence interval (CI). Quantitative analysis of results was not done due to important heterogeneity in study design, study population, PH definition and measurement, outcome definitions in the studies, and confounding or other type of prognostic factors. We have therefore presented a narrative summary of the available evidence ([Table 2](#)).

## RESULTS

### Studies selection

Figure 1 presents a flow diagram for the study selection process. Of the 7550 citations identified through searches, 6255 titles were examined and 6083 were excluded on the basis of the title scanning. The remaining 172 abstracts were examined and 55 articles were screened by full text of which 15 were excluded for various reasons (Figure 1). Five studies were identified via citation search. Therefore, 45 articles were included in the final review among which 86.7% were published between 2003 and 2013 (Online Figure 12).

### Study characteristics and methodological quality

The characteristics and methodological quality of the 45 included studies are described in [Table 1](#) and [Table 2](#). The overall quality score ranged from 29.5 to 72.5 points with a median of 63.5. Based on the cutoffs of  $\geq 60$  and  $\geq 45$  points, respectively, we classified 34 articles as being of high quality, 7 as moderate-to-high quality and four as low quality studies ([Table 1](#)). Studies of high quality were recent and scored well on patient selection, outcome measurement, statistical analysis and presentation. Studies classified as moderate/low quality scored relatively well on patient selection, but poorly on study attrition, statistical analysis and presentation. Twenty four (53.3%) studies were from USA, twelve (26.6%) from Europe (four from UK, three from Italy, and one from Spain, Germany, Denmark, France, Sweden), six (13.3%) from Asia (two from Japan, one from India, China, Korea and Australia) and one from South Africa. One study was multicentric

across Europe and USA<sup>11</sup> and another one was multicentric across USA and Canada<sup>12</sup>. Only three population based cohorts were reported including two prospective<sup>13,14</sup> and one retrospective studies<sup>15</sup>. For the remaining 42 hospital-based cohort studies, 20 had a retrospective design. The number of participants ranged from 46 to 2385 in hospital-based and from 244 to 1049 in population-based studies. The proportion of men ranged from 21% to 91%, and mean/median age from 63 to 82 years. Twenty six studies were in patients with heart failure (HF) and cardiomyopathies (two in heart failure with preserved ejection fraction [HFpEF]) and nineteen in patients with valve disease.

Twelve studies defined PH using right heart catheterization (RHC) and 32 studies using ~~Doppler echocardiography~~(DE). One study defined PH using both RHC and DE. Studies applied variable definitions of PH using both RHC ([based on mPAP >25 or 30 mm Hg, or on systolic pulmonary artery pressure (sPAP) >50 mm Hg, or sPAP >40 mm Hg, or on pulmonary vascular resistance (PVR) >2.5 wood units (WU)] and Doppler echocardiography ([based on RVSP with cutoffs varying from 35 to 50 mm Hg or based on a mPAP >25 mm Hg<sup>8</sup>, or on a right ventricular tricuspid gradient (RV TG) >25 mm Hg<sup>16</sup>]. Prevalence of PH in HF ranged from 22 to 83.3% overall, 22 to 83.3% in studies of PH based on DE and 23 to 76% in studies of PH based on RHC.

## Outcome of pulmonary hypertension

### Admissions for heart failure

The duration of follow-up ranged from six to 87.6 months overall, 6 to 69.6 months in studies of PH based of RHC definition, and 6 to 87.6 months in studies of PH based on DE definition. Readmission rates, when reported ranged from 9.2 to 75% overall, 9.2 to 75% in studies of PH based on DE definition. Only one study with PH definition based on RHC reported a readmission

Field Code Changed

1  
2  
3  
4  
5  
6  
7  
8  
9 rate of 27%. (Table 2). Admissions or readmissions for HF was reported in 9 studies all based on  
10 DE definition among which 7 reported hazard ratios or odd ratios for admission/readmission in  
11 relation with PH. Effect estimates for 6 out of the 7 studies were statistically significant.

### 14 Mortality

16 Mortality was reported in all studies (Table 2); however, not all of them provided multivariable  
17 adjusted effect estimates of mortality risk associated with PH. PH was associated with increased  
18 all-cause mortality in 24 out of 26 studies of HF among which 6 studies of PH based on RHC  
19 definition, while two studies failed to report an association between PH and all-cause mortality at  
20 6 months. ~~One~~ of these two studies, one used PH definition based on RHC, it which was a  
21 multicentric trial of HF that reported an effect estimates for mortality risk from PH [HR  
22 0.89(95% CI: 0.66-1.20)]<sup>12</sup>, while the other one<sup>17</sup> didn't. When reported, mortality rates at 12  
23 months ranged from 0 to 32% overall, 0 to 32% in studies of PH based on DE and 2.9 to 18% in  
24 studies of PH based on RHC (Online Figure 3). As summarized in Table 3, over 35 potential  
25 predictors of mortality were tested across studies with variable and often inconsistent effects on  
26 the outcome of interest. Age was associated with mortality in 14 studies (among which 11 studies  
27 of PH based on DE), male gender in 3/11 studies (all based on DE), left ventricular ejection  
28 fraction (LVEF) in 6/10 studies, right ventricular (RV) function in 3/3 studies and renal disease  
29 (rising creatinine, decreasing glomerular filtration rate (GFR) or dialysis) in 6/17 studies (all  
30 based on DE), functional class [New York Heart Association (NYHA) or World Heart  
31 Organization (WHO)] in 7/12 studies (five based on DE) while the six minutes walking distance  
32 was tested in only one study but was not integrated in the multivariable analysis for outcome risk

33  
34  
35  
36  
37  
38  
39  
40  
41  
42  
43  
44  
45  
46  
47  
48 <sup>17</sup>

### 52 DISCUSSION

1  
2  
3  
4  
5  
6  
7  
8  
9 An increasing number of studies have assessed the risk of readmission and mortality in patients  
10 with LHD related PH over the last decade, and mostly in North America and Europe. Available  
11 studies are mostly consistent on the adverse effect of PH (whether assessed using DE or RHC)  
12 on mortality risk in patients with heart failure as well as those with mitral valve disease, but less  
13 unanimous in those with aortic valve disease. The consistent adverse effect of PH in this  
14 population highlights the importance of early diagnosis of PH to reduce mortality. While  
15 available studies have been overall of acceptable quality, substantial heterogeneity in the study  
16 population, PH definition and measurement, outcome definitions as well as other prognostic  
17 factors limits direct comparisons across studies. Information on readmission for heart failure was  
18 limited and the assessment of other prognostic factors in an integrated multivariable model was  
19 very heterogeneous.  
20  
21  
22  
23  
24  
25  
26  
27  
28

29 ***Mortality in patients with pulmonary hypertension and heart failure with reduced ejection***  
30 ***fraction***  
31

32 While PH was an independent prognostic factor for mortality in fatal-outcome studies, the  
33 prevalence of PH and effects on mortality varied according to LVEF. Differences in the  
34 prevalence of PH could be explained at least in part by population heterogeneity (age, level of  
35 HF, HF centers or community study) and differences in the criteria used to define PH across  
36 studies with a variety of cutoff values. Regardless of the prevalence of PH in HFrEF, there seems  
37 to be no significant association between the magnitude of reduction in LVEF, the presence or  
38 absence of PH and the effects of PH on mortality risk. It is possible that the small size of studies  
39 and the short duration of follow-up precluded the accumulation of substantial number of events to  
40 allow the detection of a relationship if any. Furthermore, although the precise hemodynamic  
41 threshold beyond which RVSP is invariably associated with mortality is subject to debate; the  
42 risk of death associated with PH seems to ~~increase be higher~~ with ~~higher increase~~ RVSP (9, 14). A  
43  
44  
45  
46  
47  
48  
49  
50  
51  
52  
53

1  
2  
3  
4  
5  
6  
7  
8  
9 possible pathophysiologic explanation is that early and higher vascular remodeling occurs in  
10 patients with HF and severe PH, causing a reactive or “post capillary PH with a pre-capillary  
11 component”, which in turn has a greater impact on the RV function. ~~This of course is consistent  
12 with late diagnosis in heart valve disease, especially rheumatic heart disease (RHD) presenting  
13 with HF.~~ Equally, RV systolic function has been shown to be highly influenced by pressure  
14 overload and by vascular resistance in the pulmonary region (52); and RV function assessed  
15 using right heart catheterization or echocardiography has been shown to be associated with  
16 mortality (20, 32, 33). It is however remarkable that one study (32) reported no interaction  
17 between PH and RV function, with both variables being independently associated with mortality.  
18 This highlights the fact that RV function in HF does not only depend on pulmonary pressure but  
19 may also reflect intrinsic myocardial disease. As suggested by Vachieri et al.<sup>6</sup>, there might be a  
20 spectrum of clinical phenotypes of RV failing in PH-LHD that might evolve from one to the  
21 other, from isolated post-capillary PH with little effect on the RV to more advanced disease  
22 where the failing RV is the key determinant of outcome.

23  
24  
25  
26  
27  
28  
29  
30  
31  
32  
33  
34  
35 *Mortality in patients with pulmonary hypertension and heart failure with preserved ejection*  
36 *fraction*

37  
38  
39 Over the last decades, the increasing prevalence of HFpEF (53) has been paralleled by an  
40 increasing presence of PH in patients with HFpEF (10). When compare to heart failure with  
41 reduced ejection fraction (HFrEF), patients with HFpEF have their subset of risks factors but  
42 finally, PH convey similar morbidity and mortality risk in the two subgroups of patients (10, 15,  
43 19). The current incomplete understanding of HFpEF limits our ability to explain why these  
44 patients develop PH. However, it is estimated that over time left atrium and ventricular filling  
45 pressure from compromised left ventricle and in some, left atrium relaxation and distensibility  
46 can lead to elevated pulmonary venous pressure, triggering vasoconstriction and arterial  
47  
48  
49  
50  
51  
52  
53

1  
2  
3  
4  
5  
6  
7  
8  
9 remodeling (2). In total, the finding of PH as an independent prognostic factor for mortality in  
10 patients with HF tends to support the suggestion that PH should be considered as a potential  
11 therapeutic target at least in the group patients with HF who exhibit persisting PH after  
12 optimization of HF therapy. In this line, targeting both pulmonary vasculature and the heart  
13 would probably be more beneficial.  
14  
15  
16  
17

### 18 *Mortality in patients with PH related to valvular heart disease*

19  
20 PH due to valvular heart disease (VHD) was not always related to mortality risk (34, 35, 40, 41,  
21 47), which is in contrast with PH in patients with heart failure. A simple explanation of this  
22 difference could be that the prevalence and severity of PH correlates with the severity and type of  
23 VHD. Though mitral stenosis (MS) has been the classical disease associated with PH-LHD and  
24 reactive PH was initially described in these patients,<sup>4</sup> it is however noticeable that PH due to MS  
25 has received little attention over the last decade, probably because of the progressive decline in  
26 RHD in western countries. Interestingly, the two studies included showed that surgery was safe  
27 and improved survival in patients with PH due to MS,<sup>18,19</sup> with PH regressing to normal levels  
28 over 6-12 months after successful Mitral Balloon Valvotomy (MBV).<sup>19</sup> In mitral regurgitation  
29 (MR), nearly all cohort studies on outcomes of severe PH reported increase mortality (3, 7, 38,  
30 39, 42, 48). The relevance of this finding is that PH can serve both as an indication for  
31 proceeding to surgical or catheter-based interventions, and also as an operative risk factor for  
32 mitral valve interventions.<sup>20</sup> By contrast, PH is not as common in the aortic valve surgical  
33 cohort. Mortality rates in different studies of patients with VHD depends on comorbidities,  
34 exclusion criteria, and definition for PH. Studies that also evaluated changes in PH following  
35 valve surgery showed a decline in pulmonary pressures following surgery.<sup>19, 21-23</sup> It is worth  
36 noting that the pathophysiology of the pulmonary vasculature in PH due to VHD is similar to that  
37 in patients with HF.<sup>(1)</sup>  
38  
39  
40  
41  
42  
43  
44  
45  
46  
47  
48  
49  
50  
51  
52  
53  
54  
55  
56  
57  
58  
59  
60

Field Code Changed

### Hospitalizations and other prognostic factors

The paucity of information on the effect of PH-LHD on hospitalizations or re-hospitalizations as showed in this study highlights the need for more evidence on this outcome. Such information is important to fully characterize and quantify the contribution of PH-LHD to the global burden of disease, and assess future improvement from treating the underlying LHD and or controlling PH in patients with LHD.

Of the 35 other potential prognostic factors of mortality in patients with PH that were tested in multivariable models across studies, investigations on echocardiographic parameters suggested that PH>60 mm Hg was associated with worse mortality in 7 out of 9 studies. Similarly, a greater degree of MR, deceleration time when reported (28) and RV function were almost constantly associated with adverse outcome while LVEF was associated with adverse outcome in 6 of 10 studies. In the evolution of LHD, RV dysfunction usually occurs as a turning point. It shall be noted that PH incorporates information on diastolic function, MR and pulmonary vascular disease, and this might explain the pivotal role of PH in gauging the prognosis of patients with HF.

### *Strengths and limitations of the studies included in the review*

The first limitation of the studies included in our review is the possibility of study population bias. The majority of studies originated from Western countries and included predominantly Caucasians and reported mostly on PH-LHD in a population with high prevalence of ischemic heart disease. This precludes the generalizability of our findings to developing countries where etiologies of left heart diseases are less of ischemic origin and are more dominated by systemic hypertension, dilated cardiomyopathies and RHD in a younger population.<sup>24</sup> Therefore PH-LHD

may have a different prognosis in developing countries. Secondly, studies included in this review defined PH based either on DE or RHC. RHC remains the gold standard to diagnose and confirm

Field Code Changed

PH, but performing RHC on all patients with dyspnoea would bear excessive risks and be impractical in resource-limited settings. DE on the other hand is a widely available, safe, and relatively cheap for diagnosing PH, although the reproducibility of the approach in some circumstances has been questioned. However, a systematic review on the diagnostic accuracy of DE in PH by Janda et al<sup>25</sup> has shown that the correlation of pulmonary artery systolic pressure by DE compared to RHC was good with a pooled correlation coefficient of 0.70 (95% CI 0.67 to 0.73). However, studies to date examining the prognostic impact of PH in LHD have been performed in heterogeneous populations, using variable definitions of PH based ~~multiplicity of PH definitions based~~ both on RHC and echocardiography parameters, thus limiting any possibility of pooling. Finally, readmissions were not frequently reported and multivariable analysis when performed was characterized by a great heterogeneity in the number and range of candidate predictors included in the models, thus limiting interpretation and generalizability. Therefore, findings on these other prognostic factors must be interpreted with caution. For studies that performed only univariate analysis, we cannot rule out the possibility that the reported factors may not preserve a significant association with the outcome once adjusted for the effect of other extraneous factors. In spite of these limitations, the majority of studies included were recent and all reported on the relation of PH-LHD with all-cause mortality, making the conclusions on this relation appropriate for contemporary Western populations.

#### ***Strengths and limitations of the review***

First, by restricting our search strategy to full report articles published in English and French, and in journals available in the used electronic databases, we cannot rule out the possibility of language or publication bias. Secondly, we used the QUIPS instrument, designed for prognosis studies to address common sources of bias. The QUIPS, however, lacks discriminative power, henceforth we addressed this by using of the scoring algorithm suggested by de Jonge et al (6).



1  
2  
3  
4  
5  
6  
7  
8  
9 This scoring algorithm can still be subject to criticisms, especially because the cutoff points used  
10 to determine the quality of the studies are quite arbitrary. Thirdly, because of important  
11 heterogeneity in studies included, we were not able to pool data to perform a metaanalysis or to  
12 stratify data by clinically important subgroups (such as mild, moderate, or severe PH). However,  
13 to our knowledge, this is the first systematic review on determinants of hospitalizations and  
14 mortality in patients with PH-LHD and the search strategy used allowed us to present in large the  
15 results of more recent and high quality publications on the topic.  
16  
17  
18  
19  
20  
21  
22  
23

## 24 CONCLUSION

25 The majority of studies included in this review showed that PH is an independent predictor of  
26 mortality in patients with LHD, with the more consistent evidence being in those with HF and  
27 MR. Information on readmission for heart failure was somehow very limited. The majority of this  
28 information derives from studies in Western and developed countries, and may not apply to  
29 populations in other settings. All together, these findings suggest that the hypothesis of targeting  
30 PH to improve the outcomes of patients with left heart diseases should be actively investigated.  
31  
32  
33  
34  
35  
36  
37  
38  
39  
40  
41  
42  
43  
44  
45  
46  
47  
48  
49  
50  
51  
52  
53  
54  
55  
56  
57  
58  
59  
60

**Authors 'contribution statement**

Conceived and designed the protocol: AD and APK. Performed the literature search, selection and quality assessment of the articles and extraction of data: AD, APK and KS. Interpreted the data: AD, APK, FT and KS. Wrote the first draft of the manuscript: AD. Contributed to the writing of the manuscript: AD, APK, KS and FT. Agree with manuscript results and conclusions: AD, APK, FT and KS. All authors read and approved the final manuscript.

**Declaration of competing interest**

None for all co-authors

**Funding**

This project did not receive any funds

**Data sharing**

No additional data available

## References

1. Fang JC, DeMarco T, Givertz MM, Borlaug BA, Lewis GD, Rame JE, et al. World Health Organization Pulmonary Hypertension group 2: pulmonary hypertension due to left heart disease in the adult--a summary statement from the Pulmonary Hypertension Council of the International Society for Heart and Lung Transplantation. *J Heart Lung Transplant* 2012;31(9):913-33.
2. Simonneau G, Gatzoulis MA, Adatia I, Celermajer D, Denton C, Ghofrani A, et al. Updated clinical classification of pulmonary hypertension. *Journal of the American College of Cardiology* 2013;62(25 Suppl):D34-41.
3. Guazzi M, Borlaug BA. Pulmonary hypertension due to left heart disease. *Circulation* 2012;126(8):975-90.
4. Haddad F, Kudelko K, Mercier O, Vrtovec B, Zamanian RT, de Jesus Perez V. Pulmonary hypertension associated with left heart disease: characteristics, emerging concepts, and treatment strategies. *Prog Cardiovasc Dis* 2011;54(2):154-67.
5. Segers VF, Brutsaert DL, De Keulenaer GW. Pulmonary hypertension and right heart failure in heart failure with preserved left ventricular ejection fraction: pathophysiology and natural history. *Curr Opin Cardiol* 2012;27(3):273-80.
6. Vachiery JL, Adir Y, Barbera JA, Champion H, Coghlan JG, Cottin V, et al. Pulmonary hypertension due to left heart diseases. *J Am Coll Cardiol* 2013;62(25 Suppl):D100-8.
7. Parker MW, Mittleman MA, Waksmonski CA, Sanders G, Riley MF, Douglas PS, et al. Pulmonary hypertension and long-term mortality in aortic and mitral regurgitation. *Am J Med* 2010;123(11):1043-8.
8. Adhyapak SM. Effect of right ventricular function and pulmonary pressures on heart failure prognosis. *Prev Cardiol* 2010;13(2):72-7.
9. Hayden JA, Cote P, Bombardier C. Evaluation of the quality of prognosis studies in systematic reviews. *Ann Intern Med* 2006;144(6):427-37.
10. de Jonge RC, van Furth AM, Wassenaar M, Gemke RJ, Terwee CB. Predicting sequelae and death after bacterial meningitis in childhood: a systematic review of prognostic studies. *BMC Infect Dis* 2010;10:232.
11. Barbieri A, Bursi F, Grigioni F, Tribouilloy C, Avierinos JF, Michelena HI, et al. Prognostic and therapeutic implications of pulmonary hypertension complicating degenerative mitral regurgitation due to flail leaflet: a multicenter long-term international study. *Eur Heart J* 2011;32(6):751-9.
12. Khush KK, Tasissa G, Butler J, McGlothlin D, De Marco T. Effect of pulmonary hypertension on clinical outcomes in advanced heart failure: Analysis of the Evaluation Study of Congestive Heart

Field Code Changed

Formatted: English (U.S.)

Formatted: English (U.S.)

- 1  
2  
3  
4  
5  
6  
7  
8  
9  
10  
11  
12  
13  
14  
15  
16  
17  
18  
19  
20  
21  
22  
23  
24  
25  
26  
27  
28  
29  
30  
31  
32  
33  
34  
35  
36  
37  
38  
39  
40  
41  
42  
43  
44  
45  
46  
47  
48  
49  
50  
51  
52  
53  
54  
55  
56  
57  
58  
59  
60
- Failure and Pulmonary Artery Catheterization Effectiveness (ESCAPE) database. *American Heart Journal* 2009;157(6):1026-34.
13. Bursi F, McNallan SM, Redfield MM, Nkomo VT, Lam CSP, Weston SA, et al. Pulmonary Pressures and Death in Heart Failure A Community Study. *Journal of the American College of Cardiology* 2012;59(3):222-31.
14. Lam CSP, Roger VL, Rodeheffer RJ, Borlaug BA, Enders FT, Redfield MM. Pulmonary Hypertension in Heart Failure With Preserved Ejection Fraction: A Community-Based Study. *Journal of the American College of Cardiology* 2009;53(13):1119-26.
15. Strange G, Playford D, Stewart S, Deague JA, Nelson H, Kent A, et al. Pulmonary hypertension: prevalence and mortality in the Armadale echocardiography cohort. *Heart* 2012;98(24):1805-11.
16. Damy T, Goode KM, Kallvikbacka-Bennett A, Lewinter C, Hobkirk J, Nikitin NP, et al. Determinants and prognostic value of pulmonary arterial pressure in patients with chronic heart failure. *Eur Heart J* 2010;31(18):2280-90.
17. Wang D, Han Y, Zang H, Yu H, Wang S, Wang Z, et al. Prognostic effects of pulmonary hypertension in patients undergoing cardiac resynchronization therapy. *Journal of Thoracic Disease* 2010;2(2):71-75.
18. Ward C, Hancock BW. Extreme pulmonary hypertension caused by mitral valve disease. Natural history and results of surgery. *Br Heart J* 1975;37(1):74-8.
19. Fawzy ME, Hassan W, Stefadouros M, Moursi M, El Shaer F, Chaudhary MA. Prevalence and fate of severe pulmonary hypertension in 559 consecutive patients with severe rheumatic mitral stenosis undergoing mitral balloon valvotomy. *J Heart Valve Dis* 2004;13(6):942-7; discussion 47-8.
20. Vahanian A, Alfieri O, Andreotti F, Antunes MJ, Baron-Esquivias G, Baumgartner H, et al. [Guidelines on the management of valvular heart disease (version 2012). The Joint Task Force on the Management of Valvular Heart Disease of the European Society of Cardiology (ESC) and the European Association for Cardio-Thoracic Surgery (EACTS)]. *G Ital Cardiol (Rome)* 2013;14(3):167-214.
21. Ben-Dor I, Goldstein SA, Pichard AD, Satler LF, Maluenda G, Li Y, et al. Clinical profile, prognostic implication, and response to treatment of pulmonary hypertension in patients with severe aortic stenosis. *Am J Cardiol* 2011;107(7):1046-51.
22. Cam A, Goel SS, Agarwal S, Menon V, Svensson LG, Tuzcu EM, et al. Prognostic implications of pulmonary hypertension in patients with severe aortic stenosis. *J Thorac Cardiovasc Surg* 2011;142(4):800-8.

1  
2  
3  
4  
5  
6  
7  
8  
9  
10  
11  
12  
13  
14  
15  
16  
17  
18  
19  
20  
21  
22  
23  
24  
25  
26  
27  
28  
29  
30  
31  
32  
33  
34  
35  
36  
37  
38  
39  
40  
41  
42  
43  
44  
45  
46  
47  
48  
49  
50  
51  
52  
53  
54  
55  
56  
57  
58  
59  
60

23. Goldstone AB, Chikwe J, Pinney SP, Anyanwu AC, Funt SA, Polanco A, et al. Incidence, epidemiology, and prognosis of residual pulmonary hypertension after mitral valve repair for degenerative mitral regurgitation. *Am J Cardiol* 2011;107(5):755-60.
24. Damasceno A, Mayosi BM, Sani M, Ogah OS, Mondo C, Ojji D, et al. The causes, treatment, and outcome of acute heart failure in 1006 Africans from 9 countries. *Arch Intern Med* 2012;172(18):1386-94.
25. Janda S, Shahidi N, Gin K, Swiston J. Diagnostic accuracy of echocardiography for pulmonary hypertension: a systematic review and meta-analysis. *Heart* 2011;97(8):612-22.
26. Merlos P, Nunez J, Sanchis J, Minana G, Palau P, Bodi V, et al. Echocardiographic estimation of pulmonary arterial systolic pressure in acute heart failure. Prognostic implications. *Eur J Intern Med* 2013;24(6):562-7.
27. Agarwal R, Shah SJ, Foreman AJ, Glassner C, Bartolome SD, Safdar Z, et al. Risk assessment in pulmonary hypertension associated with heart failure and preserved ejection fraction. *J Heart Lung Transplant* 2012;31(5):467-77.
28. Agarwal R. Prevalence, determinants and prognosis of pulmonary hypertension among hemodialysis patients. *Nephrol Dial Transplant* 2012;27(10):3908-14.
29. Aronson D, Eitan A, Dragu R, Burger AJ. Relationship between reactive pulmonary hypertension and mortality in patients with acute decompensated heart failure. *Circ Heart Fail* 2011;4(5):644-50.
30. Mutlak D, Aronson D, Carasso S, Lessick J, Reisner SA, Agmon Y. Frequency, determinants and outcome of pulmonary hypertension in patients with aortic valve stenosis. *Am J Med Sci* 2012;343(5):397-401.
31. Tatebe S, Fukumoto Y, Sugimura K, Miyamichi-Yamamoto S, Aoki T, Miura Y, et al. Clinical significance of reactive post-capillary pulmonary hypertension in patients with left heart disease. *Circ J* 2012;76(5):1235-44.
32. Stern J, Heist EK, Murray L, Alabiad C, Chung J, Picard MH, et al. Elevated estimated pulmonary artery systolic pressure is associated with an adverse clinical outcome in patients receiving cardiac resynchronization therapy. *Pacing Clin Electrophysiol* 2007;30(5):603-7.
33. Lee WT, Peacock AJ, Johnson MK. The role of per cent predicted 6-min walk distance in pulmonary arterial hypertension. *Eur Respir J* 2010;36(6):1294-301.
34. Moller JE, Hillis GS, Oh JK, Pellikka PA. Prognostic importance of secondary pulmonary hypertension after acute myocardial infarction. *Am J Cardiol* 2005;96(2):199-203.
35. Cappola TP, Felker GM, Kao WH, Hare JM, Baughman KL, Kasper EK. Pulmonary hypertension and risk of death in cardiomyopathy: patients with myocarditis are at higher risk. *Circulation* 2002;105(14):1663-8.

Formatted: English (U.S.)

Formatted: English (U.S.)

- 1  
2  
3  
4  
5  
6  
7  
8  
9  
10  
11  
12  
13  
14  
15  
16  
17  
18  
19  
20  
21  
22  
23  
24  
25  
26  
27  
28  
29  
30  
31  
32  
33  
34  
35  
36  
37  
38  
39  
40  
41  
42  
43  
44  
45  
46  
47  
48  
49  
50  
51  
52  
53  
54  
55  
56  
57  
58  
59  
60
36. Szwejkowski BR, Elder DH, Shearer F, Jack D, Choy AM, Pringle SD, et al. Pulmonary hypertension predicts all-cause mortality in patients with heart failure: a retrospective cohort study. *Eur J Heart Fail* 2012;14(2):162-7.
  37. Abramson SV, Burke JF, Kelly JJ, Jr., Kitchen JG, 3rd, Dougherty MJ, Yih DF, et al. Pulmonary hypertension predicts mortality and morbidity in patients with dilated cardiomyopathy. *Ann Intern Med* 1992;116(11):888-95.
  38. Kjaergaard J, Akkan D, Iversen KK, Kjoller E, Kober L, Torp-Pedersen C, et al. Prognostic importance of pulmonary hypertension in patients with heart failure. *Am J Cardiol* 2007;99(8):1146-50.
  39. Shalaby A, Voigt A, El-Saed A, Saba S. Usefulness of Pulmonary Artery Pressure by Echocardiography to Predict Outcome in Patients Receiving Cardiac Resynchronization Therapy Heart Failure. *The American Journal of Cardiology* 2008;101(2):238-41.
  40. Ristow B, Ali S, Ren X, Whooley MA, Schiller NB. Elevated pulmonary artery pressure by Doppler echocardiography predicts hospitalization for heart failure and mortality in ambulatory stable coronary artery disease: the Heart and Soul Study. *J Am Coll Cardiol* 2007;49(1):43-9.
  41. Grigioni F, Potena L, Galie N, Fallani F, Bigliardi M, Coccolo F, et al. Prognostic implications of serial assessments of pulmonary hypertension in severe chronic heart failure. *J Heart Lung Transplant* 2006;25(10):1241-6.
  42. Levine TB, Levine AB, Goldberg D, Narins B, Goldstein S, Lesch M. Impact of medical therapy on pulmonary hypertension in patients with congestive heart failure awaiting cardiac transplantation. *Am J Cardiol* 1996;78(4):440-3.
  43. Ghio S, Gavazzi A, Campana C, Inserra C, Klersy C, Sebastiani R, et al. Independent and additive prognostic value of right ventricular systolic function and pulmonary artery pressure in patients with chronic heart failure. *Journal of the American College of Cardiology* 2001;37(1):183-88.
  44. Ghio S, Temporelli PL, Klersy C, Simioniu A, Girardi B, Scelsi L, et al. Prognostic relevance of a non-invasive evaluation of right ventricular function and pulmonary artery pressure in patients with chronic heart failure. *European Journal of Heart Failure* 2013;15(4):408-14.
  45. Naidoo DP, Mitha AS, Vythilingum S, Chetty S. Pulmonary hypertension in aortic regurgitation: early surgical outcome. *Q J Med* 1991;80(291):589-95.
  46. Roselli EE, Abdel Azim A, Houghtaling PL, Jaber WA, Blackstone EH. Pulmonary hypertension is associated with worse early and late outcomes after aortic valve replacement: implications for transcatheter aortic valve replacement. *J Thorac Cardiovasc Surg* 2012;144(5):1067-74 e2.

1  
2  
3  
4  
5  
6  
7  
8  
9  
10  
11  
12  
13  
14  
15  
16  
17  
18  
19  
20  
21  
22  
23  
24  
25  
26  
27  
28  
29  
30  
31  
32  
33  
34  
35  
36  
37  
38  
39  
40  
41  
42  
43  
44  
45  
46  
47  
48  
49  
50  
51  
52  
53  
54  
55  
56  
57  
58  
59  
60

47. Melby SJ, Moon MR, Lindman BR, Bailey MS, Hill LL, Damiano RJ, Jr. Impact of pulmonary hypertension on outcomes after aortic valve replacement for aortic valve stenosis. *J Thorac Cardiovasc Surg* 2011;141(6):1424-30.
48. Le Tourneau T, Richardson M, Juthier F, Modine T, Fayad G, Polge AS, et al. Echocardiography predictors and prognostic value of pulmonary artery systolic pressure in chronic organic mitral regurgitation. *Heart* 2010;96(16):1311-7.
49. Kainuma S, Taniguchi K, Toda K, Funatsu T, Kondoh H, Nishino M, et al. Pulmonary hypertension predicts adverse cardiac events after restrictive mitral annuloplasty for severe functional mitral regurgitation. *J Thorac Cardiovasc Surg* 2011;142(4):783-92.
50. Manners JM, Monro JL, Ross JK. Pulmonary hypertension in mitral valve disease: 56 surgical patients reviewed. *Thorax* 1977;32(6):691-6.
51. Malouf JF, Enriquez-Sarano M, Pellikka PA, Oh JK, Bailey KR, Chandrasekaran K, et al. Severe pulmonary hypertension in patients with severe aortic valve stenosis: clinical profile and prognostic implications. *J Am Coll Cardiol* 2002;40(4):789-95.
52. Khandhar S, Varadarajan P, Turk R, Sampat U, Patel R, Kamath A, et al. Survival benefit of aortic valve replacement in patients with severe aortic regurgitation and pulmonary hypertension. *Ann Thorac Surg* 2009;88(3):752-6.
53. Zuern CS, Eick C, Rizas K, Stoleriu C, Woernle B, Wildhirt S, et al. Prognostic value of mild-to-moderate pulmonary hypertension in patients with severe aortic valve stenosis undergoing aortic valve replacement. *Clin Res Cardiol* 2012;101(2):81-8.
54. Yang C, Li D, Mennett R, Hammond J, Zhang G, Chen D, et al. The impact of pulmonary hypertension on outcomes of patients with low left ventricular ejection fraction: a propensity analysis. *J Heart Valve Dis* 2012;21(6):767-73.
55. Nozohoor S, Hyllen S, Meurling C, Wierup P, Sjogren J. Prognostic value of pulmonary hypertension in patients undergoing surgery for degenerative mitral valve disease with leaflet prolapse. *J Card Surg* 2012;27(6):668-75.
56. Ghoreishi M, Evans CF, DeFilippi CR, Hobbs G, Young CA, Griffith BP, et al. Pulmonary hypertension adversely affects short- and long-term survival after mitral valve operation for mitral regurgitation: implications for timing of surgery. *J Thorac Cardiovasc Surg* 2011;142(6):1439-52.
57. Pai RG, Varadarajan P, Kapoor N, Bansal RC. Aortic valve replacement improves survival in severe aortic stenosis associated with severe pulmonary hypertension. *Ann Thorac Surg* 2007;84(1):80-5.

Formatted: English (U.S.)

Formatted: English (U.S.)

**Table 1: Results of quality assessment of studies on mortality and readmissions for heart failure in patients with pulmonary hypertension associated with left heart disease**

| Nº  | Study                                 | Country/<br>Ethnicity                            | Design                                    | Statistical<br>methods              | Study<br>participation | Study<br>attrition | Measurement<br>of prognostic<br>factors | Assessment<br>of<br>outcomes | Statistical<br>analysis and<br>presentation | Quality<br>score<br>(points) | Quality:<br>+ = high<br>+/- =<br>moderate<br>- = low |
|-----|---------------------------------------|--------------------------------------------------|-------------------------------------------|-------------------------------------|------------------------|--------------------|-----------------------------------------|------------------------------|---------------------------------------------|------------------------------|------------------------------------------------------|
| 1.  | Merlos et al, 2013 <sup>26</sup>      | Spain                                            | Prospective hospital based cohort         | KM, Cox regression                  | 13.5                   | 15                 | 10                                      | 15                           | 15                                          | 68.5                         | +                                                    |
| 2.  | Agawal et al, 2012 <sup>27</sup>      | USA – ethnicity data in 98 patients (63% whites) | Retrospective hospital based cohort       | KM, Cox regression                  | 13.5                   | 7.5                | 12.5                                    | 15                           | 15                                          | 63.5                         | +                                                    |
| 3.  | Agawal R, 2012 <sup>28</sup>          | USA – 96% blacks                                 | Prospective hospital based cohort         | KM, Cox regression                  | 12                     | 10                 | 10                                      | 15                           | 15                                          | 62                           | +                                                    |
| 4.  | Aronson et al, 2011 <sup>29</sup>     | USA                                              | Prospective hospital based cohort         | Cox regression                      | 15                     | 15                 | 15                                      | 15                           | 12.5                                        | 72.5                         | +                                                    |
| 5.  | Bursi et al, 2012 <sup>13</sup>       | USA - Caucasian and blacks                       | Prospective population based cohort study | KM, Logistic regression             | 15                     | 12.5               | 12.5                                    | 12.5                         | 15                                          | 65                           | +                                                    |
| 6.  | Strange et al, 2012 <sup>5</sup>      | Armadale-Australia                               | Retrospective population based cohort     | KM, Logistic and cox regression     | 15                     | 7.5                | 10                                      | 12.5                         | 12.5                                        | 58.5                         | +/-                                                  |
| 7.  | Mutlak et al, 2012 <sup>30</sup>      | USA                                              | Prospective hospital based cohort         | KM, Logistic and cox regression, KM | 13.5                   | 15                 | 10                                      | 15                           | 15                                          | 69                           | +                                                    |
| 8.  | Tatebe et al, 2012 <sup>31</sup>      | Japan                                            | Prospective hospital based cohort         | KM, Logistic and cox regression     | 15                     | 10                 | 15                                      | 15                           | 15                                          | 72.5                         | +                                                    |
| 9.  | Adhyapak et al, 2010 <sup>8</sup>     | India                                            | Prospective hospital based cohort         | Cox regression                      | 13.5                   | 10                 | 10                                      | 12.5                         | 5                                           | 53.5                         | +/-                                                  |
| 10. | Stern et al, 2007 <sup>32</sup>       | USA                                              | Retrospective hospital based cohort       | KM, Cox regression                  | 13.5                   | 15                 | 12.5                                    | 12.5                         | 12.5                                        | 66                           | +                                                    |
| 11. | Lee et al, 2010 <sup>33</sup>         | Korea                                            | Prospective hospital based cohort         | KM, Cox regression                  | 15                     | 15                 | 15                                      | 12.5                         | 15                                          | 72.5                         | +                                                    |
| 12. | Møller et al, 2005 <sup>34</sup>      | USA                                              | Prospective hospital based cohort         | KM, Logistic regression             | 13.5                   | 15                 | 12.5                                    | 15                           | 15                                          | 71                           | +                                                    |
| 13. | Cappola et al, 2012 <sup>35</sup>     | USA, 35% black and 65% whites                    | Prospective hospital based cohort         | KM, Cox regression                  | 13.5                   | 7.5                | 12.5                                    | 15                           | 15                                          | 62.5                         | +                                                    |
| 14. | Szwejkowski et al, 2011 <sup>36</sup> | UK                                               | Retrospective hospital based cohort       | KM, Cox regression                  | 13.5                   | 10                 | 10                                      | 15                           | 15                                          | 61                           | +                                                    |
| 15. | Abramson et al, 1992 <sup>37</sup>    | USA                                              | Prospective hospital based cohort         | KM, Cox regression                  | 12                     | 15                 | 10                                      | 15                           | 12.5                                        | 64.5                         | +                                                    |
| 16. | Kjaergaard et                         | Denmark                                          | Prospective hospital                      | KM, Cox                             | 13.5                   | 15                 | 12.5                                    | 15                           | 15                                          | 71                           | +                                                    |



|     |                                                             |                                |                                                     |                                                  |      |      |      |      |      |      |     |
|-----|-------------------------------------------------------------|--------------------------------|-----------------------------------------------------|--------------------------------------------------|------|------|------|------|------|------|-----|
| 17. | al, 2007 <sup>38</sup><br>Shalaby et al, 2008 <sup>39</sup> | USA, 95% Caucasians            | based cohort<br>Retrospective hospital based cohort | regression<br>KM, Cox regression                 | 13.5 | 12.5 | 15   | 15   | 15   | 71   | +   |
| 18. | Damy et al, 2010 <sup>40</sup>                              | United Kingdom                 | Prospective hospital based cohort                   | KM, logistic and Cox regression                  | 15   | 10   | 15   | 15   | 15   | 70   | +   |
| 19. | Ristow et al, 2007 <sup>40</sup>                            | USA                            | Prospective hospital based cohort                   | Logistic regression                              | 13.5 | 12.5 | 10   | 15   | 5    | 48.5 | +/- |
| 20. | Grigioni et al, 2006 <sup>41</sup>                          | Italy                          | Retrospective cohort                                | KM, logistic regression                          | 13.5 | 12.5 | 12.5 | 15   | 15   | 68.5 | +/- |
| 21. | Levine et al, 1996 <sup>42</sup>                            | USA, mainly Caucasians (78.3%) | Retrospective cohort                                | No logistic regression, no KM analysis           | 12   | 10   | 10   | 7.5  | 2.5  | 42   | -   |
| 22. | Lam et al, 2010 <sup>14</sup>                               | USA                            | Prospective observational community based cohort    | KM, Logistic regression                          | 12   | 15   | 10   | 15   | 12.5 | 68   | +   |
| 23. | Kush et al, 2009 <sup>12</sup>                              | Multicentric USA and Canada    | Prospective cohort in the ESCAPE trial              | KM                                               | 15   | 10   | 15   | 15   | 12.5 | 68.5 | +   |
| 24. | Ghio et al, 2001 <sup>43</sup>                              | Italy                          | Prospective cohort                                  | KM, Cox regression                               | 13.5 | 12.5 | 12.5 | 12.5 | 12.5 | 63.5 | +   |
| 25. | Wang et al, 2010 <sup>17</sup>                              | China                          | Retrospective cohort                                | KM                                               | 12   | 12.5 | 12.5 | 12.5 | 5    | 54.5 | +/- |
| 26. | Ghio et al, 2013 <sup>44</sup>                              | Italy                          | Prospective cohort                                  | KM, Cox and logistic regression                  | 13.5 | 10   | 10   | 15   | 15   | 63.5 | +   |
| 27. | Naidoo et al, 1991 <sup>45</sup>                            | South Africa, Blacks           | Retrospective cohort                                | No logistic regression, no Kaplan Meier analysis | 12   | 7.5  | 10   | 5    | 7.5  | 42   | -   |
| 28. | Fawzy et al, 2004 <sup>49</sup>                             | Saudi Arabia                   | Prospective cohort                                  | No logistic regression, no Kaplan Meier          | 12   | 10   | 12.5 | 15   | 7.5  | 57   | +/- |
| 29. | Roseli et al, 2002 <sup>46</sup>                            | USA                            | Retrospective hospital based cohort                 | KM, Cox regression                               | 13.5 | 10   | 10   | 15   | 12.5 | 63.5 | +/- |
| 30. | Melby et al, 2011 <sup>47</sup>                             | USA                            | Retrospective hospital based cohort                 | KM, Cox regression                               | 13.5 | 12.5 | 10   | 15   | 15   | 66   | +   |
| 31. | Le Tourneau et al, 2010 <sup>48</sup>                       | France, mainly Caucasians      | Prospective hospital based cohort                   | KM, Cox regression                               | 13.5 | 10   | 10   | 15   | 15   | 63.5 | +   |
| 32. | Parker et al, 2010 <sup>7</sup>                             | USA                            | Retrospective hospital based cohort                 | KM, Cox regression                               | 12   | 15   | 12.5 | 15   | 15   | 71   | +   |
| 33. | Kainuma et al, 2011 <sup>49</sup>                           | Japan, Asians                  | Retrospective hospital based cohort                 | KM, Cox regression                               | 10.5 | 10   | 12.5 | 12.5 | 10   | 55.5 | +/- |
| 34. | Barbieri et al, 2010 <sup>11</sup>                          | Multicentric (Europe and USA)  | Prospective hospital based cohort                   | KM, Cox regression                               | 13.5 | 15   | 12.5 | 15   | 15   | 71   | +   |

|     |                                     |               |                                     |                                          |      |     |     |      |      |      |     |
|-----|-------------------------------------|---------------|-------------------------------------|------------------------------------------|------|-----|-----|------|------|------|-----|
| 35. | Manners et al, 1977 <sup>50</sup>   | United Kindom | Retrospective hospital based cohort | No regression analysis, no KM estimation | 10.5 | 7.5 | 5   | 5    | 2.5  | 30.5 | -   |
| 36. | Malouf et al, 2002 <sup>51</sup>    | USA           | Prospective hospital based cohort   | KM, Cox and logistic regression          | 10.5 | 10  | 10  | 15   | 12.5 | 58   | +   |
| 37. | Khandhar et al, 2009 <sup>52</sup>  | USA           | Retrospective hospital based cohort | KM, Cox regression                       | 13.5 | 10  | 10  | 15   | 12.5 | 61   | +/- |
| 38. | Zuern et al, 2012 <sup>53</sup>     | Germany       | Prospective hospital based cohort   | KM, Cox regression                       | 15   | 7.5 | 10  | 15   | 15   | 62.5 | +   |
| 39. | Ben-Dor et al, 2011 <sup>21</sup>   | USA           | Prospective hospital based cohort   | KM, Logistic regression                  | 15   | 10  | 10  | 15   | 15   | 68   | +   |
| 40. | Yang et al, 2012 <sup>54</sup>      | USA           | Retrospective hospital based cohort | KM, Cox and logistic regression          | 15   | 7.5 | 15  | 12.5 | 15   | 65   | +   |
| 41. | Nozohoor et al, 2012 <sup>55</sup>  | Sweden        | Retrospective cohort                | KM, Cox and logistic regression          | 13.5 | 10  | 10  | 15   | 12.5 | 61   | +   |
| 42. | Ward and Hancock 1975 <sup>18</sup> | UK            | Retrospective cohort                | No KM, no logistic or Cox regression     | 12   | 5   | 2.5 | 7.5  | 2.5  | 29.5 | -   |
| 43. | Ghoreishi et al, 2012 <sup>56</sup> | USA           | Retrospective cohort                | KM, Cox and logistic regression          | 15   | 10  | 10  | 10   | 15   | 60   | +   |
| 44. | Cam A et al, 2011 <sup>22</sup>     | USA           | Retrospective cohort                | KM, Cox and logistic regression          | 13.5 | 15  | 10  | 10   | 12.5 | 61   | +   |
| 45. | Pai et al, 2007 <sup>57</sup>       | USA           | Retrospective cohort                | KM, Cox and logistic regression          | 15   | 10  | 10  | 10   | 15   | 60   | +   |

KM: Kaplan Meier; UK: United Kindom; USA:United states of America

Table 2: Study characteristics of studies on mortality and readmissions for heart failure in patients with pulmonary hypertension associated with left heart disease

| Author, Year published                                      | Diagnostic criteria (RVSP by echocardiography or mPAP by echocardiography or RHC) | Study population (sample size, heart disease, NYHA class, type of HF)                                                                        | Mean / Median follow up (months) | Age- Years / Male sex-%  | Definition of outcomes predicted          | Proportion (%) of measurable RVSP | Median/ Mean (mm Hg) baseline RVSP (echo) or mPAP (RHC) | Prevalence of PH at baseline (%) | HF readmission rate or adjusted Odd/Hazard ratios and CI | Mortality (all cause) rate at 6, 12, 24, 36 months or at mean duration of follow up |                                        |              |                                | Adjusted odd/Hazard ratios and CI (or p value) for all-cause mortality, outcome            |
|-------------------------------------------------------------|-----------------------------------------------------------------------------------|----------------------------------------------------------------------------------------------------------------------------------------------|----------------------------------|--------------------------|-------------------------------------------|-----------------------------------|---------------------------------------------------------|----------------------------------|----------------------------------------------------------|-------------------------------------------------------------------------------------|----------------------------------------|--------------|--------------------------------|--------------------------------------------------------------------------------------------|
|                                                             |                                                                                   |                                                                                                                                              |                                  |                          |                                           |                                   |                                                         |                                  |                                                          | 6                                                                                   | 12                                     | 24           | 36 or at mean/median follow up |                                                                                            |
| Studies in patients with heart failure and cardiomyopathies |                                                                                   |                                                                                                                                              |                                  |                          |                                           |                                   |                                                         |                                  |                                                          |                                                                                     |                                        |              |                                |                                                                                            |
| Merlos et al, 2013 <sup>26</sup>                            | RVSP>35 mm Hg                                                                     | 1210 consecutive patients with HF, stratified into normal (RVSP<35), mild (RVSP 36-45), moderate (RVSP 46-60) and severe PH (RVSP >60 mm Hg) | 12                               | 72.6 / 54.1%             | All cause mortality Cardiovascular deaths | 41.5                              | 46                                                      | 35.2                             | NR                                                       | NR                                                                                  | 4.89 per 10 person s-year in severe PH | NA           | NA                             | OR for mild PH 1.6 (0.7-3.74), moderate PH 1.34 (0.54-3.16) and severe PH 2.57 (1.07-6.27) |
| Agawal et al, 2012 <sup>27</sup>                            | RHC with mPAP>25 mm Hg                                                            | 339 patients with PH and LHD, 90% with HFpEF, NYHA class NR                                                                                  | 54.2                             | 63 / 21%                 | All cause mortality                       | NA                                | 43                                                      | NA                               | NR                                                       | NR                                                                                  | 2.9%                                   | 4.4%         | 6.8%                           | UTSW cohort HR 1.4 (1.1-1.9) and NU cohort HR 1.4 (1.1-1.7)                                |
| Agawal, 2012 <sup>28</sup>                                  | RVSP>35                                                                           | 288 patients undergoing hemodialysis stratified into PH and NPH-based on RVSP                                                                | 25.8                             | 56.5 vs 53.1 / 65 vs 63% | All cause mortality                       | NA                                | 44.7 vs 27.2                                            | 38                               | NR                                                       | NR                                                                                  | 26.4 vs 24.5                           | 48.3 vs 46.3 | 62.9 vs 56.3                   | HR 2.17 (1.31-3.61)                                                                        |

|                                   |                                          |                                                                                                                                           |    |                     |                                        |    |                |      |                                |                    |                                                      |               |                         |                                                                    |
|-----------------------------------|------------------------------------------|-------------------------------------------------------------------------------------------------------------------------------------------|----|---------------------|----------------------------------------|----|----------------|------|--------------------------------|--------------------|------------------------------------------------------|---------------|-------------------------|--------------------------------------------------------------------|
| Aronson et al, 2011 <sup>29</sup> | RHC with mPAP≥25 mmHg and mPCWP >15 mmHg | 242 patients with acute HF, divided in 3 groups, NPH, passive PH and reactive PH, NYHA class IV                                           | 6  | 61; 42%             | All cause mortality                    | NA | 34 vs 38 vs 44 | 76.0 | NR                             | 8.6 vs 21. vs 48.3 | NR                                                   | NR            | NR                      | HR for passive PH 1.7 (0.6-4.5) and reactive PH 4.8 (2.1-17.5)     |
| Bursi et al, 2012 <sup>13</sup>   | RVSP > 35 mm Hg                          | 1049 patients with HF stratified into tertiles of RVSP (<41, 41-54 and >54 mm Hg)                                                         | 81 | 76; 49.3%           | All cause mortality                    | NR | 48             | 79   | NA                             | NR                 | 4, 10, and 17% for tertiles 1, 2, and 3 respectively | 8 vs 19 vs 28 | 46*                     | HR for tertile 2: 1.45 (1.13-1.85) and tertile 3: 2.07 (1.62-2.64) |
| Strange et al, 2012 <sup>15</sup> | RVSP > 40 mm Hg                          | 15633 echo screening, 636 PH group 2 stratified into 3 groups (group 1 RVSP < 40 mm Hg, group 2 between 41 and 60 and group 3 > 60 mm Hg) | 83 | 79; 48%             | All cause mortality                    | NR | 52             | NR   | NA                             | NR                 | NR                                                   | NR            | Mean survival 4.2 years | NR                                                                 |
| Mutlak et al, 2012 <sup>30</sup>  | RVSP > 35 mm Hg                          | 1054 patients with acute myocardial infarction divided into NPH and PH groups                                                             | 12 | 60 vs 69; 77 vs 64% | Readmission for HF All cause mortality | NR | 32 vs 43       | 44.6 | 2.1 vs 9.2; OR 3.1 (1.87-5.14) | NR                 | NR                                                   | NR            | NR                      | HR for readmission 3.1 (1.87-5.14)                                 |

|                                  |                                                   |                                                                                                                                                                                                        |      |                             |                                                             |    |                                                                                           |      |                    |                                                              |                                                                  |                                                                  |                                                                    |                                           |
|----------------------------------|---------------------------------------------------|--------------------------------------------------------------------------------------------------------------------------------------------------------------------------------------------------------|------|-----------------------------|-------------------------------------------------------------|----|-------------------------------------------------------------------------------------------|------|--------------------|--------------------------------------------------------------|------------------------------------------------------------------|------------------------------------------------------------------|--------------------------------------------------------------------|-------------------------------------------|
| Tatebe et al, 2012 <sup>21</sup> | RHC with mPAP $\geq$ 25 mmHg<br>mPCWP >15 mmHg    | 676 consecutive patients with chronic HF, NYHA class $\geq$ 2, stratified into 3 groups, NPH (mPAP<25), passive PH (PH with PVR $\geq$ 2.5 WU) or reactive PH (PH with PVR >2.5 WU)                    | 31.2 | 64vs 64vs 63; 63vs 48vs 66% | All cause mortality and readmission for HF                  | NR | 17 vs 30 vs 35 in NPH, passive PH and reactive PH respectively                            | 23   | NR                 | NR                                                           | 24.5 vs 18 vs 18.9% in NPH, passive and reactive PH respectively | 52.5 vs 50 vs 60.3% in NPH, passive and reactive PH respectively | 71.0 vs 77 vs 79.3 in NPH, passive PH and reactive PH respectively | HR for reactive PH group 1.18 (1.03-1.35) |
| Adhyapak, 2010 <sup>8</sup>      | Echocardiography with mPAP > 25 mm Hg             | 147 patients with HF stratified into: group 1, normal PASP/preserved RV function; group 2, normal PASP/RV dysfunction; group 3, high PASP/preserved RV function; and group 4, high PASP/RV dysfunction | 11.2 | 54 91.8%                    | Cardiac death Readmissions                                  | NR | Group 1 20 $\pm$ 5 group 2 24.8 $\pm$ 0.4 group 3 56.8 $\pm$ 6 and group 4 58.9 $\pm$ 8.8 | 53.7 | 19.7, OR and CI NR | Overall 5.1 at 11.2 months, 4.5 in group 3 vs 8.8 in group 4 | NA                                                               | NA                                                               | HR in PH 2.27 (1.09-3.57)                                          |                                           |
| Stern et al, 2007 <sup>32</sup>  | Echocardiography but criteria for PH not reported | 68 patients needing cardiac resynchronization stratified into group 1 (RVSP $\geq$ 50 mmHg, n = 27) and group 2 (RVSP < 50 mmHg, n                                                                     | 7.1  | 70 64.7%                    | composite of hospitalization for HF and all cause mortality | NR | Group 1 39.7 $\pm$ 6.7 and group 2 60.2 $\pm$ 9.2                                         | NR   | NR                 | NR                                                           | Increased mortality in patients with RVSP $\geq$ 50 mm Hg        | NR                                                               | NR                                                                 | HR of 2.0 (1.2-5.5) for RVSP $\geq$ 50    |

1  
2  
3  
4  
5  
6  
7  
8  
9  
10  
11  
12  
13  
14  
15  
16  
17  
18  
19  
20  
21  
22  
23  
24  
25  
26  
27  
28  
29  
30  
31  
32  
33  
34  
35  
36  
37  
38  
39  
40  
41  
42  
43  
44  
45  
46  
47  
48  
49

= 41)

|                                   |                          |                                                                                                                                                                                      |      |                                                                       |                     |    |                                                            |    |    |    |    |                                                    |                                                                      |                                                                        |
|-----------------------------------|--------------------------|--------------------------------------------------------------------------------------------------------------------------------------------------------------------------------------|------|-----------------------------------------------------------------------|---------------------|----|------------------------------------------------------------|----|----|----|----|----------------------------------------------------|----------------------------------------------------------------------|------------------------------------------------------------------------|
| Lee et al, 2010 <sup>33</sup>     | RVSP>39 mm Hg            | 813 patients with TR stratified into two groups based on the RVSP < 39 mmHg (group 1, n = 530) and RVSP ≥ 39 mmHg (group 2, n = 283)                                                 | 58.8 | 64/42.5%                                                              | All cause mortality | NR | 37.1 in patients who survived vs 43.8 in patients who died | NR | NR | NR | NR | 10.5 vs 21.9                                       | 5-year survival rates 61.0 and 80.6% group 2 vs group 1 respectively | HR of 1.024 (1.017–1.032)                                              |
| Møller et al, 2005 <sup>34</sup>  | RVSP>30 mm Hg            | 536 patients with acute myocardial infarction stratified into group 1 (RVSP< 30 mm Hg), group 2 mild to moderate PH (RVSP of 31 to 55 mm Hg) and group 3 severe PH (RVSP > 55 mm Hg) | 40   | 65/68%<br>74/54%<br>%<br>78/44%<br>% in group 1, 2 and 3 respectively | All cause mortality | 69 | NR                                                         | 75 | NR | NR | NR | 5% in group 1 52% in patients with a RVSP>65 mm Hg | NR                                                                   | HR 1.22 (1.14–1.38) per 10 mm Hg increased                             |
| Cappola et al, 2012 <sup>35</sup> | RHC with mPAP ≥ 25 mm Hg | 1134 patients with cardiomyopathy stratified according to PVR: NPH (<2.5), group 1 PH (2.5–3),                                                                                       | 52.8 | 48/60%                                                                | All cause mortality | NA | 25                                                         | NR | NR | NR | NR | NR                                                 | 33% of patients died during the mean FU                              | HR 1.86 (1.30–2.65) for group 2, 1.78 (1.13–2.81) for group 3 and 2.04 |

1  
2  
3  
4  
5  
6  
7  
8  
9  
10  
11  
12  
13  
14  
15  
16  
17  
18  
19  
20  
21  
22  
23  
24  
25  
26  
27  
28  
29  
30  
31  
32  
33  
34  
35  
36  
37  
38  
39  
40  
41  
42  
43  
44  
45  
46  
47  
48  
49

|                                      |                                                 |                                                                                                                                                                       |      |               |                                                                         |    |         |                                                          |                                 |                                        |    |    |                                           |                                                           |
|--------------------------------------|-------------------------------------------------|-----------------------------------------------------------------------------------------------------------------------------------------------------------------------|------|---------------|-------------------------------------------------------------------------|----|---------|----------------------------------------------------------|---------------------------------|----------------------------------------|----|----|-------------------------------------------|-----------------------------------------------------------|
|                                      |                                                 | group2 PH (3-3.5), group3 PH(3.5-4) and group4 PH (>4)                                                                                                                |      |               |                                                                         |    |         |                                                          |                                 |                                        |    |    | (1.51-2.74) for group4                    |                                                           |
| Szwejko et al, 2011 <sup>36</sup>    | RVSP>33 mm Hg                                   | 1612 patients with HF stratified into 5 groups according to RVSP (<33; 33-38; 39-44; 45-52 and >52 mmHg)                                                              | 33.6 | 75.2<br>57.4% | All cause mortality                                                     | 32 | 46      | 83.3                                                     | NR                              | NR                                     | NR | NR | 55.1% of patients died during the mean FU | HR 1.06 (1.03-1.08) for every 5 mm Hg increase in RVSP    |
| Abramson et al, 1992 <sup>37</sup>   | Echocardiography with TRV>2.5 m/s               | 108 patients with dilated cardiomyopathy, stratified into 2 groups: group1 (TRV<2.5 m/s) and group 2 (>2.5 m/s), 38.9% in NYHA class III and IV, 77.3% of ischemic HF | 28   | 67.5<br>81%   | All cause mortality, mortality due to HF and re-hospitalizations for HF | NR | 5.6 m/s | 26                                                       | 75% during the study period     | NR                                     | NR | NR | 157% in 28 months vs 547%                 | OR for increased TRV 3.77 (1.38-10.24)                    |
| Kjaergaard et al, 2007 <sup>38</sup> | Echocardiography but cutoff for PH not reported | 388 consecutive patients with known or presumed HF stratified into quartiles of RVSP (<31, 31-38, 39-50, >50)                                                         | 33.6 | 75<br>60%     | All cause mortality                                                     | NR | 38      | 75% and 50% with RVSP>31 mm Hg and 40 mm Hg respectively | NR                              | 48% if COPD and 21% in HF without COPD | NR | NR | 57% at 33.6 months                        | HR 1.09(1.04-1.14) for every increase of RVSP per 5 mm Hg |
| Shalaby et al, 2008 <sup>39</sup>    | RVSP≥30 mm Hg                                   | 270 patients undergoing cardiac resynchronization                                                                                                                     | 19.4 | 66.5<br>91%   | All cause mortality, cardiac transplantation (primary                   | NR | 40.4    | NR                                                       | 40% in group 3 vs 9% in group 1 | NR                                     | NR | NR | 12% in group 1 vs 34% in group 3 at mean  | HR 2.62 (1.07-6.41)                                       |

|                                    |                                              | stratified into 3 groups on the basis of RVSP: group 1, (22 to 29, n= 86); group 2(30 to 44, n=90) and group 3 (45 to 88, n=94).                                     |    |                                     | end point) or re-hospitalization for HF                                       |                                                                |    | (2.55–15.79)]                                              |                                                                                           |    |    |                           | follow up                              |                                                                                                         |
|------------------------------------|----------------------------------------------|----------------------------------------------------------------------------------------------------------------------------------------------------------------------|----|-------------------------------------|-------------------------------------------------------------------------------|----------------------------------------------------------------|----|------------------------------------------------------------|-------------------------------------------------------------------------------------------|----|----|---------------------------|----------------------------------------|---------------------------------------------------------------------------------------------------------|
| Damy et al, 2010 <sup>16</sup>     | Echocardiography with RVTG>25 mm Hg          | 1380 patients with congestive HF, 1026 with LVSD (EF<45%) and 324 without), further stratified into quartiles of RVSP                                                | 66 | 72, 67%                             | All cause mortality                                                           | 30% of all, 26% in patients with LVSD and 40% in those without | 25 | 46% of HFpEF, 50% of HF rEF and 23% of patients without HF | NA (outpatient cohort)                                                                    | NR | NR | NR                        | 40.3% at median follow up of 66 months | HR 1.72(1.16–2.55) for RVSP>45 mm Hg)                                                                   |
| Ristow et al, 2007 <sup>10</sup>   | Echocardiography with TR gradient > 30 mm Hg | 717 patients with coronary artery disease, 573 with measurable TR, stratified into group I (TR gradient ≤30 mm Hg, n=447) and group 2 (TR gradient >30 mm Hg, n=126) | 36 | 65, 74% (group 1) 69, 75% (group 2) | hospitalization, CV death, all-cause death, and the combined end point of all | 80                                                             | NR | 22                                                         | 6% (group I) vs 21% (group II) OR per each 10 mm Hg increase of TR gradient 1.5(1.03-2.2) | NR | NR | NR                        | 11% (group I) vs 17% (group II)        | OR for all cause deaths 1.2(0.85-1.6) per 10 mm Hg increase in TR OR for combined endpoint 1.6(1.1-2.4) |
| Grigioni et al, 2006 <sup>41</sup> | RHC with mPAP ≥25 mm Hg                      | 196 patients with HF evaluated for PH and changes in mPAP                                                                                                            | 24 | 54, 73%                             | Cardiovascular deaths, acute HF and combined end point of both                | NA                                                             | 25 | NR                                                         | 27% acute HF, 2.30(1.4-2-3.73)                                                            | NR | NR | 20% cardiovascular deaths | NR                                     | HR for PH 2.3 (1.42-3.73) ; HR for worsening >30% in mPAP 2.6(1.45-                                     |



|                                  |                                                                               |                                                                                                                                                                        |      |                                                                              |                                            |                                         |                                                |                                        |                           |          |                                                  |                                                  |                                                                      |                                                        |
|----------------------------------|-------------------------------------------------------------------------------|------------------------------------------------------------------------------------------------------------------------------------------------------------------------|------|------------------------------------------------------------------------------|--------------------------------------------|-----------------------------------------|------------------------------------------------|----------------------------------------|---------------------------|----------|--------------------------------------------------|--------------------------------------------------|----------------------------------------------------------------------|--------------------------------------------------------|
|                                  |                                                                               |                                                                                                                                                                        |      |                                                                              |                                            |                                         |                                                |                                        |                           |          |                                                  |                                                  |                                                                      | 4.67)                                                  |
| Levine et al, 1996 <sup>42</sup> | RHC assessed change in PH, no definition                                      | 60 patients with PH owing to HF awaiting heart transplantation, stratified into 2 groups: group A (persistent elevated sPAP, n=31), group B (decrease in sPAP, n = 29) | 10   | 50<br>85%                                                                    | Transplant or all cause death              | NA                                      | 39 vs 57 in group A and group B respectively   | NA                                     | NR                        | NR       | NR                                               | NR                                               | 90% vs 50% of death at 10 months in group A and group B respectively | NR                                                     |
| Lam al, 2010 <sup>14</sup>       | RVSP> 35 mm Hg                                                                | 244 patients with HFpEF compared with 719 subjects with HTN. 203 patients with HFpEF and PH later stratified into: group 1 (RVSP<48 mm Hg) and group 2 (RVSP>48 mm Hg) | 33.6 | 74/47<br>% vs<br>79*/41<br>% in<br>group1<br>and<br>group2<br>respectively   | All cause mortality                        | 65 vs 83% in HTN and HFpEF respectively | 28 vs 48 mm Hg in HTN and HFpEF respectively   | 8 vs 83% in HTN and HFpEF respectively | NR                        | NR       | 12.2 vs 25.7 in group 1 and group 2 respectively | 18.4 vs 36.2 in group 1 and group 2 respectively | 55.1 vs 63.8 in group 1 and group 2 respectively                     | HR 1.20 per each increase of 10 mmHg in RVSP (p<0.001) |
| Kush et al, 2009 <sup>12</sup>   | RHC with mixed PH (MPH) defined as mPAP≥25 mm Hg, PCWP>15 mm Hg, and PVR≥3 WU | 171 patients with severe HFpEF (NYHA class IV, LVEF≤30%, systolic BP ≤125 mm Hg) further stratified into 2                                                             | 6    | 59/75<br>% vs<br>54*/71<br>% in<br>MPH<br>and<br>non-<br>MPH<br>respectively | Rehospitalizations and all cause mortality | NA                                      | mPAP: 42 vs 32 in MPH and non-MPH respectively | 47                                     | HR for MPH 0.8(0.59-1.08) | 21 vs 22 | NR                                               | NR                                               | NR                                                                   | HR for MPH 0.89(0.66-1.20)                             |

|                                |                                                                     |                                                                                                                                                                                                       |           |               |                                               |    |      |      |    |                                                |    |    |                                                                |                                                                                                            |
|--------------------------------|---------------------------------------------------------------------|-------------------------------------------------------------------------------------------------------------------------------------------------------------------------------------------------------|-----------|---------------|-----------------------------------------------|----|------|------|----|------------------------------------------------|----|----|----------------------------------------------------------------|------------------------------------------------------------------------------------------------------------|
|                                |                                                                     | groups: MPH group (mPAP>25 mm Hg and PVR>3 WU, n= 80) and non-MPH (mPAP<25 mm Hg or PVR<3WU, n=91)                                                                                                    |           |               |                                               |    |      |      |    |                                                |    |    |                                                                |                                                                                                            |
| Ghio et al, 2001 <sup>43</sup> | RHC with mPAP≥20 mm Hg, RV systolic dysfunction defined as RVEF<35% | 377 patients with HF stratified into: group 1, normal mPAP/preserved RVEF (n=73); group 2 normal mPAP/low RVEF (n=68); group3, high PAP/preserved RVEF (n=21); and group 4, high PAP/low RVEF (n=215) | 17.2      | 51<br>85.7%   | Heart transplantation and All cause mortality | NA | 27.9 | 62.3 | NR | NR                                             | NR | NR | 7.3 vs 12.3 vs 23.8 vs 40 in group 1, 2, 3 and 4* respectively | HR 1.1(1.0-1.21) per each 5-mmHg increment                                                                 |
| Wang et al, 2010 <sup>17</sup> | RVSP> 30 mm Hg                                                      | 93 patients with HF undergoing cardiac resynchronization stratified into Group1: (RVSP>50mm H, n=29); Group2: (30<RVSP≤50 mmHg, n=17) and Group3:                                                     | 32 (6-60) | 59.6<br>81.7% | All cause mortality, HF mortality             | NR | NR   | 49.5 | NR | 28 vs 6 vs 17% in group1,2, and 3 respectively | NR | NR | NR                                                             | Non-significant increased in all cause mortality (p=0.33), increase in HF mortality but OR/HR not reported |

1  
2  
3  
4  
5  
6  
7  
8  
9  
10  
11  
12  
13  
14  
15  
16  
17  
18  
19  
20  
21  
22  
23  
24  
25  
26  
27  
28  
29  
30  
31  
32  
33  
34  
35  
36  
37  
38  
39  
40  
41  
42  
43  
44  
45  
46  
47  
48  
49

|                                                     |                                                         |                                                                                                                                                                           |    |                                                                   |                                                                                  |    |                                                     |                                                     |    |                                  |                               |                                |                                       |                                                                 |
|-----------------------------------------------------|---------------------------------------------------------|---------------------------------------------------------------------------------------------------------------------------------------------------------------------------|----|-------------------------------------------------------------------|----------------------------------------------------------------------------------|----|-----------------------------------------------------|-----------------------------------------------------|----|----------------------------------|-------------------------------|--------------------------------|---------------------------------------|-----------------------------------------------------------------|
|                                                     |                                                         | (RVSP≤30mm Hg, n=47)                                                                                                                                                      |    |                                                                   |                                                                                  |    |                                                     |                                                     |    |                                  |                               |                                |                                       |                                                                 |
| Ghio et al, 2013 <sup>44</sup>                      | RVSP>40 mm Hg and RV dysfunction defined as TAPSE<14 mm | 658 patients with chronic HF stratified into group 1 (no PH no RVD, n=256), group 2(RVD, no PH, n=54), group 3(PH, no RVD, n=167), and group 4(RVD and PH, n=67)          | 38 | 63 86%                                                            | All cause mortality, urgent cardiac transplantati on or ventricular fibrillation | 83 | 38                                                  | 35.6                                                | NR | 17.5% in PH vs 4.5% in non PH    | 21.4% in PH vs 8.7% in non PH | 42.3% in PH vs 20.3% in non PH | 59.4% in PH vs 45.2% in non PH        | HR 1.90 (2.18–3.06) for group3 and 4.27 (3.45–7.43) for group 4 |
| <b>Studies in patients with heart valve disease</b> |                                                         |                                                                                                                                                                           |    |                                                                   |                                                                                  |    |                                                     |                                                     |    |                                  |                               |                                |                                       |                                                                 |
| Fawzy et al, 2004 <sup>19</sup>                     | Severe PH defined as RVSP> 50 mm Hg                     | 559 patients with MS undergoing MBV stratified into three groups: group A (RVSP<50 mmHg; n = 345); group B (RVSP 50-79 mmHg; n = 183) and group C (RVSP ≥80 mmHg; n = 31) | 63 | 31/28.1% vs 30/25.1% vs 27/16.1% in group A, B and C respectively | Reversibility of PH following MBV                                                | NR | 38.5 vs 59 vs 97.8 in group A, B and C respectively | 62% vs 33% vs 5% for group A, B, and C respectively | NR | 0                                | 0                             | 0                              | 0                                     | No mortality was encountered, PH normalized over a 6-12 months  |
| Naidoo et al, 1991 <sup>45</sup>                    | RHC with PASP≥30 mm Hg                                  | 139 patients with AR (69 undergoing AVS) stratified into group I (normal or mild PH) and group II (moderate PH or marked PH)                                              | 6  | 32.9 vs 36.2 and 69.7 vs 77.8 in group I and II respectively      | Immediate and 6 months post-operative mortality                                  | NA | 18 vs 43.7 in group I and II respectively           | 63.3                                                | NR | 3 in group I vs 2.8% in group II | NR                            | NR                             | NR                                    | No increased in mortality, HR not reported                      |
| Manners et al, 1977 <sup>50</sup>                   | RHC with PASP > 70 mm Hg                                | 392 patients who had undergone prosthetic valve surgery stratified into 2 PASP<70 mm Hg,                                                                                  | 48 | NR                                                                | Hospital mortality                                                               | NA | Mean PASP was 93 mm Hg                              | NR                                                  | NR | NR                               | NR                            | NR                             | 5.4% at 4 years in both PH and non PH | NR                                                              |

| n=336 or PASP>70 mm Hg, n=56)         |                |                                                                                                                                                      |          |                                                             |                                             |    |                |                        |    |                      |                                                                                    |                                           |                              |                                                                                      |
|---------------------------------------|----------------|------------------------------------------------------------------------------------------------------------------------------------------------------|----------|-------------------------------------------------------------|---------------------------------------------|----|----------------|------------------------|----|----------------------|------------------------------------------------------------------------------------|-------------------------------------------|------------------------------|--------------------------------------------------------------------------------------|
| Roseli et al, 2002 <sup>46</sup>      | RVSP>35 mm Hg  | 2385 patients undergoing AVR stratified into 3 groups: RVSP < 35 mm Hg n= 611; RVSP 35 -50 mm Hg, n= 1199; RVSP>50 mm Hg, n= 575                     | 51<br>.6 | 74<br>55%                                                   | All cause hospital and late mortality       | NR | 41             | 74                     | NR | 15.8 vs 19.7 vs 25.9 | NR                                                                                 | NR                                        | NR                           | Higher RVSP was predictor of 5 and 10 years mortality, HR not reported               |
| Melby et al, 2011 <sup>47</sup>       | RVSP>35 mm Hg  | 1080 patients with AS undergoing AVR, stratified into NPH, (RVSP<35 mm Hg, n=574) and PH group( mild PH, moderate and severe PH)                     | 48       | 72.3 vs 70.2 vs 59.1 vs 57.8% in PH and non PH respectively | All cause operative and long term mortality | NR | 51 in PH group | 46.8                   | NR | NR                   | 17.1 vs 17.6 vs 17.1 vs 23.5 for non PH, mild, moderate and severe PH respectively | 25.7 vs 24 vs 23.2 vs 32.3                | 25.7 vs 38.4 vs 52.7 vs 46.1 | OR 1.51 (1.16-1.96), persistent PH after AVR was associated with Decreased survival. |
| Le Tourneau et al, 2010 <sup>48</sup> | RVSP≥50 mm Hg  | 256 patients with MR undergoing MVO, stratified into group1(RVSP<50 mm Hg, n=174) and group2( RVSP≥50 mm Hg, n=82)                                   | 49<br>.2 | 63<br>66%                                                   | All cause mortality Cardiovascular deaths   | NR | 45±14          | 32% had RVSP≥ 50 mm Hg | NR | NR                   | NR                                                                                 | 31.6 vs 31.7 in group1 and 2 respectively | NR                           | HR 1.43 (1.09-1.88) per 10 mmHg increment of RVSP                                    |
| Parker et al, 2010 <sup>7</sup>       | RVSP> 35 mm Hg | 1156 patients with MR or AR stratified into normal (RVSP<30 mm Hg), borderline (31-34 mm Hg), mild (35-40 mm Hg), or moderate or greater (>40 mm Hg) | 87<br>.6 | 72<br>51%                                                   | All cause mortality                         | 52 | 29             | NR                     | NR | NR                   | NR                                                                                 | NR                                        | NR                           | HR for moderate or greater PH 1.95(1.58-2.41) in AR and 1.48(1.26-1.75) in MR        |

|                                    |                                               |                                                                                                                                                                           |          |           |                                                                                                                                                         |                                                                   |          |                                                                          |    |    |    |                                                        |                                                                             |                                                                        |
|------------------------------------|-----------------------------------------------|---------------------------------------------------------------------------------------------------------------------------------------------------------------------------|----------|-----------|---------------------------------------------------------------------------------------------------------------------------------------------------------|-------------------------------------------------------------------|----------|--------------------------------------------------------------------------|----|----|----|--------------------------------------------------------|-----------------------------------------------------------------------------|------------------------------------------------------------------------|
| Barbieri et al, 2010 <sup>11</sup> | RVSP> 50 mm Hg                                | 437 patients with MR, 35% NYHA class III or IV, normal LVEF, stratified into NPH (RVSP≤50mm Hg) and PH (RVSP>50 mm Hg)                                                    | 57<br>.6 | 67<br>66% | All cause mortality, cardiovascular death, heart failure                                                                                                | 45                                                                | 23       | 1.70 (1.10–2.62) and 1.19 (1.06–1.35) for each 10 mm Hg increase of RVSP | NR | NR | NR | 23% at the follow up                                   | HR 2.03 (1.30–3.18) and 1.16 (1.03–1.31) for each 10 mm Hg increase of RVSP |                                                                        |
| Kainuma et al, 2011 <sup>49</sup>  | Echocardiography, PH definition not specified | 46 patients undergoing MVR, NYHA III or IV, LVEF<40%, stratified into group 1 (RVSP< 40 mm Hg, n=19), group 2 (moderate PH (40<RVSP<60, n=17) and group 3 (RVSP>60, n=10) | 36<br>R  | 64<br>35% | Cardiac death, myocardial infarction, endocarditis, thromboembolism, reoperation for recurrent MR, readmission for heart failure, and fatal arrhythmia. | 47                                                                | NR       | 30% in the severe PH but not significant, OR and CI NR                   | NR | NR | NR | 15.8 vs 11.8 vs 20% for group 1, 2, and 3 respectively | 31.6 vs 29.4 vs 30%<br>47.4 vs 82.4 vs 50%                                  | HR for all adverse cardiac events 6.9 (1.1–44) in group 3              |
| Khandhar et al, 2009 <sup>52</sup> | Severe PH defined as RVSP>60 mm Hg            | 506 patients with severe AR stratified into group 1, severe PH with RVSP>60 mm Hg, n= 83 and group 2 (RVSP<60, n=423), NYHA NR                                            | N<br>R   | 63<br>47% | All cause mortality                                                                                                                                     | 100                                                               | NR       | 16% of severe PH                                                         | NR | NR | NR | 21.6 of patients with severe PH                        | NR                                                                          | PH was associated with increased mortality in all groups, OR and CI NR |
| Malouf et al, 2002 <sup>51</sup>   | Severe PH defined as peak TRV≥4 m/s           | 3171 patients with AS of whom 47 with severe PH, stratified into group 1 (no AVR, n = 10) and group 2 (AVR, n= 37), 79% in NYHA III and IV                                | 15<br>.3 | 78<br>47% | All cause mortality                                                                                                                                     | 63% of the 3171 total population of patients with aortic stenosis | 4.16 m/s | NA                                                                       | NR | NR | NR | NR                                                     | 80% vs. 32% in group 1 and 2 respectively at median FU                      | OR for mortality risk in severe PH and AVS 1.76 (0.81–3.35)            |

|                                     |                                                                     |                                                                                                                                                  |      |                                                                |                                                          |    |                                                        |      |    |    |                                             |                                           |                                                                      |                                                                                |
|-------------------------------------|---------------------------------------------------------------------|--------------------------------------------------------------------------------------------------------------------------------------------------|------|----------------------------------------------------------------|----------------------------------------------------------|----|--------------------------------------------------------|------|----|----|---------------------------------------------|-------------------------------------------|----------------------------------------------------------------------|--------------------------------------------------------------------------------|
| Zuern et al, 2012 <sup>53</sup>     | RVSP > 30 mm Hg                                                     | 200 patients with AS undergoing AVR stratified into NPH (RVSP < 30) vs mild-to-moderate PH (30 < RVSP < 60) and severe PH (> 60 mm Hg)           | 31.2 | 72.3 vs 52.5%                                                  | All cause mortality                                      | NR | 36.3                                                   | 61   | NR | NR | 10.2 vs 14.1 vs 30.4                        | 30.7 vs 40.4 vs 60.1                      | 2.6, 15.2 and 26.1%                                                  | HR for mild to moderate PH 4.9 (1.1-21.8) and severe PH 3.3 (0.6-19.7)         |
| Ben-Dor et al, 2011 <sup>21</sup>   | RVSP > 40 mm Hg                                                     | 509 patients with AS divided into group 1 (RVSP < 40 mm Hg, n = 161); group 2 (RVSP 40-59, n = 175) and group 3 (RVSP > 60 mm Hg, n = 173)       | 6.73 | 82.3 vs 82.4 vs 80.5 in group 1, 2, and 3 respectively, > 75%  | All cause mortality                                      | NR | 33.7 vs 49.3 vs 70.7 in group 1, 2, and 3 respectively | 68.3 | NR | NR | NR                                          | NR                                        | 21.7 vs 39.3 vs 49.1 in group 1, 2, and 3 respectively at median FU* | PH was significantly associated with increase in mortality, OR/HR not reported |
| Yang et al, 2012 <sup>54</sup>      | RVSP > 40 mm Hg                                                     | 845 patients who underwent valve surgery and/or CABG (444 without PH or NPH vs 401 PH), all with LVEF < 40%                                      | 39   | 65.2 vs 67.8 vs 78.8 vs 72.6% in NPH and PH group respectively | Post operative complications and mortality               | NR | NR                                                     | NR   | NR | NR | 4.6 vs 13.9 in NPH vs PH group respectively | NR                                        | 16.7 vs 30.6* in NPH vs PH group respectively                        | OR for mild/moderate PH 1.475 (1.119-1.943)                                    |
| Nozohoor et al, 2012 <sup>55</sup>  | RVSP > 50 mm Hg                                                     | 270 patients with MR undergoing MVS, stratified into NPH group (RVSP < 50 mm Hg) and PH group (RVSP ≥ 50 mm Hg)                                  | 61.2 | 61.5 vs 66.5 vs 70 vs 54% in no PH and PH group respectively   | Perioperative complications and all cause late mortality | NR | NR                                                     | 27   | NR | NR | 7.6 vs 8.2 in no PH and PH respectively     | 22.4 vs 17.6 in no PH and PH respectively | 31.1 in both groups                                                  | HR 4.3 (1.1-17.4) during the initial 3 years after MVS                         |
| Ward and Hancock 1975 <sup>18</sup> | RHC with extreme PH defined as SPAP > 80 mmHg and PVR > 10 Wu: 8.2% | Mitral valve disease (n = 586), 48 extreme PH stratified into group 1 (no operation), group 2 (all surgical) and group 3 (survive after surgery) | 69.6 | 46.2 vs 42.4 vs 43 vs 29% in group 1 and 2 respectively        | All-cause mortality                                      | NA | 105 vs 96.6                                            | 8.2  | NA | NR | NR                                          | NR                                        | NR                                                                   | Extreme PH was associated with higher mortality, and surgery improved survival |

1  
2  
3  
4  
5  
6  
7  
8  
9  
10  
11  
12  
13  
14  
15  
16  
17  
18  
19  
20  
21  
22  
23  
24  
25  
26  
27  
28  
29  
30  
31  
32  
33  
34  
35  
36  
37  
38  
39  
40  
41  
42  
43  
44  
45  
46  
47  
48  
49

|                                     |                                                                    |                                                                                                                                                                   |          |                                                   |                                              |    |                                             |       |    |    |                                    |                                      |                                      |                                                                                |
|-------------------------------------|--------------------------------------------------------------------|-------------------------------------------------------------------------------------------------------------------------------------------------------------------|----------|---------------------------------------------------|----------------------------------------------|----|---------------------------------------------|-------|----|----|------------------------------------|--------------------------------------|--------------------------------------|--------------------------------------------------------------------------------|
| Ghoreishi et al, 2012 <sup>56</sup> | sPAP>40 mm Hg using RHC in 591 patients and RVSP>40 mm Hg using DE | 873 patients with MR who underwent MVS, stratified into NPH and PH group (mild, moderate, severe) NHYA not reported                                               | 35       | 59<br>59%                                         | Hospital mortality, Late all cause mortality | NR | 46 (echo), and sPAP was 43 by RHC           | 53    | NR | NR | 16.2 in non PH vs 32% in PH group* | 33.9 in non PH vs 48.1% in PH group* | 51.8 in non PH vs 60.9% in PH group* | HR 1.018(1.007-1.028) per each 1 mm Hg increment in RVSP                       |
| Cam A et al, 2011 <sup>22</sup>     | RHC with severe PH defined as mPAP>35 mm Hg                        | 317 patients with AS, 35 with severe PH underwent surgery and were compared to 114 mild moderate PH and to 46 severe PH treated conservatively, NHYA not reported | 11<br>.3 | 71/53.5 (mild-moderate PH) vs 75/51.4 (severe PH) | All cause mortality                          | NA | 22.5 (mild-moderate PH) vs 45.3 (severe PH) | 47.0  | NR | NR | NR                                 | NR                                   | 74.5 vs 75.5                         | HR 1.008 (0.9-1.11) and early post-operative reduction in mPAP 0.93 (1.2-12.5) |
| Pai et al, 2007 <sup>57</sup>       | Severe PH defined as RVSP>60 mm Hg                                 | 116 patients (of 740 severe AS) with severe PH among which 36 underwent AVR and were compare to 83 remaining                                                      | 18       | 75<br>39%                                         | All cause mortality                          | NR | 69 (severe PH)                              | 15.7% | NR | NR | NR                                 | 30.5 (PH) vs 15.5(NP H)              | NR                                   | AVR benefit HR 0.28 (0.16-0.51) independent of PH.                             |

AS(R): Aortic stenosis(regurgitation); AVS(R): Aortic valve surgery(replacement); CABG: Coronary artery bypass graft; DE(Doppler echocardiography); eSPAP: Estimated systolic pulmonary artery pressure; HFpEF: Heart failure (HF) and preserved ejection fraction; LVEF: Left ventricular (LV) ejection fraction; MBV: Mitral Balloon Valvotomy; mPAP: mean pulmonary arterial pressure; mPCWP: mean pulmonary capillary wedge pressure; MV(R/O): Mitral valve (Repair/Operation); NPH: Non pulmonary hypertension; PH: Pulmonary hypertension; PVR: Pulmonary vascular resistance; RV(SP/TG): Right ventricular systolic pressure/tricuspid gradient); TPG: Transpulmonary gradient; TRV: Tricuspid regurgitation(TR) velocity(TRV); UTSW: University of Texas—Southwestern; WU: Wood units; P<0.05 \*\*

**Table 3: Other prognostic factors associated with mortality in patients with pulmonary hypertension associated with left heart disease**

| Factor                                                           | Number of studies reporting |                     | Number of studies in which the factor was associated with poor outcome |                            |
|------------------------------------------------------------------|-----------------------------|---------------------|------------------------------------------------------------------------|----------------------------|
|                                                                  | overall                     | Studies based on DE | Studies of PH based on DE                                              | Studies of PH based on RHC |
| Age                                                              | 14                          | 11                  | 11                                                                     | 3                          |
| Sex (male vs female)                                             | 11                          | 9                   | 3                                                                      | 0                          |
| Racial / ethnic group                                            | 2                           | 2                   | 0                                                                      | 0                          |
| HF episodes                                                      | 5                           | 5                   | 2                                                                      | 0                          |
| Prior hypertension                                               | 5                           | 5                   | 1                                                                      | 0                          |
| History of diabetes                                              | 8                           | 8                   | 3                                                                      | 0                          |
| Smoking                                                          | 3                           | 3                   | 0                                                                      | 0                          |
| History of cardiovascular disease                                | 1                           | 1                   | 1                                                                      | 0                          |
| Functional class (NYHA/WHO)                                      | 12                          | 9                   | 5                                                                      | 2                          |
| Killip class for MI                                              | 2                           | 2                   | 2                                                                      | 0                          |
| Heart rate                                                       | 2                           | 2                   | 0                                                                      | 0                          |
| Systolic BP                                                      | 4                           | 4                   | 2                                                                      | 0                          |
| Diastolic BP                                                     | 1                           | 1                   | 1                                                                      | 0                          |
| Mean BP                                                          | 1                           | 1                   | 1                                                                      | 0                          |
| SPO <sub>2</sub>                                                 | 3                           | 3                   | 1                                                                      | 0                          |
| Hypotension                                                      | 1                           | 1                   | 1                                                                      | 0                          |
| Atrial fibrillation                                              | 5                           | 5                   | 5                                                                      | 0                          |
| Ischemic etiology of HF                                          | 4                           | 4                   | 0                                                                      | 0                          |
| Urea                                                             | 2                           | 2                   | 1                                                                      | 0                          |
| Kidney disease (by creatinine, GFR, or hemodialysis)             | 17                          | 14                  | 6                                                                      | 0                          |
| BNP                                                              | 3                           | 3                   | 2                                                                      | 0                          |
| Hemoglobin                                                       | 2                           | 2                   | 0                                                                      | 0                          |
| Presence of COPD                                                 | 4                           | 3                   | 3                                                                      | 0                          |
| Use of medications (ACEI and or beta blockers or spironolactone) | 6                           | 6                   | 3                                                                      | 0                          |
| LVEF                                                             | 10                          | 10                  | 6                                                                      | NA                         |
| LV end diastolic diameter /index                                 | 6                           | 6                   | 3                                                                      | NA                         |
| Atrial diameter                                                  | 1                           | 1                   | 1                                                                      | NA                         |
| Deceleration time                                                | 1                           | 1                   | 0                                                                      | NA                         |
| RV function (by TAPSE or other means)                            | 3                           | 3                   | 3                                                                      | NA                         |
| Functional mitral regurgitation                                  | 5                           | 5                   | 4                                                                      | NA                         |
| RVSP <sub>≥</sub> 50 or > 60 mm Hg                               | 9                           | 9                   | 5                                                                      | NA                         |
| End diastolic pulmonary regurgitation                            | 1                           | 1                   | 1                                                                      | NA                         |

ACEI: Angiotensin converting enzyme inhibitors; BNP: Brain natriuretic peptide; BP: Blood pressure; COPD: Chronic obstructive pulmonary disease; GFR: Glomerular filtration rate; HF: Heart failure; MI: Myocardial infarction; NYHA: New York Heart Association; RVSP: Right ventricular systolic pressure; RV: Right ventricle; TAPSE: Tricuspid annular plan systolic excursion; WHO: World Heart Organization.



1  
2  
3  
4  
5  
6  
7  
8  
9  
10  
11  
12  
13  
14  
15  
16  
17  
18  
19  
20  
21  
22  
23  
24  
25  
26  
27  
28  
29  
30  
31  
32  
33  
34  
35  
36  
37  
38  
39  
40  
41  
42  
43  
44  
45  
46  
47  
48  
49  
50  
51  
52  
53  
54  
55  
56  
57  
58  
59  
60

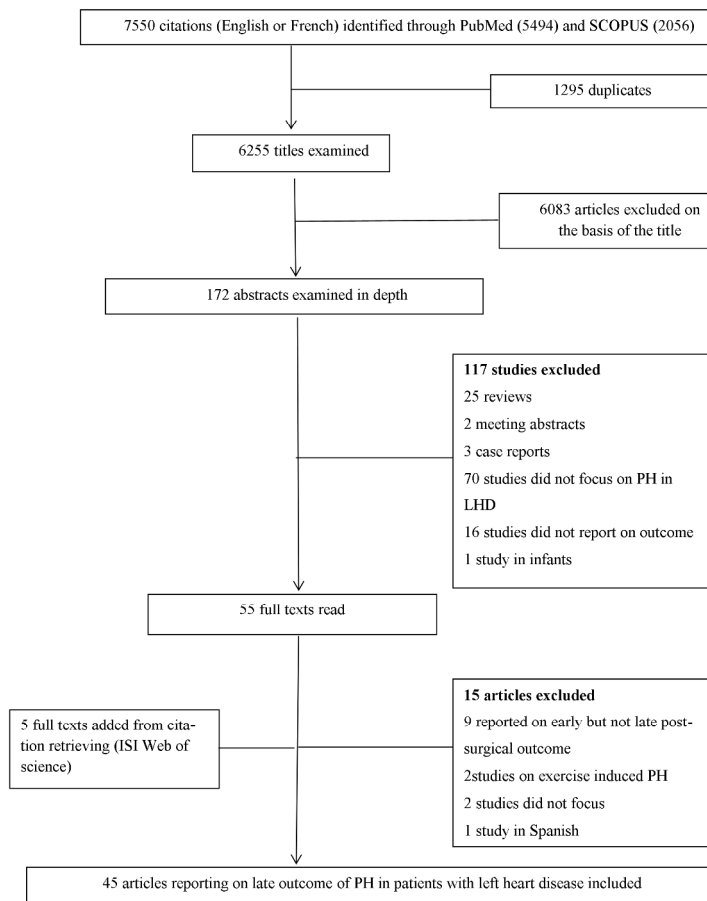

209x297mm (300 x 300 DPI)

1  
2  
3  
4  
5  
6  
7  
8  
9  
10  
11  
12  
13  
14  
15  
16  
17  
18  
19  
20  
21  
22  
23  
24  
25  
26  
27  
28  
29  
30  
31  
32  
33  
34  
35  
36  
37  
38  
39  
40  
41  
42  
43  
44  
45  
46  
47  
48  
49  
50  
51  
52  
53  
54  
55  
56  
57  
58  
59  
60

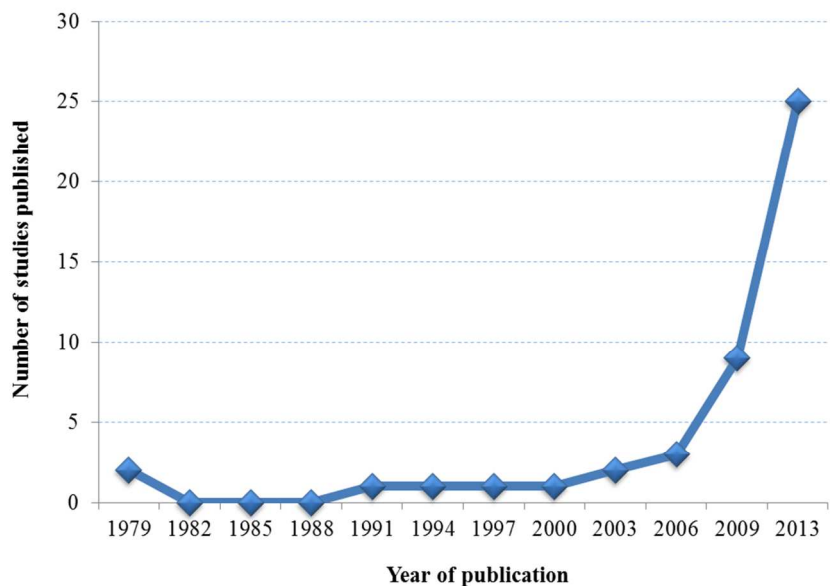

Number of studies on outcome of pulmonary hypertension associated with left heart disease identified over time  
297x209mm (300 x 300 DPI)

ew only

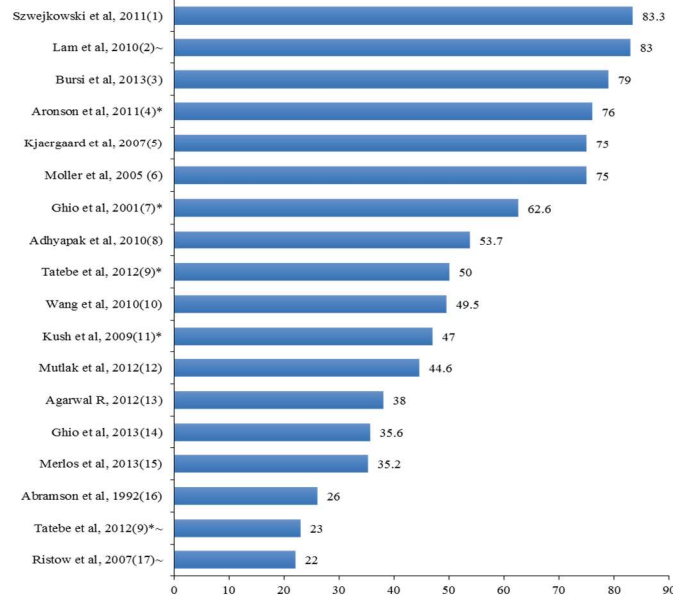

× Studies that used right heart catheterization for diagnosis of PH  
 ~ Studies in patients with preserved ejection fraction

Prevalence of pulmonary hypertension in some selected studies in patients with heart failure  
 297x209mm (300 x 300 DPI)

1  
2  
3  
4  
5  
6  
7  
8  
9  
10  
11  
12  
13  
14  
15  
16  
17  
18  
19  
20  
21  
22  
23  
24  
25  
26  
27  
28  
29  
30  
31  
32  
33  
34  
35  
36  
37  
38  
39  
40  
41  
42  
43  
44  
45  
46  
47  
48  
49  
50  
51  
52  
53  
54  
55  
56  
57  
58  
59  
60

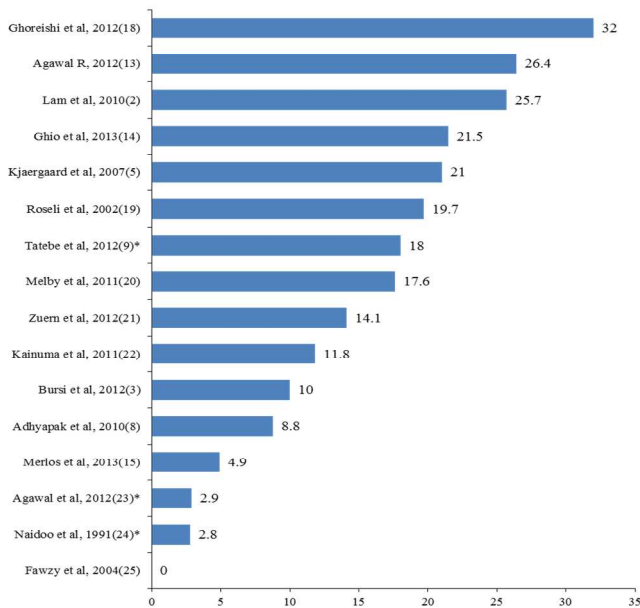

\* Studies that used right heart catheterization for diagnosis of PH

Mortality rates at 12 months in some selected studies in patients with pulmonary hypertension associated with left heart disease\*\*  
297x209mm (300 x 300 DPI)

ew only

1  
2  
3  
4  
5  
6  
7  
8  
9  
10  
11  
12  
13  
14  
15  
16  
17  
18  
19  
20  
21  
22  
23  
24  
25  
26  
27  
28  
29  
30  
31  
32  
33  
34  
35  
36  
37  
38  
39  
40  
41  
42  
43  
44  
45  
46  
47  
48  
49  
50  
51  
52  
53  
54  
55  
56  
57  
58  
59  
60

- Online box, table and references section for figures -

**Predictors of hospitalizations for heart failure and mortality in patients with pulmonary hypertension associated with left heart disease: A systematic review**

(manuscript ID bmjopen-2014-004843.R1)

For peer review only

**Online box: Search terms used in the builder*****For pubmed:***

(((pulmonary hypertension) OR pulmonary pressure)) AND (((heart failure) OR left heart disease) OR valvular heart disease)) AND ((((((predict) OR outcome) OR risk) OR prognosis) OR discrimination) OR c statistic)

***For Scopus:***

(((pulmonary hypertension) OR pulmonary pressure)) AND (((heart failure) OR left heart disease) OR valvular heart disease)) AND ((((((predict) OR outcome) OR risk) OR prognosis) OR discrimination) OR c statistic) AND (LIMIT-TO(SUBJAREA, "MEDI")) AND (LIMIT-TO(EXACTKEYWORD, "Heart failure") OR LIMIT-TO(EXACTKEYWORD, "Mortality") OR LIMIT-TO(EXACTKEYWORD, "Prognosis") OR LIMIT-TO(EXACTKEYWORD, "Echocardiography") OR LIMIT-TO(EXACTKEYWORD, "Risk Factors") OR LIMIT-TO(EXACTKEYWORD, "Heart Failure") OR LIMIT-TO(EXACTKEYWORD, "Pulmonary hypertension") OR LIMIT-TO(EXACTKEYWORD, "Treatment Outcome") OR LIMIT-TO(EXACTKEYWORD, "Follow up")) AND (LIMIT-TO(SUBJAREA, "MEDI")) AND (LIMIT-TO(LANGUAGE, "English") OR LIMIT-TO(LANGUAGE, "French"))

**Online table: Scoring algorithm developed by de Jonge et al<sup>6</sup> to strengthen the discriminative capacity of the QUIPS\***

| Criteria**                                         | Score |     |   |
|----------------------------------------------------|-------|-----|---|
|                                                    | +     | +/- | - |
| <b>1. Study participation</b>                      |       |     |   |
| • Target population                                | 3     | 1.5 | 0 |
| • Sampling frame                                   | 3     | 1.5 | 0 |
| • Inclusion criteria                               | 3     | 1.5 | 0 |
| • Baseline study population                        | 3     | 1.5 | 0 |
| • Adequate study participation                     | 3     | 1.5 | 0 |
| <b>2. Study attrition</b>                          |       |     |   |
| • Proportion of population available for analysis  | 5     | 2.5 | 0 |
| • Outcome and prognostic factor information on     | 5     | 2.5 | 0 |
| • Reasons and potential impact of subjects lost to | 5     | 2.5 | 0 |
| <b>3. Measurement of prognostic factors</b>        |       |     |   |
| • Definition of prognostic factor                  | 5     | 2.5 | 0 |
| • Valid and reliable measurement of prognostic     | 5     | 2.5 | 0 |
| • Method and setting of prognostic factor          | 5     | 2.5 | 0 |
| <b>4. Measurement of outcomes</b>                  |       |     |   |
| • Definition of outcome                            | 5     | 2.5 | 0 |
| • Valid and reliable measurement of outcome        | 5     | 2.5 | 0 |
| • Method and setting of outcome measurement        | 5     | 2.5 | 0 |
| <b>5. Statistical analysis and presentation</b>    |       |     |   |
| • Presentation of analytical strategy              | 5     | 2.5 | 0 |
| • Model development strategy                       | 5     | 2.5 | 0 |
| • Reporting of results                             | 5     | 2.5 | 0 |

\* QUIPS: Quality In Prognosis Studies

\*\* Used (adapted) QUIPS list for scoring methodological quality of prognosis studies

All five domains were given a maximum of 15 points each, equally distributed across all items per category. For four items we assigned 5 points in case of low risk of bias and 2.5 and 0 in case of moderate and high risk of bias, respectively, except for category 1 (patient selection bias) containing five instead of three items, for which we assigned 3 points in case of low risk of bias and 1.5 and 0 in case of moderate and high risk of bias, respectively. A total score, with a maximum of 75 points, was calculated by summing up the scores per item. A priori, we chose to consider  $\geq 60$  points ( $\geq 80\%$  of the maximum attainable score) as high quality, between 45 and 60 points ( $\geq 60\%$  of the maximum attainable score) as moderate/high quality and  $< 45$  points as low quality studies.

## References

1. Szwejkowski BR, Elder DH, Shearer F, Jack D, Choy AM, Pringle SD, et al. Pulmonary hypertension predicts all-cause mortality in patients with heart failure: a retrospective cohort study. *Eur J Heart Fail.* 2012 Feb;14(2):162-7.
2. Lam CSP, Roger VL, Rodeheffer RJ, Borlaug BA, Enders FT, Redfield MM. Pulmonary Hypertension in Heart Failure With Preserved Ejection Fraction: A Community-Based Study. *Journal of the American College of Cardiology.* 2009;53(13):1119-26.
3. Bursi F, McNallan SM, Redfield MM, Nkomo VT, Lam CSP, Weston SA, et al. Pulmonary Pressures and Death in Heart Failure A Community Study. *Journal of the American College of Cardiology.* 2012;59(3):222-31.
4. Aronson D, Eitan A, Dragu R, Burger AJ. Relationship between reactive pulmonary hypertension and mortality in patients with acute decompensated heart failure. *Circ Heart Fail.* 2011 Sep;4(5):644-50.
5. Kjaergaard J, Akkan D, Iversen KK, Kjoller E, Kober L, Torp-Pedersen C, et al. Prognostic importance of pulmonary hypertension in patients with heart failure. *Am J Cardiol.* 2007 Apr 15;99(8):1146-50.
6. Moller JE, Hillis GS, Oh JK, Pellikka PA. Prognostic importance of secondary pulmonary hypertension after acute myocardial infarction. *Am J Cardiol.* 2005 Jul 15;96(2):199-203.
7. Ghio S, Gavazzi A, Campana C, Inserra C, Klersy C, Sebastiani R, et al. Independent and additive prognostic value of right ventricular systolic function and pulmonary artery pressure in patients with chronic heart failure. *Journal of the American College of Cardiology.* 2001;37(1):183-8.
8. Adhyapak SM. Effect of right ventricular function and pulmonary pressures on heart failure prognosis. *Prev Cardiol.* 2010;13(2):72-7.



- 1  
2  
3  
4 9. Tatebe S, Fukumoto Y, Sugimura K, Miyamichi-Yamamoto S, Aoki T, Miura Y, et al.  
5  
6 Clinical significance of reactive post-capillary pulmonary hypertension in patients  
7  
8 with left heart disease. *Circ J*. 2012;76(5):1235-44.
- 9  
10 10. Wang D, Han Y, Zang H, Yu H, Wang S, Wang Z, et al. Prognostic effects of pulmonary  
11  
12 hypertension in patients undergoing cardiac resynchronization therapy. *Journal of*  
13  
14 *Thoracic Disease*. 2010;2(2):71-5.
- 15  
16 11. Khush KK, Tasissa G, Butler J, McGlothlin D, De Marco T. Effect of pulmonary  
17  
18 hypertension on clinical outcomes in advanced heart failure: Analysis of the  
19  
20 Evaluation Study of Congestive Heart Failure and Pulmonary Artery Catheterization  
21  
22 Effectiveness (ESCAPE) database. *American Heart Journal*. 2009;157(6):1026-34.
- 23  
24 12. Mutlak D, Aronson D, Carasso S, Lessick J, Reisner SA, Agmon Y. Frequency,  
25  
26 determinants and outcome of pulmonary hypertension in patients with aortic valve  
27  
28 stenosis. *Am J Med Sci*. 2012 May;343(5):397-401
- 29  
30 13. Agarwal R. Prevalence, determinants and prognosis of pulmonary hypertension  
31  
32 among hemodialysis patients. *Nephrol Dial Transplant*. 2012 Oct;27(10):3908-14.
- 33  
34 14. Ghio S, Temporelli PL, Klersy C, Simioniuc A, Girardi B, Scelsi L, et al. Prognostic  
35  
36 relevance of a non-invasive evaluation of right ventricular function and pulmonary  
37  
38 artery pressure in patients with chronic heart failure. *European Journal of Heart*  
39  
40 *Failure*. 2013 April 1, 2013;15(4):408-14.
- 41  
42 15. Merlos P, Nunez J, Sanchis J, Minana G, Palau P, Bodi V, et al. Echocardiographic  
43  
44 estimation of pulmonary arterial systolic pressure in acute heart failure. Prognostic  
45  
46 implications. *Eur J Intern Med*. 2013;24(6):562-7
- 47  
48 16. Abramson SV, Burke JF, Kelly JJ, Jr., Kitchen JG, 3rd, Dougherty MJ, Yih DF, et al.  
49  
50 Pulmonary hypertension predicts mortality and morbidity in patients with dilated  
51  
52 cardiomyopathy. *Ann Intern Med*. 1992 Jun 1;116(11):888-95.
- 53  
54 17. Ristow B, Ali S, Ren X, Whooley MA, Schiller NB. Elevated pulmonary artery pressure  
55  
56 by Doppler echocardiography predicts hospitalization for heart failure and mortality  
57  
58 in ambulatory stable coronary artery disease: the Heart and Soul Study. *J Am Coll*  
59  
60 *Cardiol*. 2007 Jan 2;49(1):43-9.
18. Ghoreishi M, Evans CF, DeFilippi CR, Hobbs G, Young CA, Griffith BP, et al. Pulmonary  
hypertension adversely affects short- and long-term survival after mitral valve

- 1  
2  
3 operation for mitral regurgitation: implications for timing of surgery. *J Thorac*  
4 *Cardiovasc Surg.* 2011 Dec;142(6):1439-52.  
5  
6  
7 19. Roselli EE, Abdel Azim A, Houghtaling PL, Jaber WA, Blackstone EH. Pulmonary  
8 hypertension is associated with worse early and late outcomes after aortic valve  
9 replacement: implications for transcatheter aortic valve replacement. *J Thorac*  
10 *Cardiovasc Surg.* 2012 Nov;144(5):1067-74  
11  
12  
13 20. Melby SJ, Moon MR, Lindman BR, Bailey MS, Hill LL, Damiano RJ, Jr. Impact of  
14 pulmonary hypertension on outcomes after aortic valve replacement for aortic valve  
15 stenosis. *J Thorac Cardiovasc Surg.* 2011 Jun;141(6):1424-30  
16  
17  
18 21. Zuern CS, Eick C, Rizas K, Stoleriu C, Woernle B, Wildhirt S, et al. Prognostic value of  
19 mild-to-moderate pulmonary hypertension in patients with severe aortic valve  
20 stenosis undergoing aortic valve replacement. *Clin Res Cardiol.* 2012 Feb;101(2):81-  
21 8.  
22  
23  
24 22. Kainuma S, Taniguchi K, Toda K, Funatsu T, Kondoh H, Nishino M, et al. Pulmonary  
25 hypertension predicts adverse cardiac events after restrictive mitral annuloplasty for  
26 severe functional mitral regurgitation. *J Thorac Cardiovasc Surg.* 2011  
27 Oct;142(4):783-92.  
28  
29  
30 23. Agarwal R, Shah SJ, Foreman AJ, Glassner C, Bartolome SD, Safdar Z, et al. Risk  
31 assessment in pulmonary hypertension associated with heart failure and preserved  
32 ejection fraction. *J Heart Lung Transplant.* 2012 May;31(5):467-77.  
33  
34  
35 24. Naidoo DP, Mitha AS, Vythilingum S, Chetty S. Pulmonary hypertension in aortic  
36 regurgitation: early surgical outcome. *Q J Med.* 1991 Jul;80(291):589-95  
37  
38  
39 25. Fawzy ME, Hassan W, Stefadouros M, Moursi M, El Shaer F, Chaudhary MA.  
40 Prevalence and fate of severe pulmonary hypertension in 559 consecutive patients  
41 with severe rheumatic mitral stenosis undergoing mitral balloon valvotomy. *J Heart*  
42 *Valve Dis.* 2004 Nov;13(6):942-7  
43  
44  
45  
46  
47  
48  
49  
50  
51  
52  
53  
54  
55  
56  
57  
58  
59  
60



# PRISMA 2009 Checklist

| Section/topic                      | #  | Checklist item                                                                                                                                                                                                                                                                                              | Reported on page # |
|------------------------------------|----|-------------------------------------------------------------------------------------------------------------------------------------------------------------------------------------------------------------------------------------------------------------------------------------------------------------|--------------------|
| <b>TITLE</b>                       |    |                                                                                                                                                                                                                                                                                                             |                    |
| Title                              | 1  | Identify the report as a systematic review, meta-analysis, or both.                                                                                                                                                                                                                                         | 1                  |
| <b>ABSTRACT</b>                    |    |                                                                                                                                                                                                                                                                                                             |                    |
| Structured summary                 | 2  | Provide a structured summary including, as applicable: background; objectives; data sources; study eligibility criteria, participants, and interventions; study appraisal and synthesis methods; results; limitations; conclusions and implications of key findings; systematic review registration number. | 2,3                |
| <b>INTRODUCTION</b>                |    |                                                                                                                                                                                                                                                                                                             |                    |
| Rationale                          | 3  | Describe the rationale for the review in the context of what is already known.                                                                                                                                                                                                                              | 6                  |
| Objectives                         | 4  | Provide an explicit statement of questions being addressed with reference to participants, interventions, comparisons, outcomes, and study design (PICOS).                                                                                                                                                  | 6,7                |
| <b>METHODS</b>                     |    |                                                                                                                                                                                                                                                                                                             |                    |
| Protocol and registration          | 5  | Indicate if a review protocol exists, if and where it can be accessed (e.g., Web address), and, if available, provide registration information including registration number.                                                                                                                               | NA                 |
| Eligibility criteria               | 6  | Specify study characteristics (e.g., PICOS, length of follow-up) and report characteristics (e.g., years considered, language, publication status) used as criteria for eligibility, giving rationale.                                                                                                      | 7                  |
| Information sources                | 7  | Describe all information sources (e.g., databases with dates of coverage, contact with study authors to identify additional studies) in the search and date last searched.                                                                                                                                  | 8                  |
| Search                             | 8  | Present full electronic search strategy for at least one database, including any limits used, such that it could be repeated.                                                                                                                                                                               | 7, 40              |
| Study selection                    | 9  | State the process for selecting studies (i.e., screening, eligibility, included in systematic review, and, if applicable, included in the meta-analysis).                                                                                                                                                   | 7                  |
| Data collection process            | 10 | Describe method of data extraction from reports (e.g., piloted forms, independently, in duplicate) and any processes for obtaining and confirming data from investigators.                                                                                                                                  | 7,8                |
| Data items                         | 11 | List and define all variables for which data were sought (e.g., PICOS, funding sources) and any assumptions and simplifications made.                                                                                                                                                                       | 7                  |
| Risk of bias in individual studies | 12 | Describe methods used for assessing risk of bias of individual studies (including specification of whether this was done at the study or outcome level), and how this information is to be used in any data synthesis.                                                                                      | 8                  |
| Summary measures                   | 13 | State the principal summary measures (e.g., risk ratio, difference in means).                                                                                                                                                                                                                               | NA                 |
| Synthesis of results               | 14 | Describe the methods of handling data and combining results of studies, if done, including measures of consistency (e.g., $I^2$ ) for each meta-analysis.                                                                                                                                                   | NA                 |

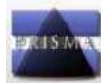

# PRISMA 2009 Checklist

| Section/topic                 | #  | Checklist item                                                                                                                                                                                           | Reported on page # |
|-------------------------------|----|----------------------------------------------------------------------------------------------------------------------------------------------------------------------------------------------------------|--------------------|
| Risk of bias across studies   | 15 | Specify any assessment of risk of bias that may affect the cumulative evidence (e.g., publication bias, selective reporting within studies).                                                             | 8,9                |
| Additional analyses           | 16 | Describe methods of additional analyses (e.g., sensitivity or subgroup analyses, meta-regression), if done, indicating which were pre-specified.                                                         | NA                 |
| <b>RESULTS</b>                |    |                                                                                                                                                                                                          |                    |
| Study selection               | 17 | Give numbers of studies screened, assessed for eligibility, and included in the review, with reasons for exclusions at each stage, ideally with a flow diagram.                                          | 9                  |
| Study characteristics         | 18 | For each study, present characteristics for which data were extracted (e.g., study size, PICOS, follow-up period) and provide the citations.                                                             | 24-38              |
| Risk of bias within studies   | 19 | Present data on risk of bias of each study and, if available, any outcome level assessment (see item 12).                                                                                                | 25,25              |
| Results of individual studies | 20 | For all outcomes considered (benefits or harms), present, for each study: (a) simple summary data for each intervention group (b) effect estimates and confidence intervals, ideally with a forest plot. | 26-38              |
| Synthesis of results          | 21 | Present results of each meta-analysis done, including confidence intervals and measures of consistency.                                                                                                  | NA                 |
| Risk of bias across studies   | 22 | Present results of any assessment of risk of bias across studies (see Item 15).                                                                                                                          | 24,25              |
| Additional analysis           | 23 | Give results of additional analyses, if done (e.g., sensitivity or subgroup analyses, meta-regression [see Item 16]).                                                                                    | NA                 |
| <b>DISCUSSION</b>             |    |                                                                                                                                                                                                          |                    |
| Summary of evidence           | 24 | Summarize the main findings including the strength of evidence for each main outcome; consider their relevance to key groups (e.g., healthcare providers, users, and policy makers).                     | 11                 |
| Limitations                   | 25 | Discuss limitations at study and outcome level (e.g., risk of bias), and at review-level (e.g., incomplete retrieval of identified research, reporting bias).                                            | 15,16              |
| Conclusions                   | 26 | Provide a general interpretation of the results in the context of other evidence, and implications for future research.                                                                                  | 16                 |
| <b>FUNDING</b>                |    |                                                                                                                                                                                                          |                    |
| Funding                       | 27 | Describe sources of funding for the systematic review and other support (e.g., supply of data); role of funders for the systematic review.                                                               | 17                 |

From: Moher D, Liberati A, Tetzlaff J, Altman DG, The PRISMA Group (2009). Preferred Reporting Items for Systematic Reviews and Meta-Analyses: The PRISMA Statement. PLoS Med 6(6): e1000097. doi:10.1371/journal.pmed1000097

For more information, visit: [www.prisma-statement.org](http://www.prisma-statement.org).
